# Supplementary material for: Dereplication, Annotation, and Characterization of 74 Potential Antimicrobial Metabolites from Penicillium Sclerotiorum Using t-SNE Molecular Networks
Source: MDPI journal article supplement (doi:10.3390/metabo11070444), 2021-07-08
Supplement: s1 [file s1]

# Dereplication, annotation and characterization of 74 potential anti-microbial metabolites from *Penicillium sclerotium* using t-SNE Molecular Networking

Teo Hebra, Salomé Poyer, Nicolas Elie, Elsa Van Elslande, David Touboul\*, Véronique Eparvier\*  
Université Paris-Saclay, CNRS, Institut de Chimie des Substances Naturelles, UPR 2301, 91198, Gif-sur-Yvette, France.

SupData

[Contents](#)

|                                                                                                                                      |    |
|--------------------------------------------------------------------------------------------------------------------------------------|----|
| Figure S1: Biological analyses of 109 ethyl acetate crude extracts from the associated microorganisms of French Guiana Termites..... | 5  |
| Figure S2: Molecular network from 109 crude extracts. ....                                                                           | 6  |
| Figure S3: MS/MS information of compound 1.....                                                                                      | 7  |
| Figure S4: MS/MS information of compound 2.....                                                                                      | 8  |
| Figure S5: MS/MS information of compound 3.....                                                                                      | 9  |
| Figure S6: MS/MS information of compound 4.....                                                                                      | 10 |
| Figure S7: MS/MS information of compound 5.....                                                                                      | 11 |
| Figure S8: Minimal inhibitory concentration of fractions 2 to 11 against three human pathogens .....                                 | 12 |
| Figure S9: MS/MS information of compound 6.....                                                                                      | 13 |
| Figure S10: MS/MS information of compound 7.....                                                                                     | 14 |
| Figure S11: MS/MS information of compound 8.....                                                                                     | 15 |
| Figure S12: MS/MS information of compound 9.....                                                                                     | 16 |
| Figure S13: MS/MS information of compound 10.....                                                                                    | 17 |
| Figure S14: MS/MS information of compound 11.....                                                                                    | 18 |
| Figure S15: MS/MS information of compound 12.....                                                                                    | 19 |
| Figure S16: MS/MS information of compound 13.....                                                                                    | 20 |
| Figure S17: MS/MS information of compound 14.....                                                                                    | 21 |
| Figure S18: MS/MS information of compound 15.....                                                                                    | 22 |
| Figure S19: MS/MS information of compound 16.....                                                                                    | 23 |
| Figure S20: MS/MS information of compound 17.....                                                                                    | 24 |
| Figure S21: MS/MS information of compound 18.....                                                                                    | 25 |
| Figure S22: MS/MS information of compound 19.....                                                                                    | 26 |
| Figure S23: MS/MS information of compound 20.....                                                                                    | 27 |
| Figure S24: MS/MS information of compound 21.....                                                                                    | 28 |
| Figure S25: MS/MS information of compound 22.....                                                                                    | 29 |
| Figure S26: MS/MS information of compound 23.....                                                                                    | 30 |
| Figure S27: MS/MS information of compound 24.....                                                                                    | 31 |
| Figure S28: MS/MS information of compound 25.....                                                                                    | 31 |
| Figure S29: MS/MS information of compound 26.....                                                                                    | 32 |
| Figure S30: MS/MS information of compound 27.....                                                                                    | 33 |

|                                                           |    |
|-----------------------------------------------------------|----|
| Figure S31: MS/MS information of compound <b>28</b> ..... | 34 |
| Figure S32: MS/MS information of compound <b>29</b> ..... | 35 |
| Figure S33: MS/MS information of compound <b>30</b> ..... | 36 |
| Figure S34: MS/MS information of compound <b>31</b> ..... | 37 |
| Figure S35: MS/MS information of compound <b>32</b> ..... | 38 |
| Figure S36: MS/MS information of compound <b>33</b> ..... | 39 |
| Figure S37: MS/MS information of compound <b>34</b> ..... | 40 |
| Figure S38: MS/MS information of compound <b>35</b> ..... | 41 |
| Figure S39: MS/MS information of compound <b>36</b> ..... | 42 |
| Figure S40: MS/MS information of compound <b>37</b> ..... | 43 |
| Figure S41: MS/MS information of compound <b>38</b> ..... | 44 |
| Figure S42: MS/MS information of compound <b>39</b> ..... | 45 |
| Figure S43: MS/MS information of compound <b>40</b> ..... | 46 |
| Figure S44: MS/MS information of compound <b>41</b> ..... | 47 |
| Figure S45: MS/MS information of compound <b>42</b> ..... | 48 |
| Figure S46: MS/MS information of compound <b>43</b> ..... | 49 |
| Figure S47: MS/MS information of compound <b>44</b> ..... | 50 |
| Figure S48: MS/MS information of compound <b>45</b> ..... | 51 |
| Figure S49: MS/MS information of compound <b>46</b> ..... | 52 |
| Figure S50: MS/MS information of compound <b>47</b> ..... | 53 |
| Figure S51: MS/MS information of compound <b>48</b> ..... | 54 |
| Figure S52: MS/MS information of compound <b>49</b> ..... | 55 |
| Figure S53: MS/MS information of compound <b>50</b> ..... | 56 |
| Figure S54: MS/MS information of compound <b>51</b> ..... | 57 |
| Figure S55: MS/MS information of compound <b>52</b> ..... | 58 |
| Figure S56: MS/MS information of compound <b>53</b> ..... | 59 |
| Figure S57: MS/MS information of compound <b>54</b> ..... | 60 |
| Figure S58: MS/MS information of compound <b>55</b> ..... | 61 |
| Figure S59: MS/MS information of compound <b>56</b> ..... | 62 |
| Figure S60: MS/MS information of compound <b>57</b> ..... | 63 |
| Figure S61: MS/MS information of compound <b>58</b> ..... | 64 |
| Figure S62: MS/MS information of compound <b>59</b> ..... | 65 |
| Figure S63: MS/MS information of compound <b>60</b> ..... | 66 |
| Figure S64: MS/MS information of compound <b>61</b> ..... | 67 |
| Figure S65: MS/MS information of compound <b>62</b> ..... | 68 |
| Figure S66: MS/MS information of compound <b>63</b> ..... | 69 |
| Figure S67: MS/MS information of compound <b>64</b> ..... | 70 |
| Figure S68: MS/MS information of compound <b>65</b> ..... | 71 |
| Figure S69: MS/MS information of compound <b>66</b> ..... | 72 |
| Figure S70: MS/MS information of compound <b>67</b> ..... | 73 |

|                                                                                                          |     |
|----------------------------------------------------------------------------------------------------------|-----|
| Figure S71: MS/MS information of compound <b>68</b> .....                                                | 74  |
| Figure S72: MS/MS information of compound <b>69</b> .....                                                | 75  |
| Figure S73: MS/MS information of compound <b>70</b> .....                                                | 76  |
| Figure S74: MS/MS information of compound <b>71</b> .....                                                | 77  |
| Figure S75: MS/MS information of compound <b>72</b> .....                                                | 78  |
| Figure S76: MS/MS information of compound <b>73</b> .....                                                | 79  |
| Figure S77: MS/MS information of compound <b>74</b> .....                                                | 80  |
| Figure S78: MS/MS information of compound <b>75</b> .....                                                | 81  |
| Figure S79: MS/MS information of compound <b>76</b> .....                                                | 82  |
| Figure S80: MS/MS information of compound <b>77</b> .....                                                | 83  |
| Figure S81: MS/MS information of compound <b>78</b> .....                                                | 84  |
| Figure S82: MS/MS information of compound <b>79</b> .....                                                | 85  |
| TableS1: <sup>1</sup> H NMR spectroscopic data for compounds <b>1, 2, 5, 23, 75, 63, 80 and 74</b> ..... | 86  |
| Table S2: <sup>13</sup> C NMR spectroscopic data for compounds <b>1, 2, 5, 23, 63, 74, 75, 80</b> .....  | 87  |
| Figure S83: <sup>1</sup> H NMR spectrum (CDCl <sub>3</sub> ) of compound <b>1</b> .....                  | 88  |
| Figure S84: <sup>13</sup> C NMR spectrum (CDCl <sub>3</sub> ) of compound <b>1</b> .....                 | 89  |
| Figure S85: HRMS of compound <b>1</b> .....                                                              | 90  |
| Figure S86: <sup>1</sup> H NMR spectrum (CDCl <sub>3</sub> ) of compound <b>2</b> .....                  | 91  |
| Figure S87: <sup>13</sup> C NMR spectrum (CDCl <sub>3</sub> ) of compound <b>2</b> .....                 | 92  |
| Figure S88: HRMS of compound <b>2</b> .....                                                              | 93  |
| Figure S89: <sup>1</sup> H NMR spectrum (CDCl <sub>3</sub> ) of compound <b>5</b> .....                  | 94  |
| Figure S90: <sup>13</sup> C NMR spectrum (CDCl <sub>3</sub> ) of compound <b>5</b> .....                 | 95  |
| Figure S91: HRMS of compound <b>5</b> .....                                                              | 96  |
| Figure S92: <sup>1</sup> H NMR (MeOD) spectrum of compound compound <b>23</b> .....                      | 97  |
| Figure S93: HRMS of compound <b>23</b> .....                                                             | 98  |
| Figure S94: <sup>1</sup> H NMR spectrum (CDCl <sub>3</sub> ) of compound <b>75</b> .....                 | 99  |
| Figure S95: <sup>13</sup> C NMR (CDCl <sub>3</sub> ) spectrum of compound <b>75</b> .....                | 100 |
| Figure S96: HRMS of compound <b>75</b> .....                                                             | 101 |
| Figure S97: <sup>1</sup> H NMR spectrum (CDCl <sub>3</sub> ) of compound <b>63</b> .....                 | 102 |
| Figure S98: <sup>13</sup> C NMR spectrum (CDCl <sub>3</sub> ) of compound <b>63</b> .....                | 103 |
| Figure S99: COSY NMR spectrum (CDCl <sub>3</sub> ) of compound <b>63</b> .....                           | 104 |
| Figure S100: HSQC NMR spectrum (CDCl <sub>3</sub> ) of compound <b>63</b> .....                          | 105 |
| Figure S101: HMBC NMR spectrum (CDCl <sub>3</sub> ) of compound <b>63</b> .....                          | 106 |
| Figure S102: HRMS of compound <b>63</b> .....                                                            | 107 |
| Figure S103: <sup>1</sup> H NMR spectrum (CDCl <sub>3</sub> ) of compound <b>74</b> .....                | 108 |
| Figure S104: <sup>13</sup> C NMR spectrum (CDCl <sub>3</sub> ) of compound <b>74</b> .....               | 109 |
| Figure S106: HSQC NMR spectrum (CDCl <sub>3</sub> ) of compound <b>74</b> .....                          | 111 |
| Figure S107: HMBC NMR spectrum (CDCl <sub>3</sub> ) of compound <b>74</b> .....                          | 112 |
| Figure S108: HRMS of compound <b>74</b> .....                                                            | 113 |
| Figure S109: Compound <b>80</b> position within t-SNE molecular network.....                             | 114 |

|                                                                                                                                                                                          |     |
|------------------------------------------------------------------------------------------------------------------------------------------------------------------------------------------|-----|
| Figure S110: MS/MS information of compound <b>80</b> .....                                                                                                                               | 115 |
| Figure S111: <sup>1</sup> H NMR spectrum (DMF- <i>d</i> 6) of compound <b>80</b> .....                                                                                                   | 116 |
| Figure S112: <sup>13</sup> C NMR spectrum (DMF- <i>d</i> 6) of compound <b>80</b> .....                                                                                                  | 117 |
| Figure S113: COSY NMR spectrum (DMF- <i>d</i> 6) of compound <b>80</b> .....                                                                                                             | 118 |
| Figure S114: HSQC NMR spectrum (DMF- <i>d</i> 6) of compound <b>80</b> .....                                                                                                             | 119 |
| Figure S115: HMBC NMR spectrum (DMF- <i>d</i> 6) of compound <b>80</b> .....                                                                                                             | 120 |
| Figure S116: HRMS of compound <b>80</b> .....                                                                                                                                            | 121 |
| FigS117: Structural elucidation of isolated azaphilones .....                                                                                                                            | 121 |
| Figure S118: UV spectra in acetonitrile of isolated azaphilones <b>1, 2, 5, 23, 63, 74, 75</b> and <b>80</b> .....                                                                       | 122 |
| Figure S119: UV spectra in methanol of isolated azaphilones <b>1, 2, 5, 23, 63, 74, 75</b> and <b>80</b> .....                                                                           | 122 |
| Figure S120: CD spectra of isolated azaphilones <b>2, 5, 23, 63, 74, 75</b> and <b>80</b> .....                                                                                          | 123 |
| Figure S121: Absolute configuration of compound <b>1</b> and <b>5</b> .....                                                                                                              | 123 |
| Table S3: Crystal data and structure refinement .....                                                                                                                                    | 124 |
| Table S4: Fractional Atomic Coordinates (×10 <sup>4</sup> ) and Equivalent Isotropic Displacement<br>Parameters (Å <sup>2</sup> ×10 <sup>3</sup> ) for compound <b>1</b> .....           | 125 |
| Table S5: Anisotropic Displacement Parameters (×10 <sup>4</sup> ) for compound <b>1</b> .....                                                                                            | 126 |
| Table S6: Bond Lengths in Å for compound <b>1</b> .....                                                                                                                                  | 127 |
| Table S7: Bond Angles in ° for compound <b>1</b> .....                                                                                                                                   | 128 |
| Table S8: Torsion Angles in ° for compound <b>1</b> .....                                                                                                                                | 129 |
| Table S9: Hydrogen Bonds for compound <b>1</b> .....                                                                                                                                     | 130 |
| Table S10: Hydrogen Fractional Atomic Coordinates (×10 <sup>4</sup> ) and Equivalent Isotropic<br>Displacement Parameters (Å <sup>2</sup> ×10 <sup>3</sup> ) for compound <b>1</b> ..... | 131 |
| Table S11: Fractional Atomic Coordinates (×10 <sup>4</sup> ) and Equivalent Isotropic Displacement<br>Parameters (Å <sup>2</sup> ×10 <sup>3</sup> ) for compound <b>5</b> .....          | 132 |
| Table S12: Anisotropic Displacement Parameters (×10 <sup>4</sup> ) for compound <b>5</b> .....                                                                                           | 133 |
| Table S13: Bond Lengths in Å for compound <b>5</b> .....                                                                                                                                 | 134 |
| Table S14: Bond Angles in ° for compound <b>5</b> .....                                                                                                                                  | 134 |
| Table S15: Torsion Angles in ° for compound <b>5</b> .....                                                                                                                               | 135 |
| Table S16: Hydrogen Bonds for compound <b>5</b> .....                                                                                                                                    | 135 |
| Table S17 Hydrogen fractional atomic coordinates (×10 <sup>4</sup> ) and equivalent isotropic displacement<br>parameters (Å <sup>2</sup> ×10 <sup>3</sup> ) for compound <b>5</b> .....  | 136 |
| Figure S122: Evolution of retention time of acylated azaphilone in function of the length of<br>acylation.....                                                                           | 137 |



Figure S1: Biological analyses of 109 ethyl acetate crude extracts from the associated microorganisms of French Guiana Termites. (a) Minimum inhibitory concentration (MIC) of crude extracts against 3 human pathogens, Methicillin-Resistant *Staphylococcus aureus* (bacteria), *Candida albicans* (yeast) and *Tricophyton rubrum* (fungus). (b) Percent of survival of MRC5 cell line (human fetal cell lung) from crude extracts. Red dots are value from *P. sclerotiorum* SNB-CN111 crude extract.

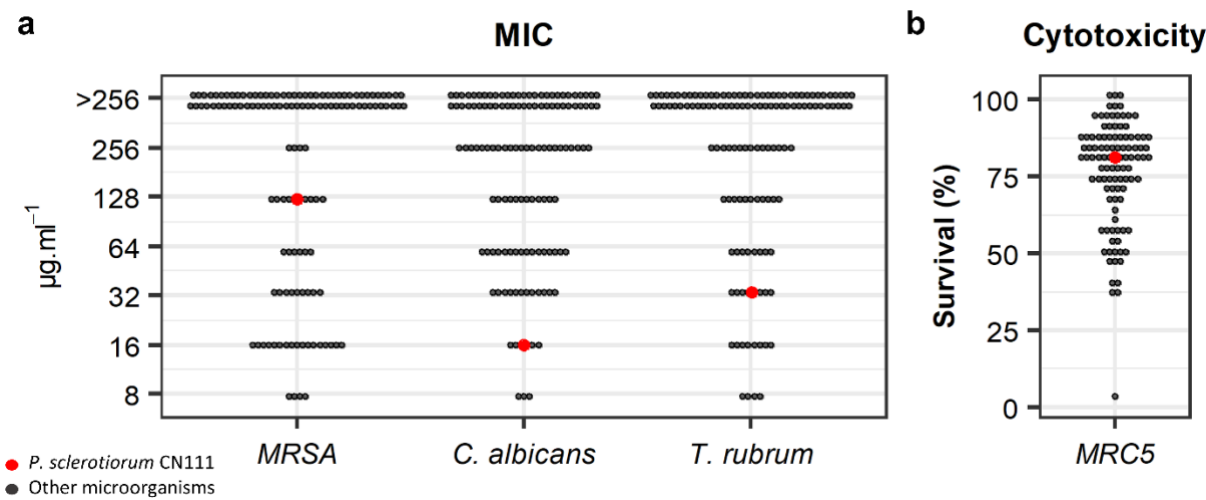

Figure S2: Molecular network from 109 crude extracts. Highlights of *P. sclerotiorum* unique molecular features (red), shared with other extracts (blue) or not present (gray)

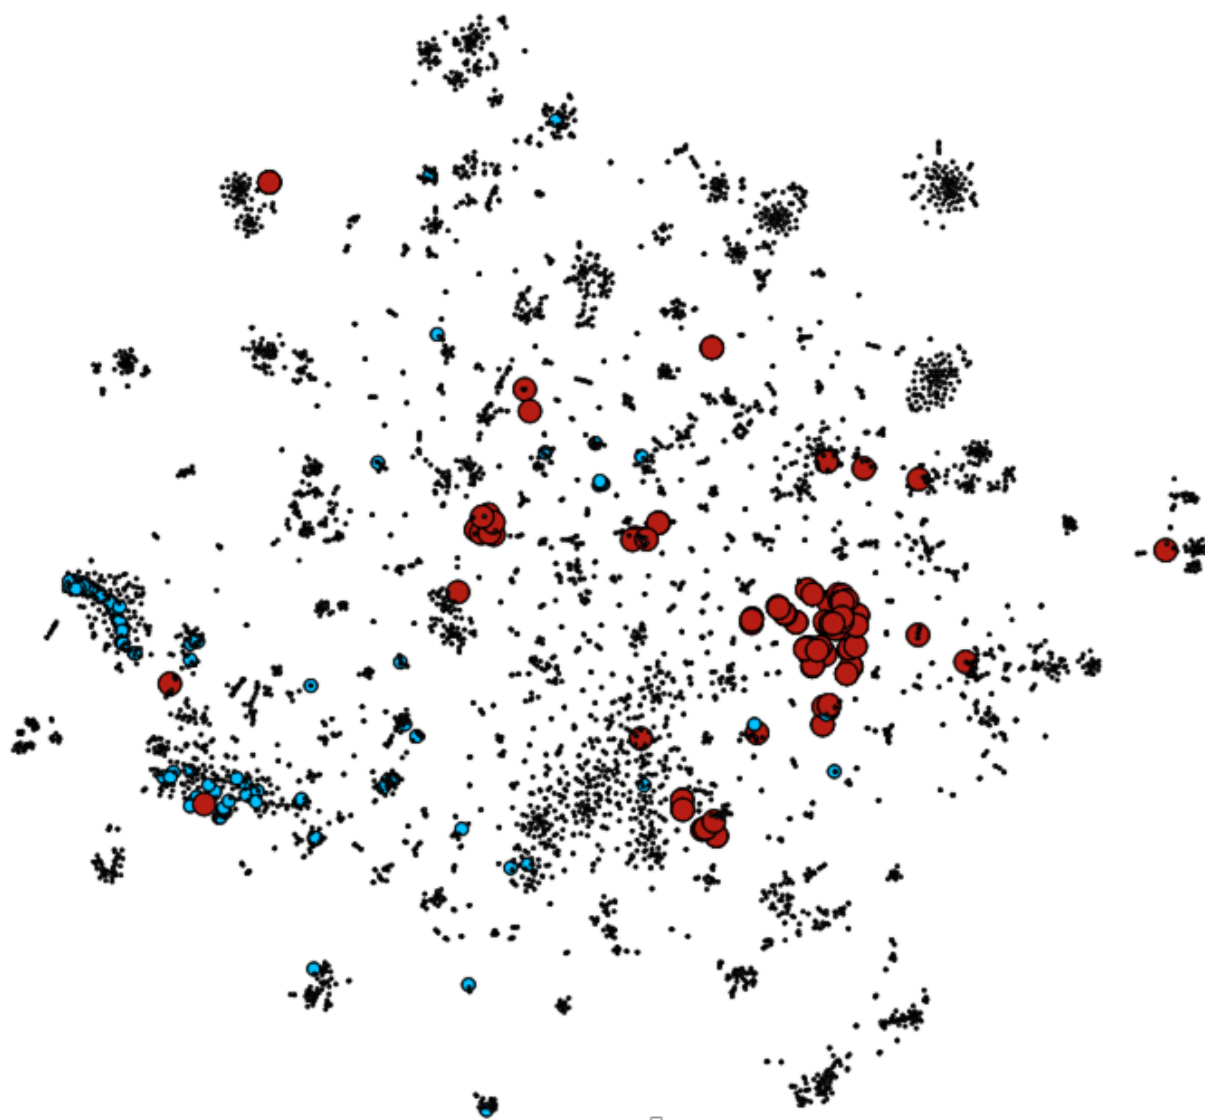

Figure S3: MS/MS information of compound **1** ( $m/z$  391.1309,  $-0.6$  ppm, cosine score= 0.82, level 0) from molecular network.(a) MS/MS spectrum of compound **1**, (b) the mirror plot of MS/MS spectra from compound **1** against its standard spectrum from MS-Dial library, and (c) the fragment list and their contribution to cosine score.

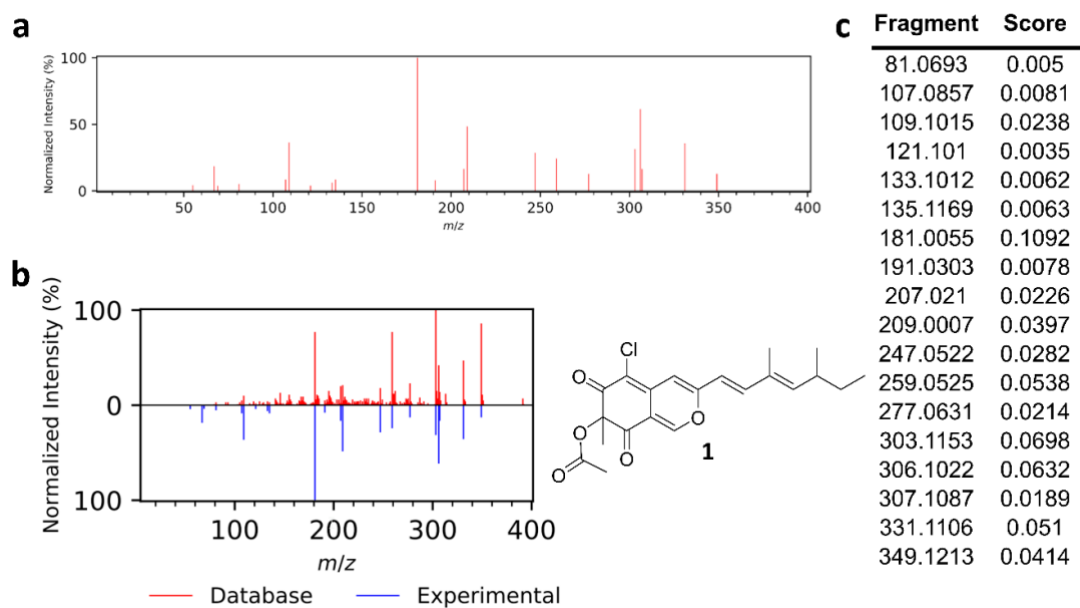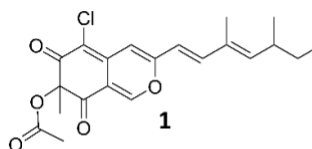

Figure S4: MS/MS information of compound **2** ( $m/z$  390.1472,  $-1.4$  ppm, cosine score= 0.97, level 0) from molecular network. (a) MS/MS spectrum of compound **2**, (b) the mirror plot of MS/MS spectra from compound **2** against its standard spectrum from MONA library, and (c) the fragment list and their contribution to cosine score.

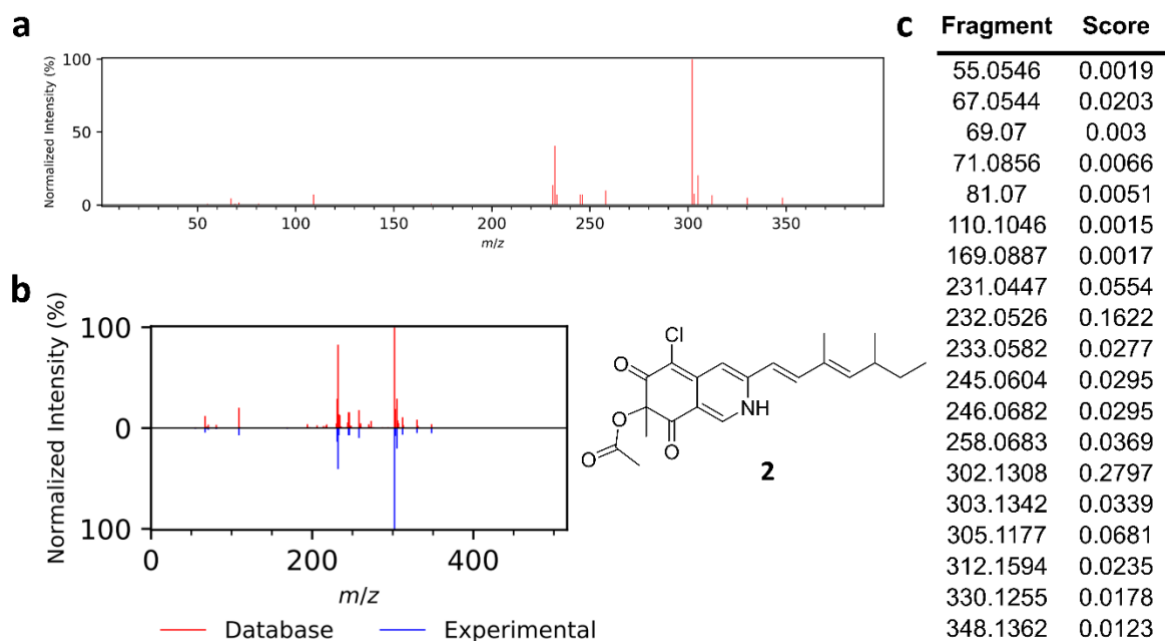

Figure S5: MS/MS information of compound **3** ( $m/z$  383.1859,  $-1.6$  ppm, cosine score= 0.86, level 2) from molecular network. (a) MS/MS spectrum of compound **3**, (b) the mirror plot of MS/MS spectra from compound **3** against its standard spectrum from MS-Dial library, and (c) the fragment list and their contribution to cosine score.

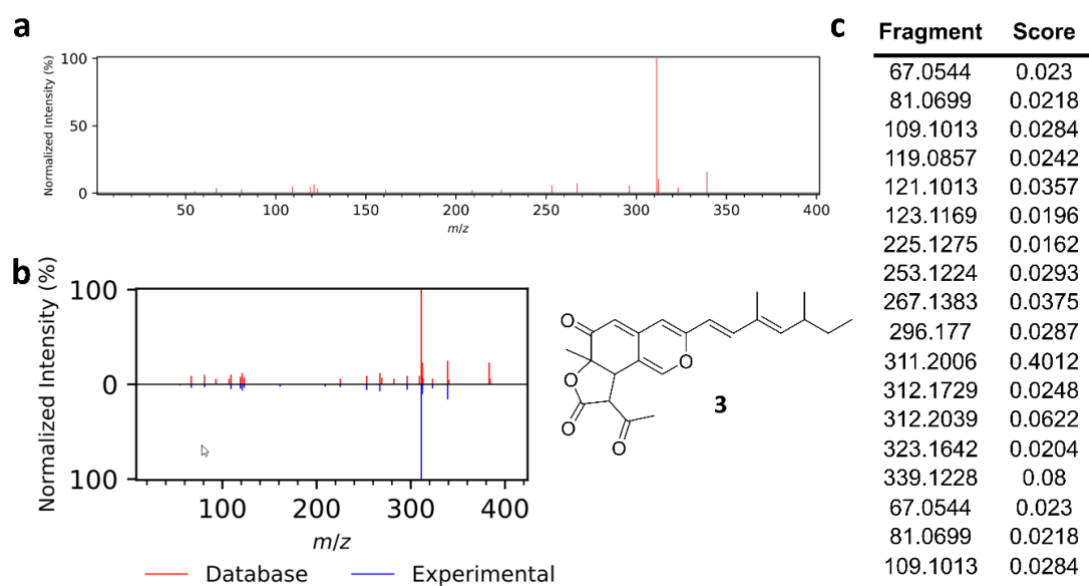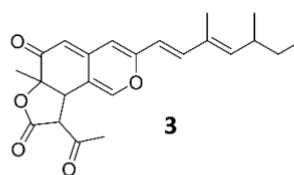

Figure S6: MS/MS information of compound **4** ( $m/z$  417.1456, 1.8 ppm, cosine score= 0.74, level 2) from molecular network. (a) MS/MS spectrum of compound **4**, (b) the mirror plot of MS/MS spectra from compound **4** against its standard spectrum from MS-Dial library, and (c) the fragment list and their contribution to cosine score.

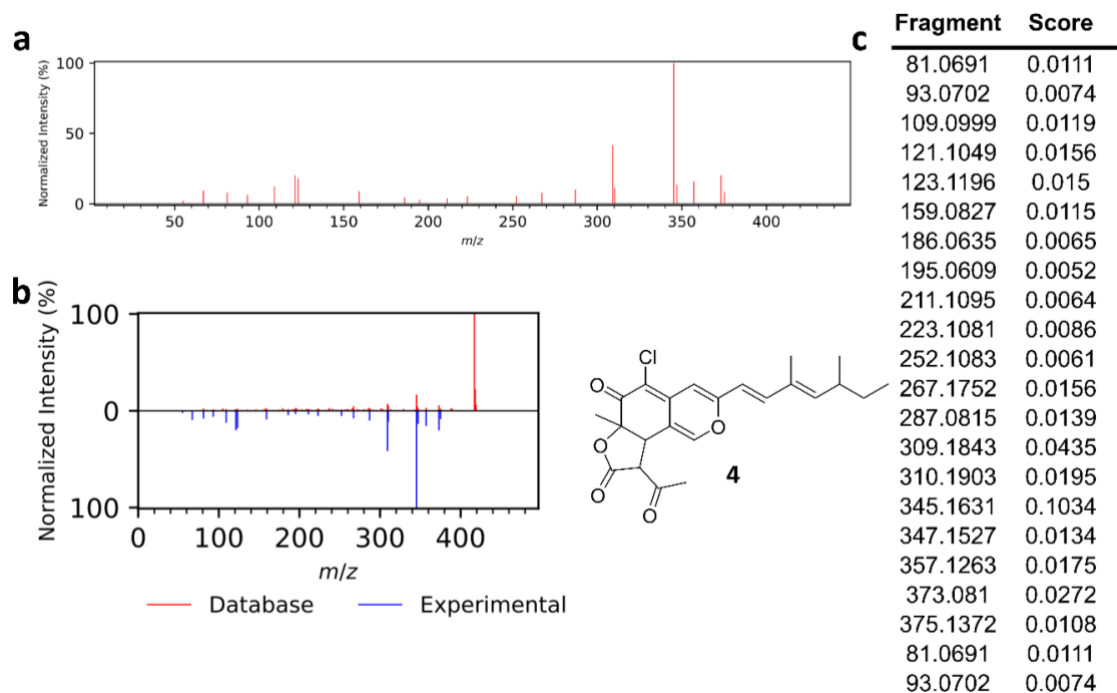

Figure S7: MS/MS information of compound **5** ( $m/z$  434.1731,  $-0.5$  ppm, cosine score= 0.83, level 0) from molecular network. (a) MS/MS spectrum of compound **5**, (b) the mirror plot of MS/MS spectra from compound **5** against its standard spectrum from MS-Dial library, and (c) the fragment list and their contribution to cosine score.

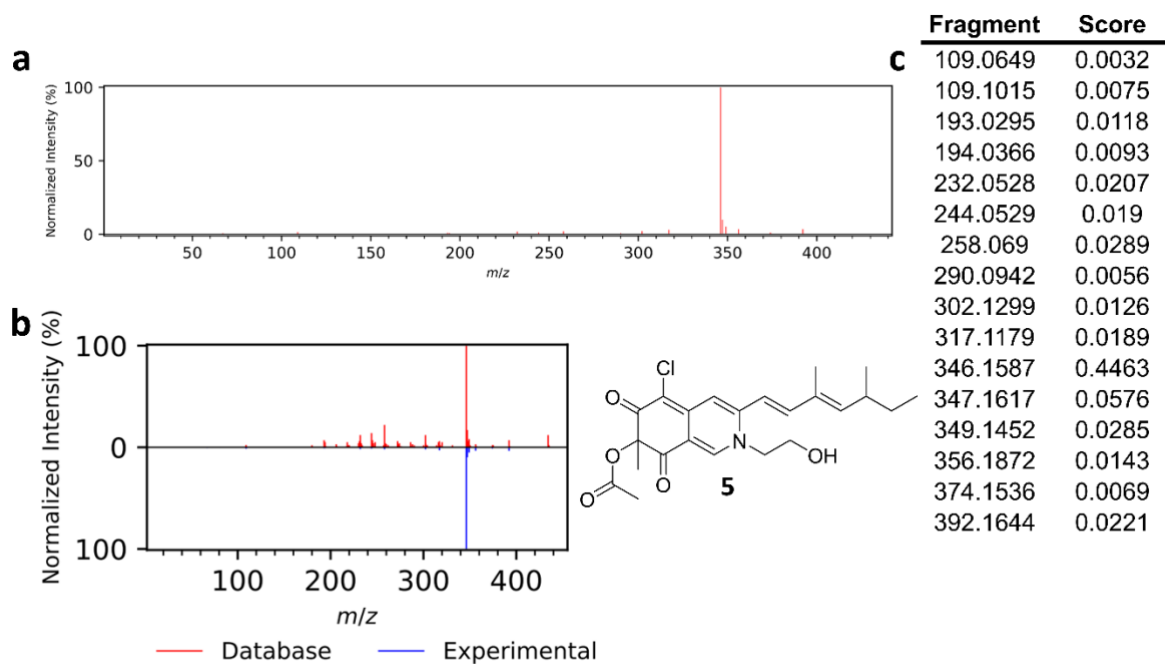

Figure S8: Minimal inhibitory concentration of fractions 2 to 11 against three human pathogens (a) MRSA, (b) *C. albicans*, and (c) *T. rubrum*.

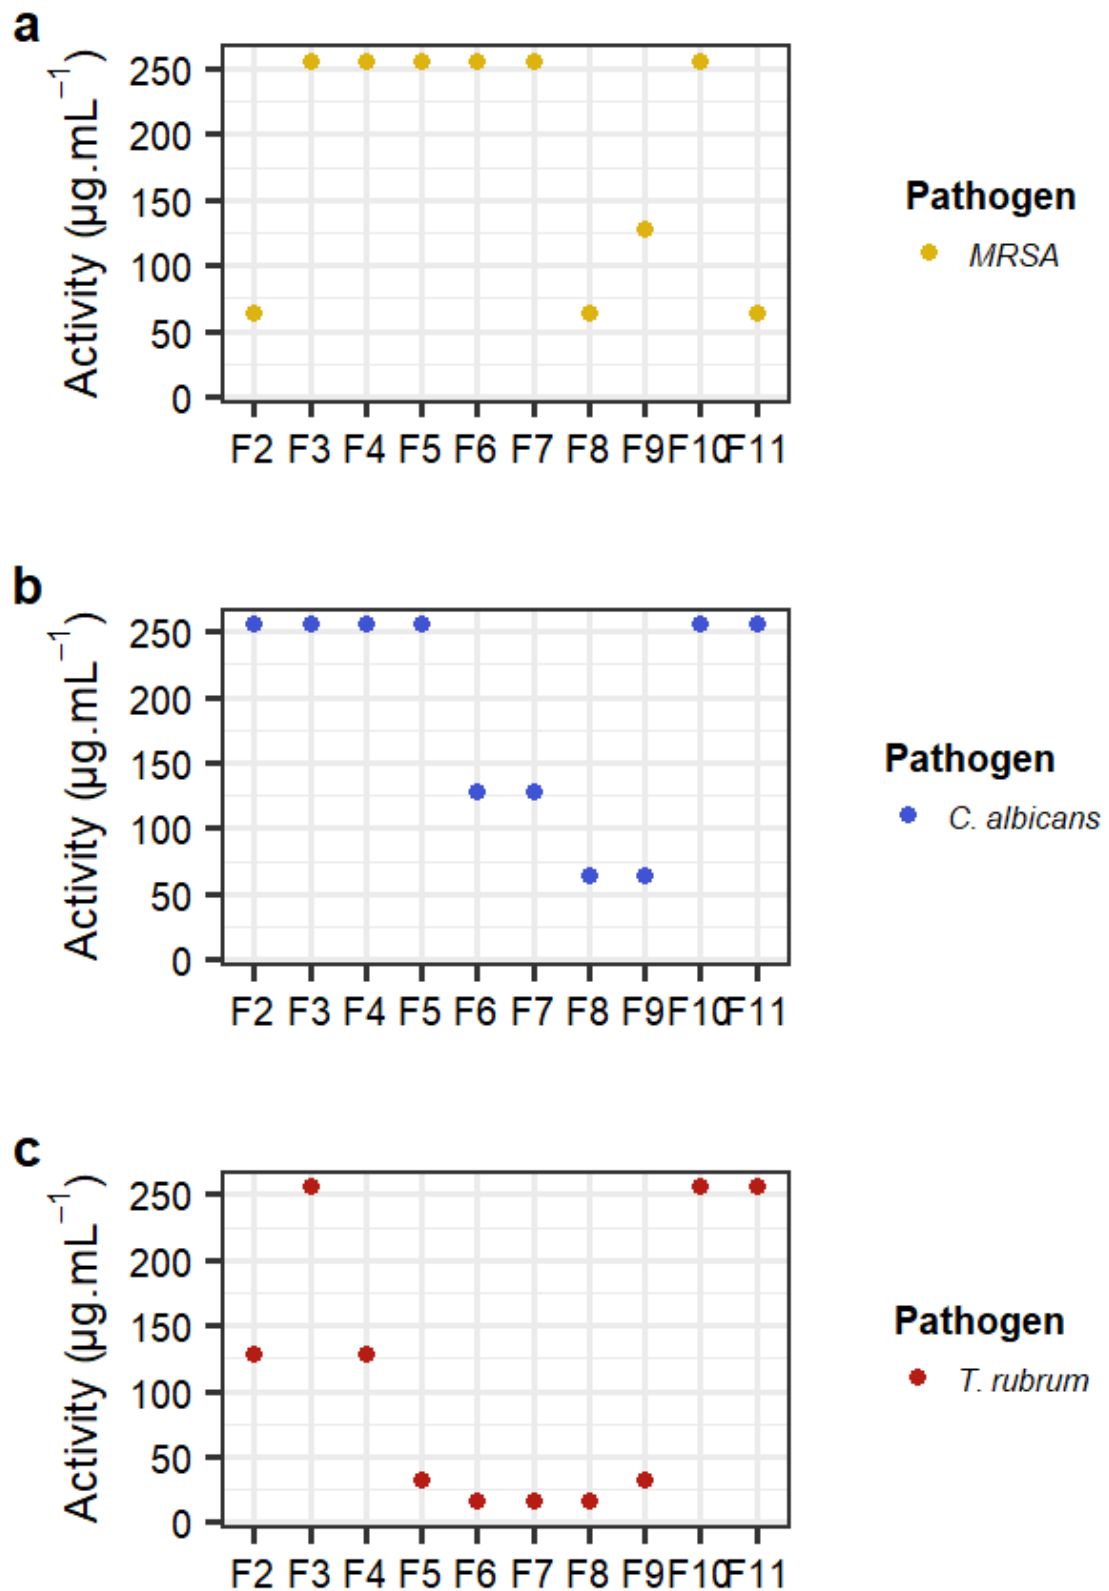



Figure S9: MS/MS information of compound **6** ( $m/z$  476.1846,  $-2.4$  ppm, cosine score= 0.92, level 2) from molecular network. (a) MS/MS spectrum of compound **6**, (b) the mirror plot of MS/MS spectra from compound **6** against its standard spectrum from MONA library, and (c) the fragment list and their contribution to cosine score.

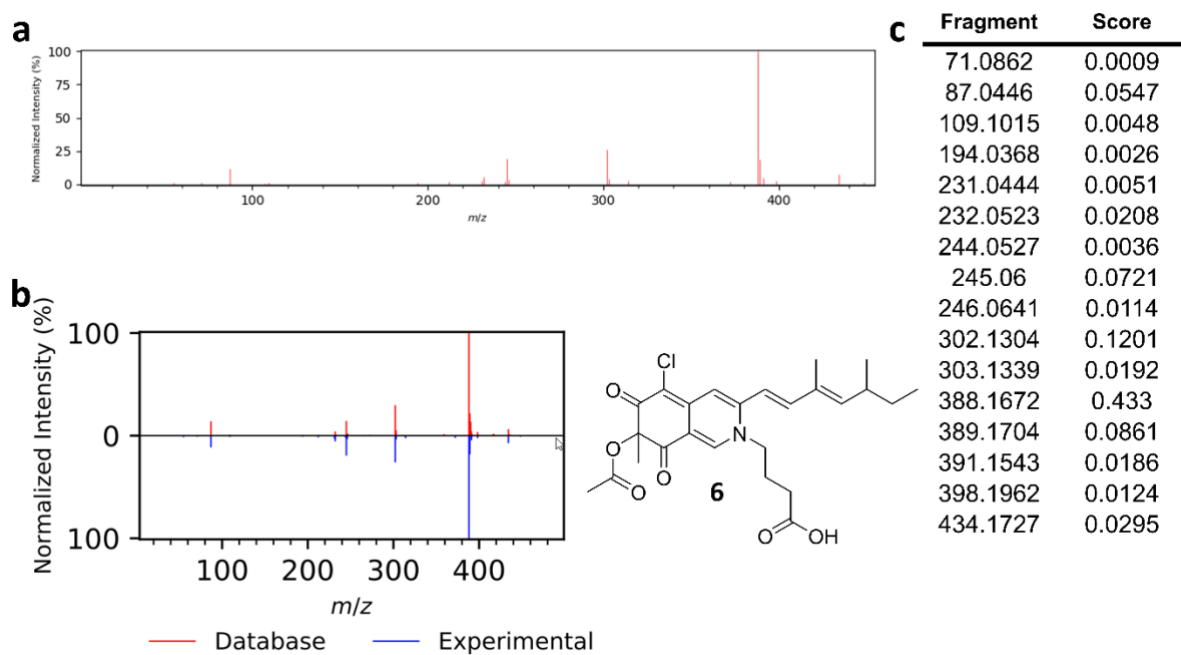

Figure S10: MS/MS information of compound **7** ( $m/z$  385.1426,  $-3.5$  ppm, cosine score = 0.76, level 2) from molecular network. (a) MS/MS spectrum of compound **7**, (b) the mirror plot of MS/MS spectra from compound **7** against its standard spectrum from GNPS library, and (c) the fragment list and their contribution to cosine score.

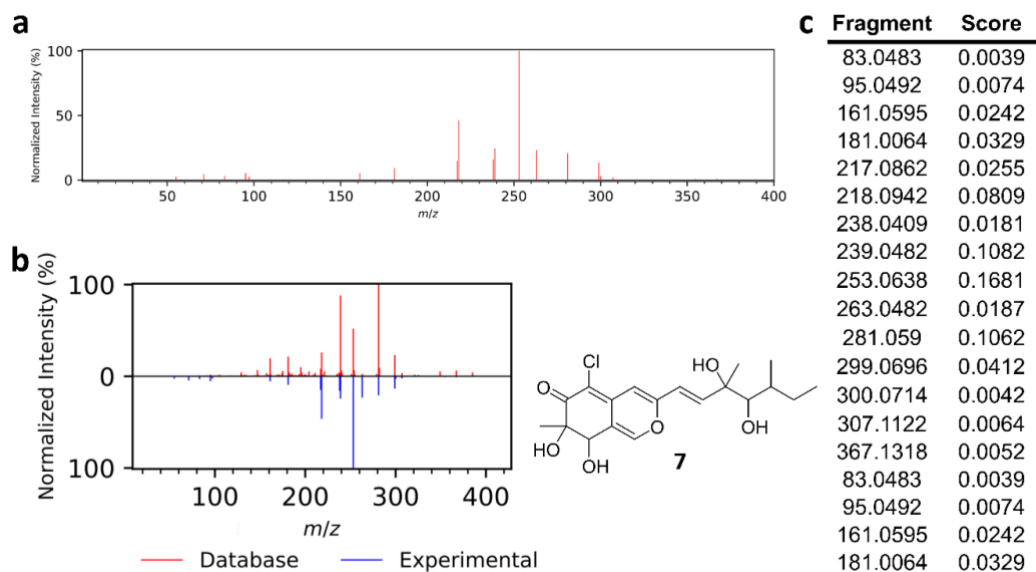

Figure S11: MS/MS information of compound **8** ( $m/z$  443.2438,  $-2.3$  ppm, cosine score= 0.96, level 2) from molecular network. (a) MS/MS spectrum of compound **8**, (b) the mirror plot of MS/MS spectra from compound **8** against its standard spectrum from MONA library, and (c) the fragment list and their contribution to cosine score.

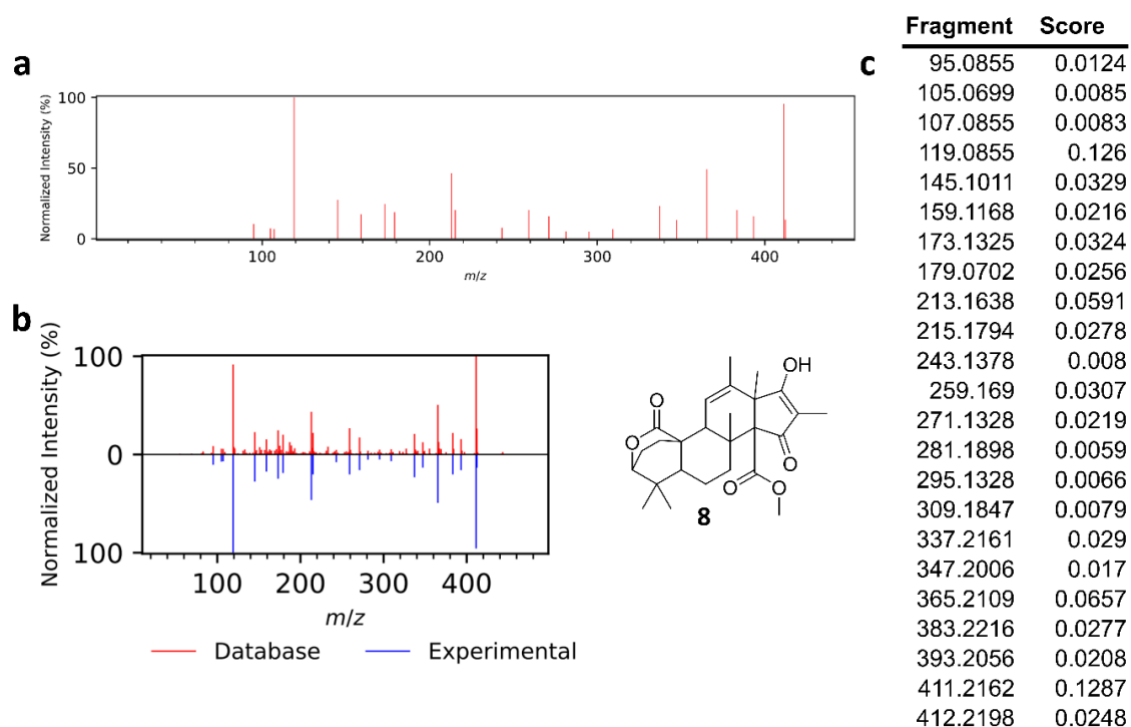

Figure S12: MS/MS information of compound **9** ( $m/z$  245.1292,  $-3.0$  ppm, cosine score= 0.97, level 2) from molecular network. (a) MS/MS spectrum of compound **9**, (b) the mirror plot of MS/MS spectra from compound **9** against its standard spectra from compound GNPS library, and (c) the fragment list and their contribution to cosine score.

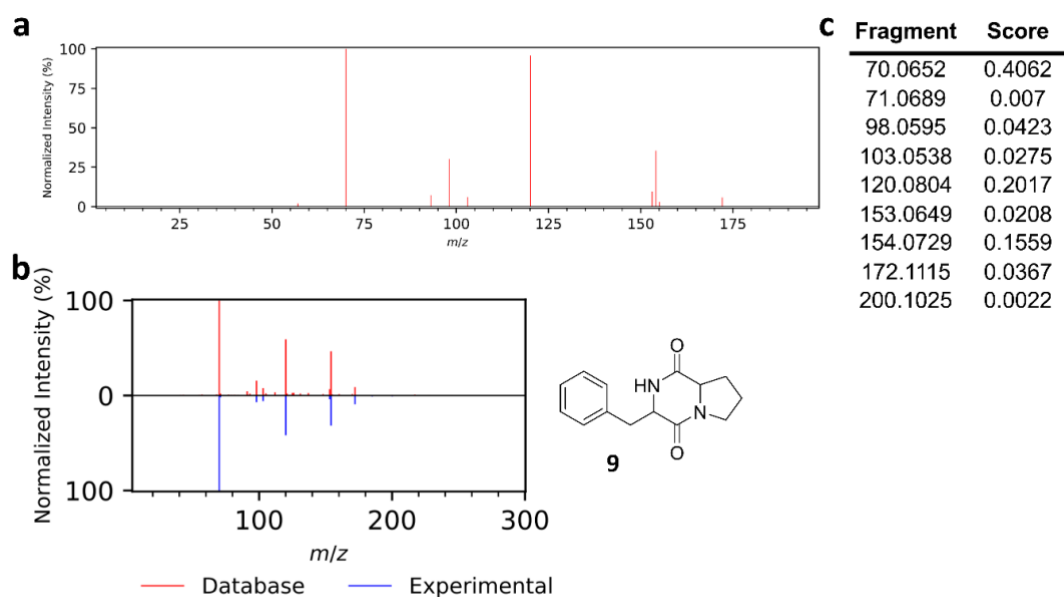

Figure S13: MS/MS information of compound **10** ( $m/z$  279.2321,  $-0.9$  ppm, cosine score= 0.88, level 2) from molecular network. (a) MS/MS spectrum of compound **10**, (b) the mirror plot of MS/MS spectra from compound **10** against its standard spectra from compound NIST14 library, and (c) the fragment list and their contribution to cosine score.

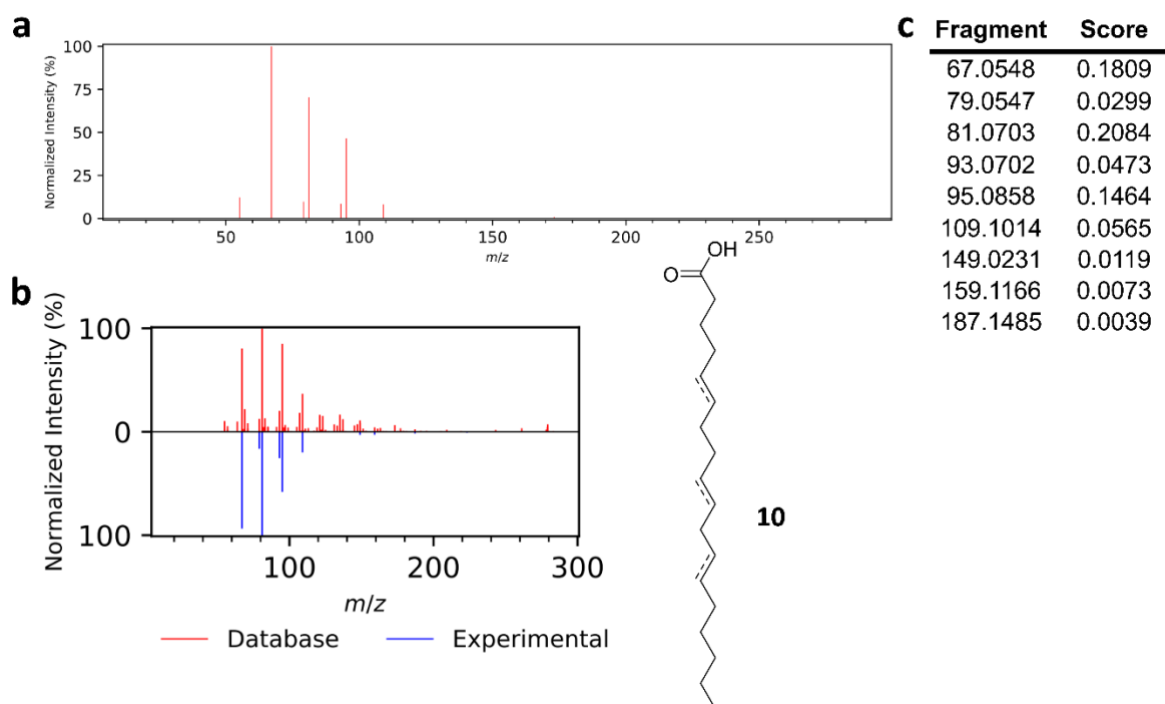

Figure S14: MS/MS information of compound **11** ( $m/z$  281.2484,  $-3.2$  ppm, cosine score= 0.75, level 2) from molecular network. (a) MS/MS spectrum of compound **11**, (b) the mirror plot of MS/MS spectra from compound **11** against its standard spectra from compound MONA library, and (c) the fragment list and their contribution to cosine score.

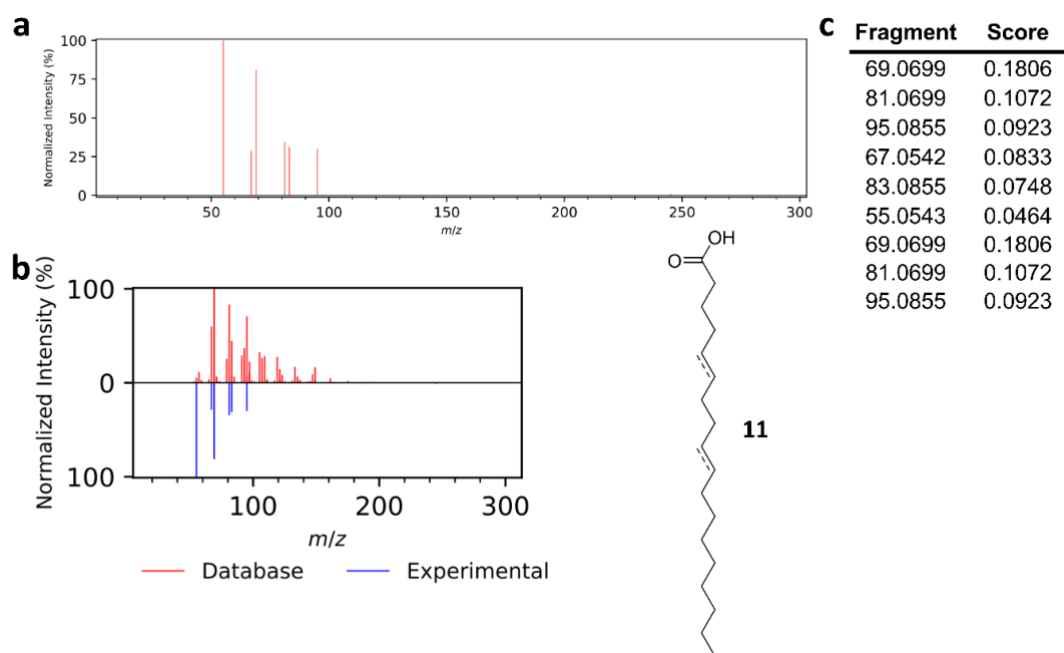

Figure S15: MS/MS information of compound **12** ( $m/z$  391.2827, 4.1 ppm, cosine score= 0.97, level 2) from molecular network.(a) MS/MS spectrum of compound **12**, (b) the mirror plot of MS/MS spectra from compound **12** against its standard spectrum from GNPS library, and (c) the fragment list and their contribution to cosine score.

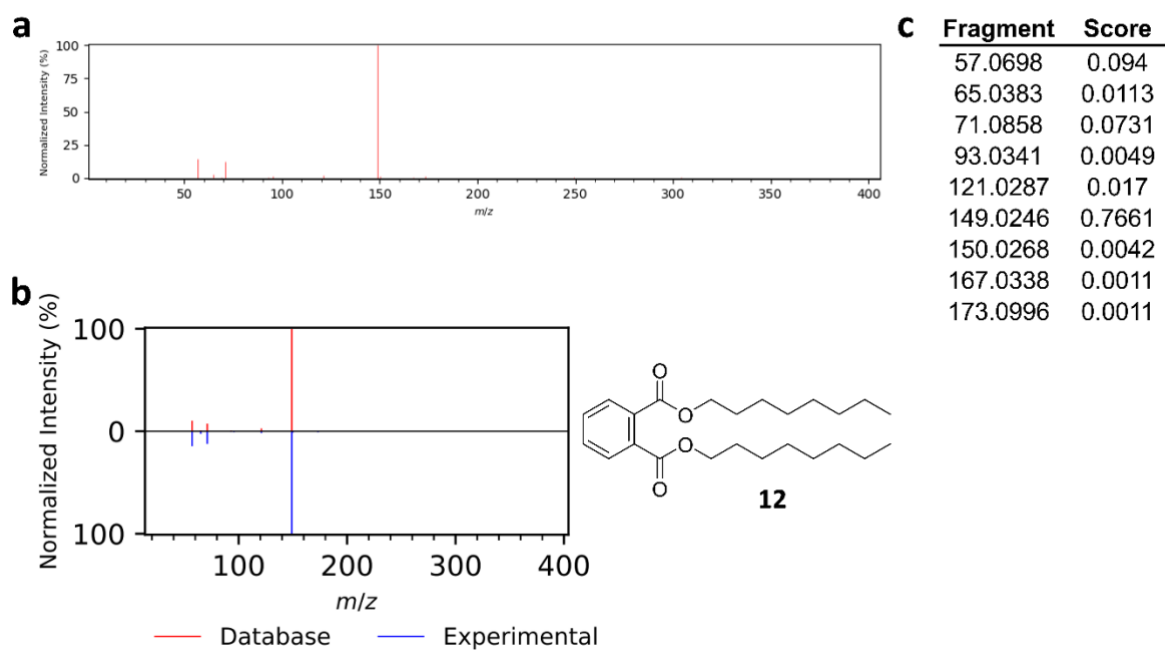

Figure S16: MS/MS information of compound **13** ( $m/z$  371.1016,  $-1.0$  ppm, cosine score= 0.95, level 2) from molecular network. (a) MS/MS spectrum of compound **13**, (b) the mirror plot of MS/MS spectra from compound **13** against its standard spectra from compound NIST14 library, and (c) the fragment list and their contribution to cosine score.

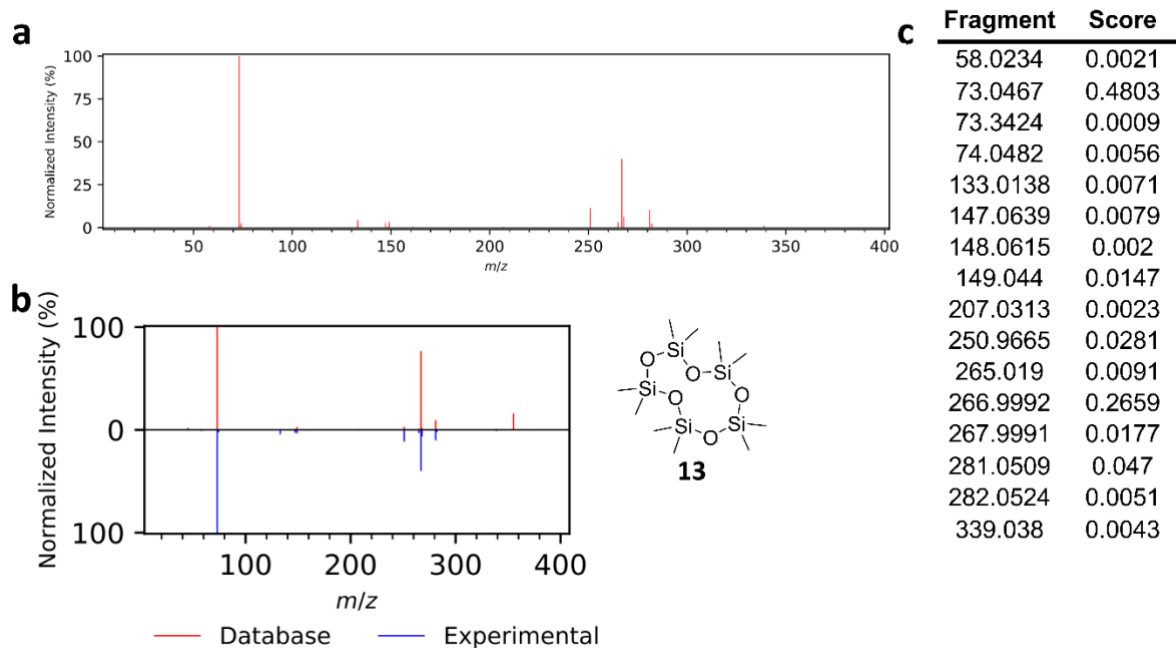



Figure S17: MS/MS information of compound **14** ( $m/z$  351.1807,  $-1.4$  ppm level 2) from molecular network and isotopic pattern of **14**. (a) MS/MS spectrum of compound **14**, (b) the mirror plot of MS/MS spectra from compound **14** against itself with the main contributors to cosine score (bold), and (c) the fragment list and their contribution to cosine score.

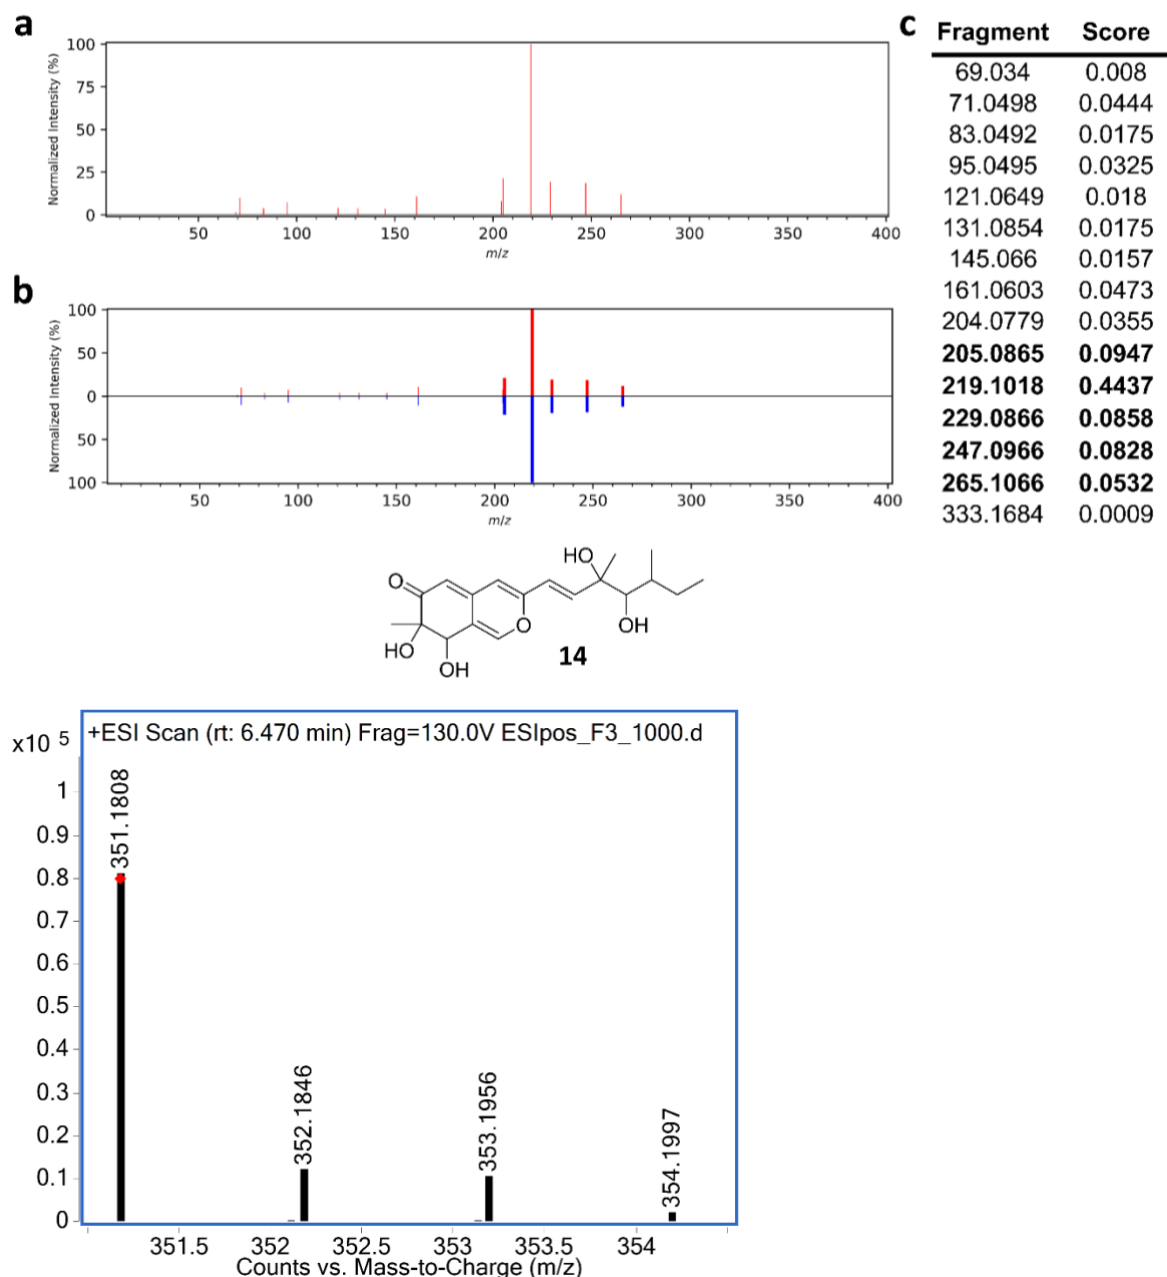

Annotation explanation: Its  $m/z$  difference with compound **7** is 33.9608, and it isotopic pattern lack of typical  $^{37}\text{Cl}$  isotopic peak.

Figure S18: MS/MS information of compound **15** ( $m/z$  417.1914,  $-1.5$  ppm, level 2) from molecular network. (a) MS/MS spectrum of compound **15**, (b) the mirror plot of MS/MS spectra from compound **15** against itself with the main contributors to cosine score (bold), and (c) the fragment list and their contribution to cosine score.

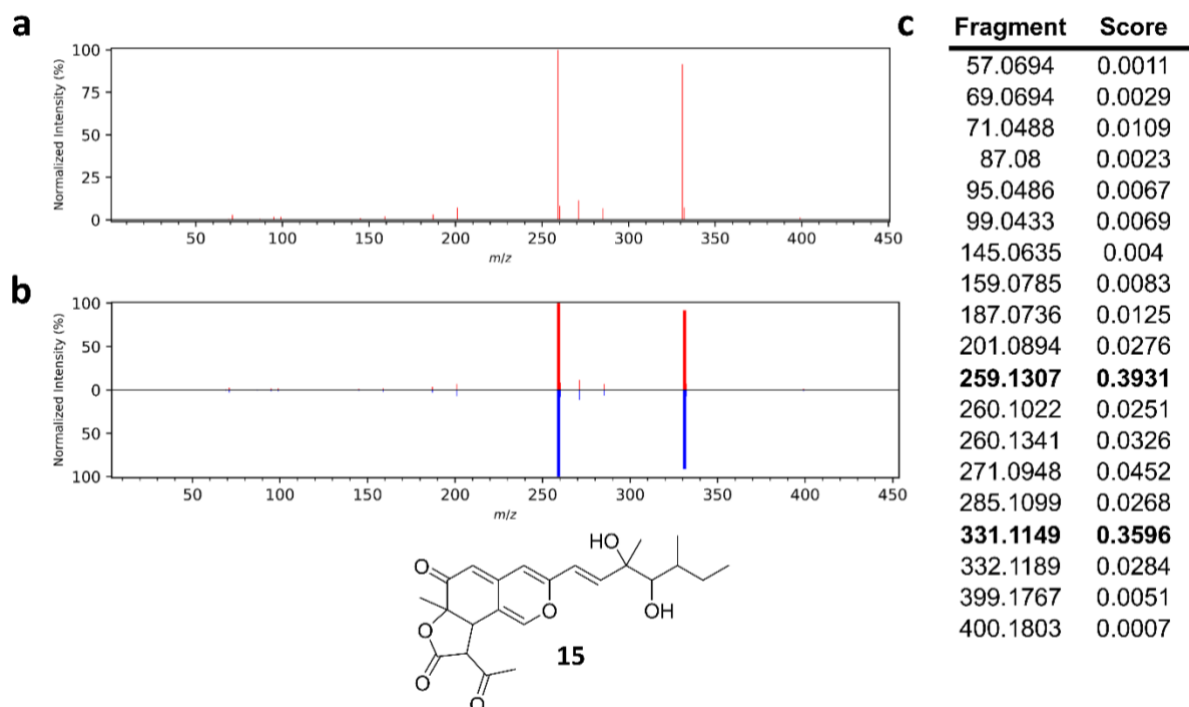

Annotation explanation: Its presence within cluster C of diol-azaphilones (compounds **7** and **14**) and its exact mass corresponding to the one reported in the literature for *Penicillium* sp. [1].

Figure S19: MS/MS information of compound **16** ( $m/z$  353.1963,  $-1.2$  ppm, level 3) from molecular network. (a) MS/MS spectrum of compound **16**, (b) the mirror plot of MS/MS spectra from compound **16** against itself with the main contributors to cosine score (bold), and (c) the fragment list and their contribution to cosine score.

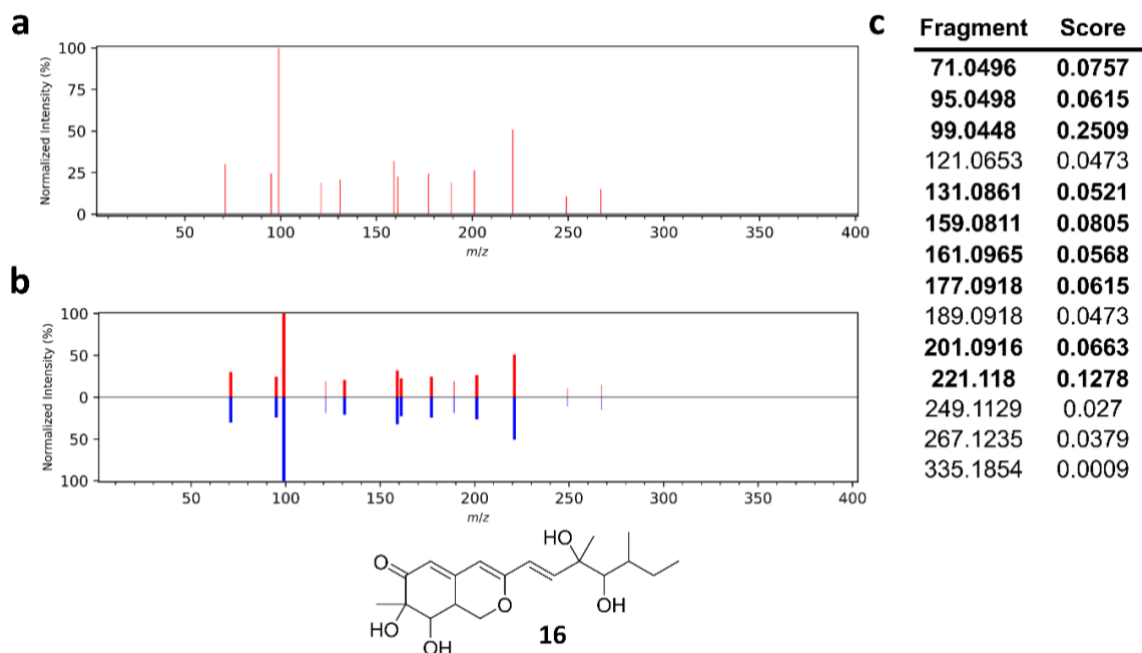

Annotation explanation: **16** presence within cluster C, its  $m/z$  difference of 2.0156 with compounds **7** and **14**, corresponding to a difference of  $H_2$  (loss of an unsaturation) and its exact mass corresponding to the one reported in the literature for *Penicillium* sp. [1]

Figure S20: MS/MS information of compound **17** ( $m/z$  387.1576,  $-1.8$  ppm, level 2) from molecular network. (a) MS/MS spectrum of compound **17**, (b) the mirror plot of MS/MS spectra from compound **17** against itself with the main contributors to cosine score (bold), and (c) the fragment list and their contribution to cosine score.

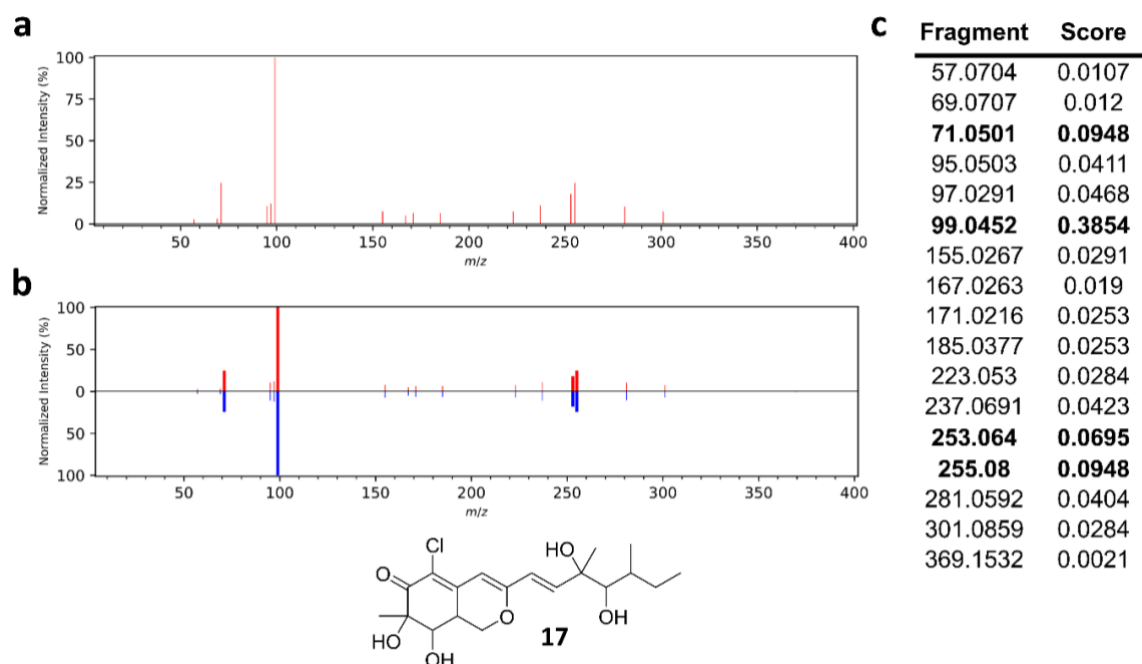

Annotation explanation: compound **17** presence within cluster C, its  $m/z$  difference of 2.0156 with compounds **7** and **14**, corresponding to a difference of  $H_2$  (loss of an unsaturation), its exact mass corresponding to the one reported in the literature for *Penicillium* sp. [1]

Figure S21: MS/MS information of compound **18** ( $m/z$  429.1675, 0.0 ppm, level 3) from molecular network. (a) MS/MS spectrum of compound **18**, (b) the mirror plot of MS/MS spectra from compound **18** against itself with the main contributors to cosine score (bold), and (c) the fragment list and their contribution to cosine score.

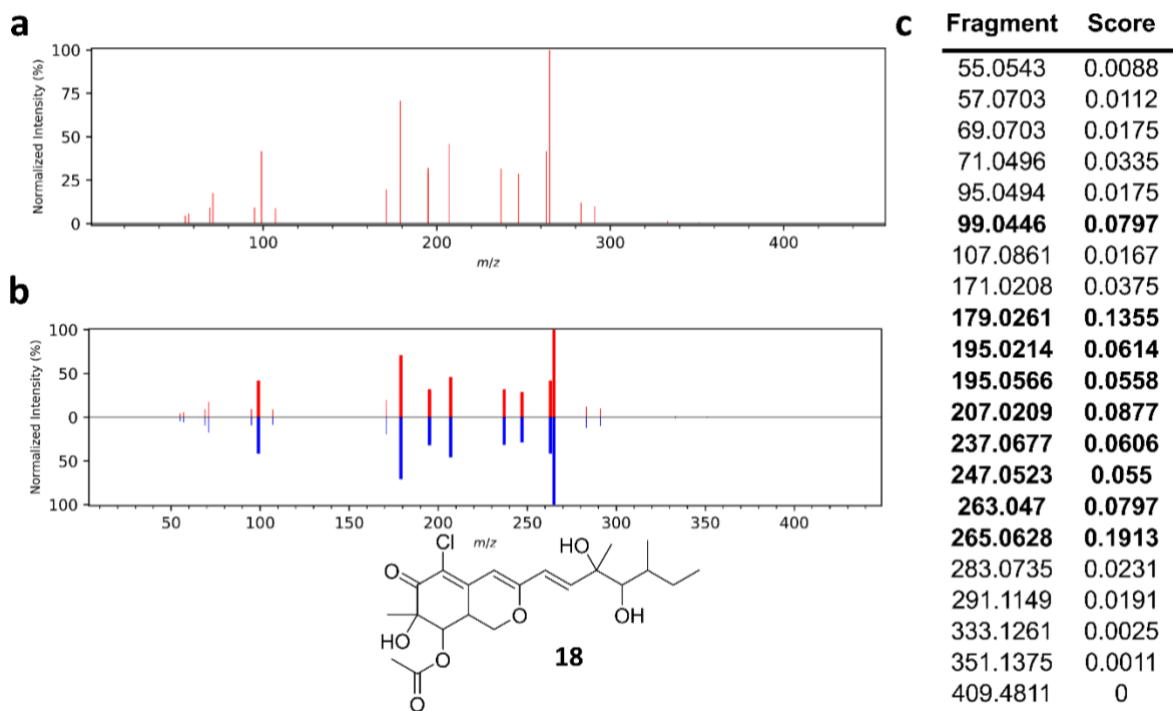

Annotation explanation: The spatial proximity within the t-SNE with compounds **16** and **17** and its exact mass corresponding to the one reported in the literature for *Penicillium sp.* [1].

Figure S22: MS/MS information of compound **19** ( $m/z$  490.2001,  $-2.1$  ppm, level 3) from molecular network. (a) MS/MS spectrum of compound **19**, (b) the mirror plot of MS/MS spectra from compound **19** against itself with the main contributors to cosine score (bold), and (c) the fragment list and their contribution to cosine score.

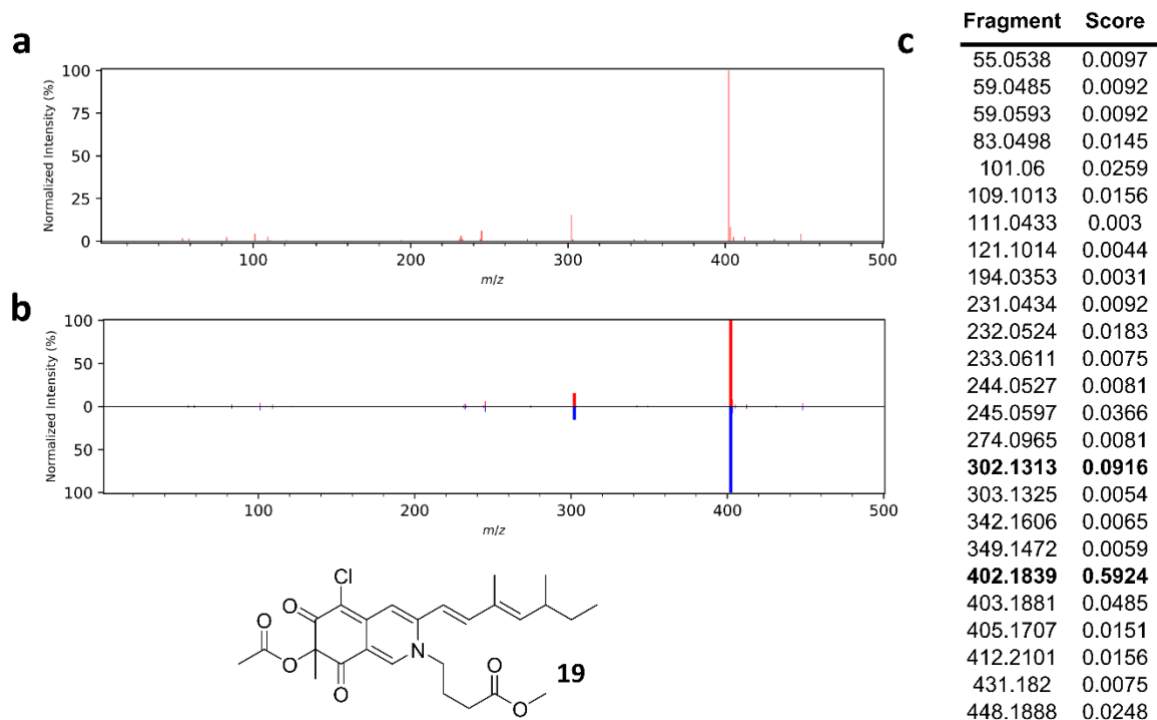

Figure S23: MS/MS information of compound **20** ( $m/z$  475.1989, 1.1 ppm, level 3) from molecular network. (a) MS/MS spectrum of compound **20**, (b) the mirror plot of MS/MS spectra from compound **20** against itself with the main contributors to cosine score (bold), and (c) the fragment list and their contribution to cosine score.

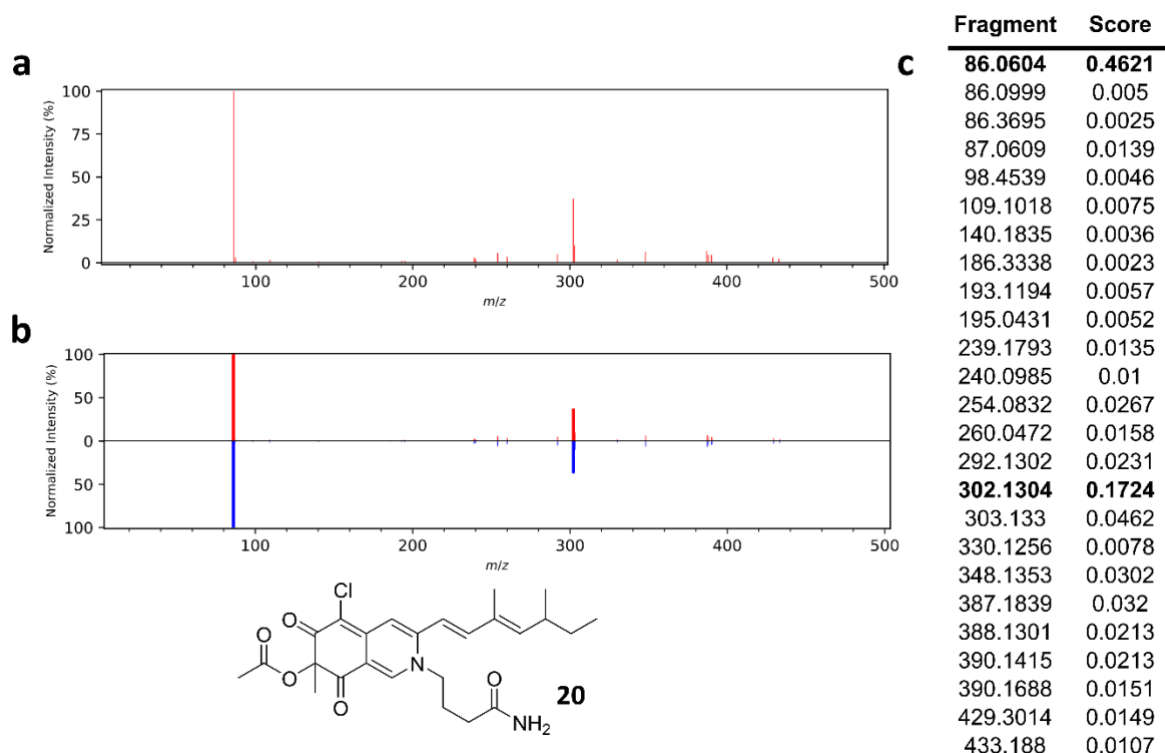

Annotation explanation: Its  $m/z$  difference with compound **6** is 0.9857, corresponding to O/NH conversion. This  $m/z$  difference was also observed for the fragment corresponding to the carbon chain attached to the nitrogen ( $m/z$  87.0438 for compound **6** and 86.0604 for compound **20**).

Figure S24: MS/MS information of compound **21** ( $m/z$  395.1627, -1.8 ppm, level 3) from molecular network. (a) MS/MS spectrum of compound **21**, (b) the mirror plot of MS/MS spectra from compound **21** against itself with the main contributors to cosine score (bold), and (c) the fragment list and their contribution to cosine score.

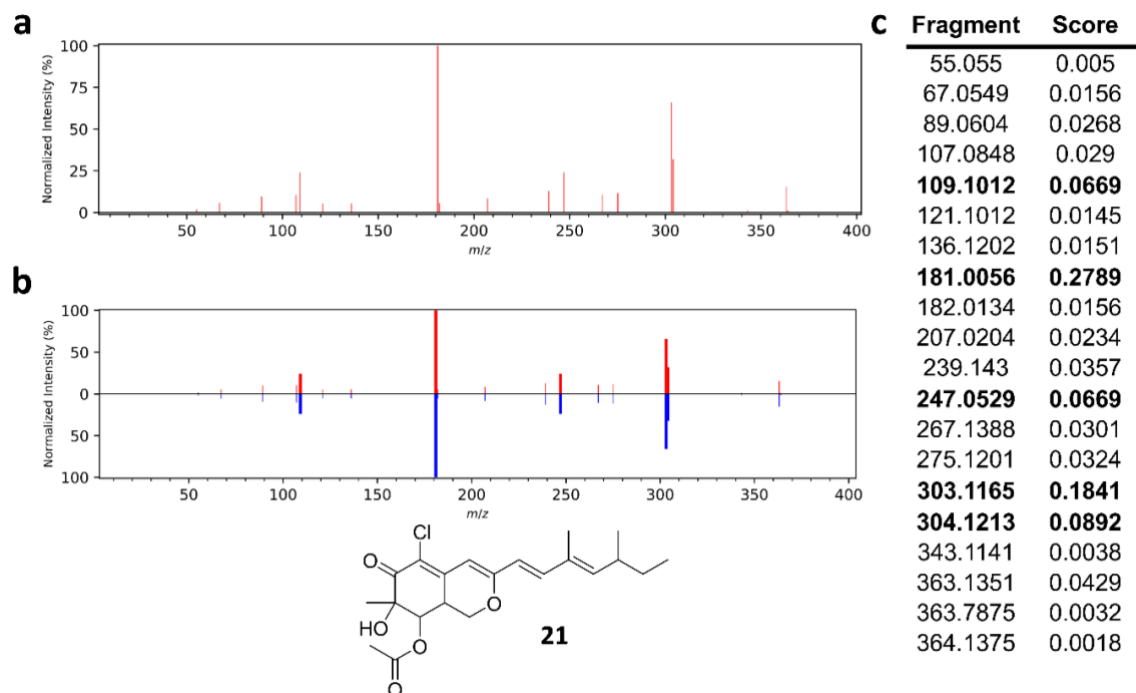



Figure S25: MS/MS information of compound **22** ( $m/z$  405.1467,  $-0.9$  ppm, level 2) from molecular network. (a) MS/MS spectrum of compound **22**, (b) the mirror plot of MS/MS spectra from compound **22** against itself with the main contributors to cosine score (bold), and (c) the fragment list and their contribution to cosine score.

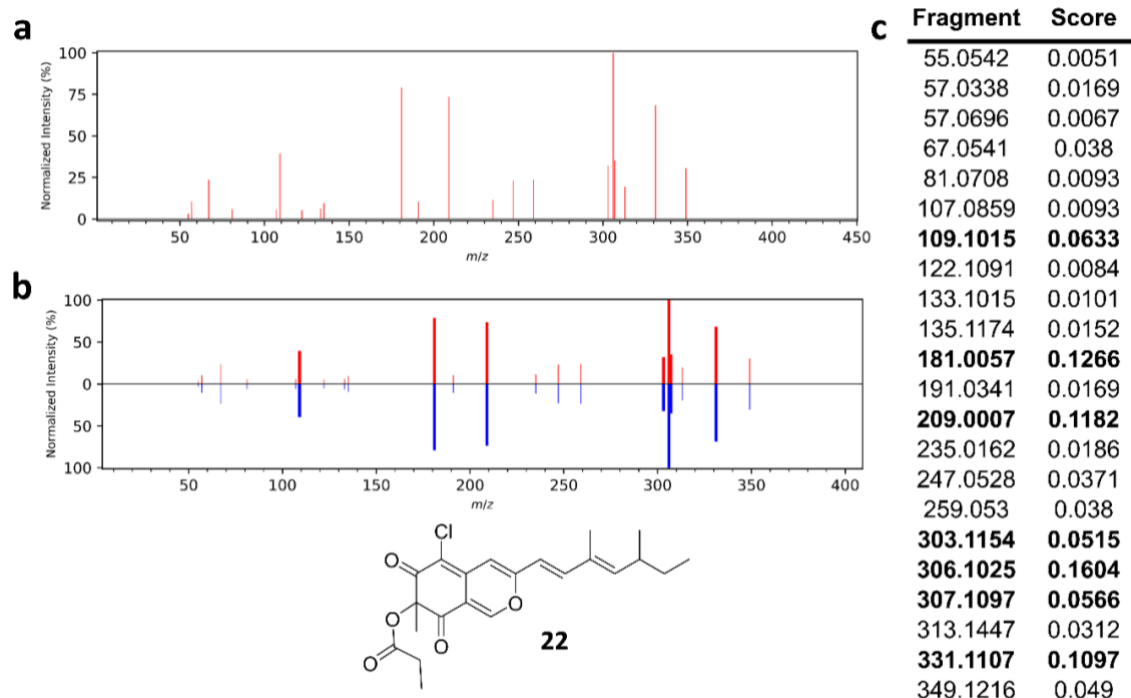

Annotation explanation: Its homology of 0.90 with compound **1**, and its  $m/z$  difference of 14.0158 corresponding to the addition of a  $\text{CH}_2$ .

Figure S26: MS/MS information of compound **23** ( $m/z$  415.1312,  $-1.3$  ppm, level 0) from molecular network. (a) MS/MS spectrum of compound **23**, (b) the mirror plot of MS/MS spectra from compound **23** against itself with the main contributors to cosine score (bold), and (c) the fragment list and their contribution to cosine score.

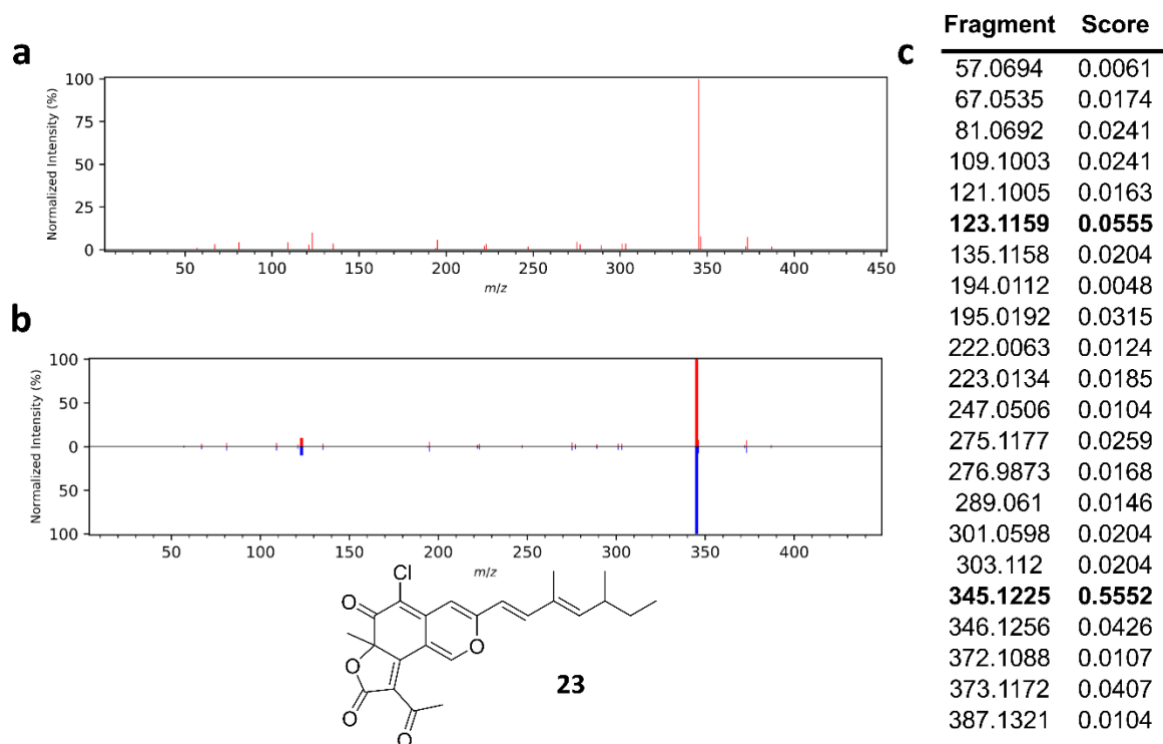

Annotation explanation: Its  $m/z$  difference of 2.0156 with compound **4**, that correspond to a difference of  $H_2$  (loss of an unsaturation).

Figure S27: MS/MS information of compound **24** ( $m/z$  357.1705,  $-2.4$  ppm, level 2) from molecular network. (a) MS/MS spectrum of compound **24**, (b) the mirror plot of MS/MS spectra from compound **24** with compound **1** with neutral losses from acetylation (bold), and (c) the common fragments and neutral losses with their contribution to cosine score.

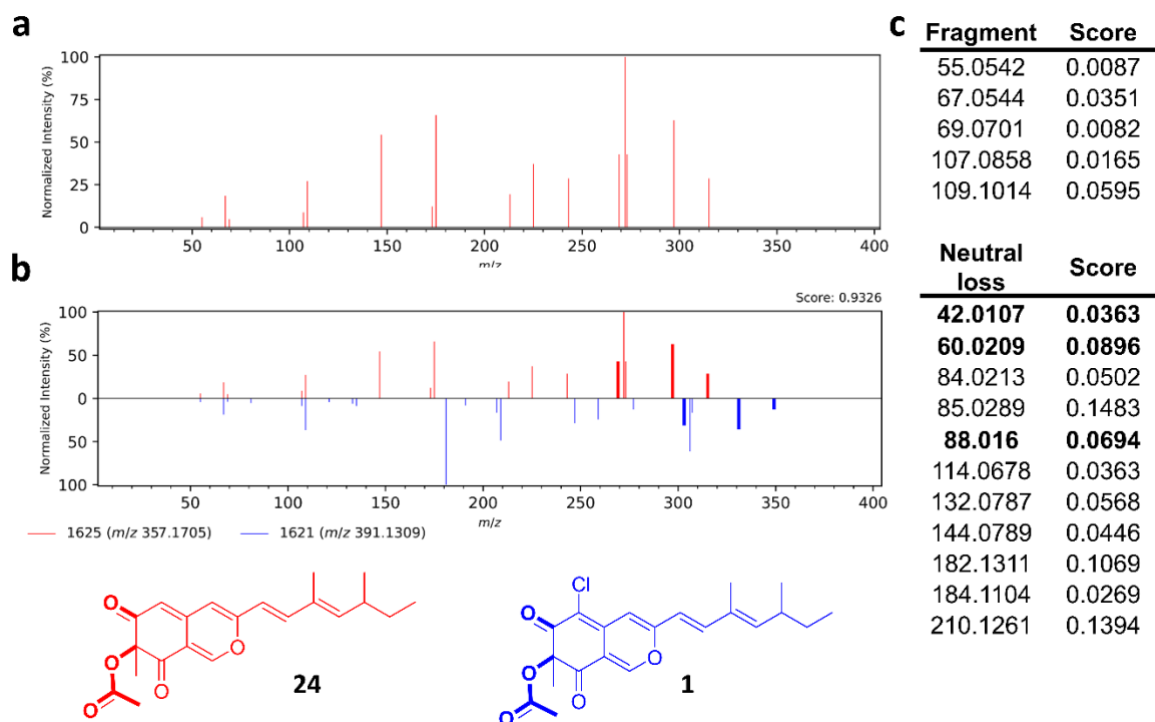

Figure S28: MS/MS information of compound **25** ( $m/z$  371.1862,  $-2.4$  ppm, level 2) from molecular network. (a) MS/MS spectrum of compound **25**, (b) the mirror plot of MS/MS spectra from compound **25** with compound **22** with neutral losses from propionylation (bold), and (c) the common fragments and neutral losses with their contribution to cosine score.

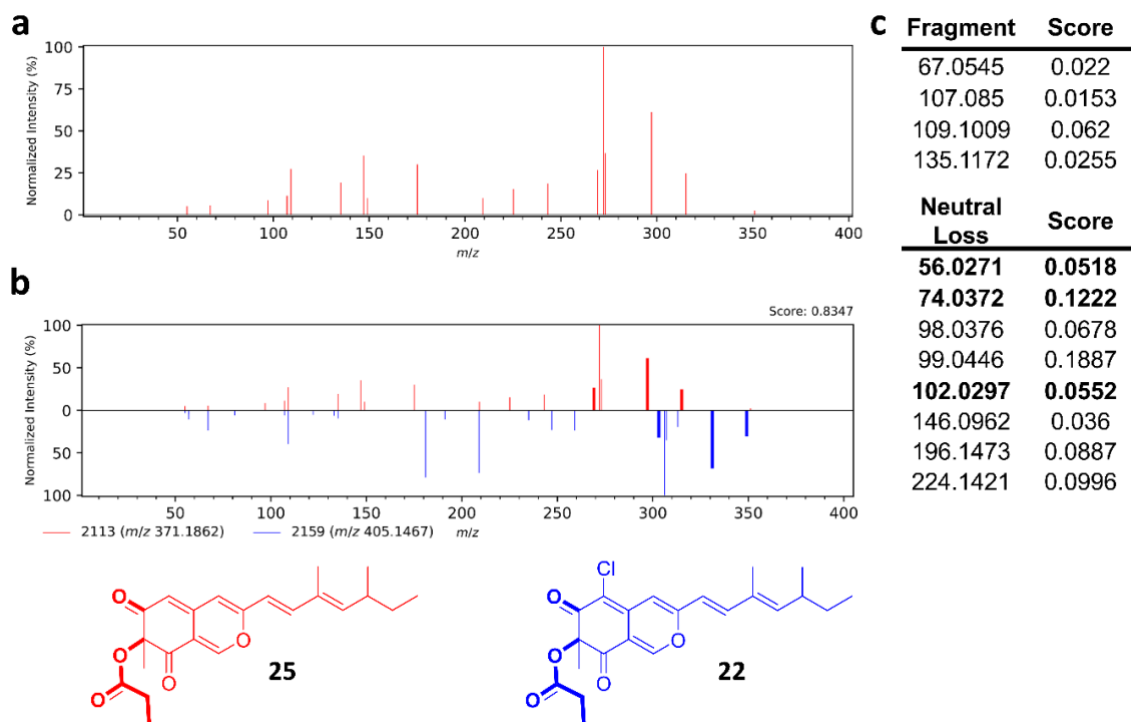

Figure S29: MS/MS information of compound **26** ( $m/z$  419.1619, 0.2 ppm,  $t_R$  = 16.44 min, level 3) from molecular network. (a) MS/MS spectrum of compound **26**, (b) the mirror plot of MS/MS spectra from compound **26** with compound **1** with fragment from acylation loss (bold), and (c) the common fragments with their contribution to cosine score.

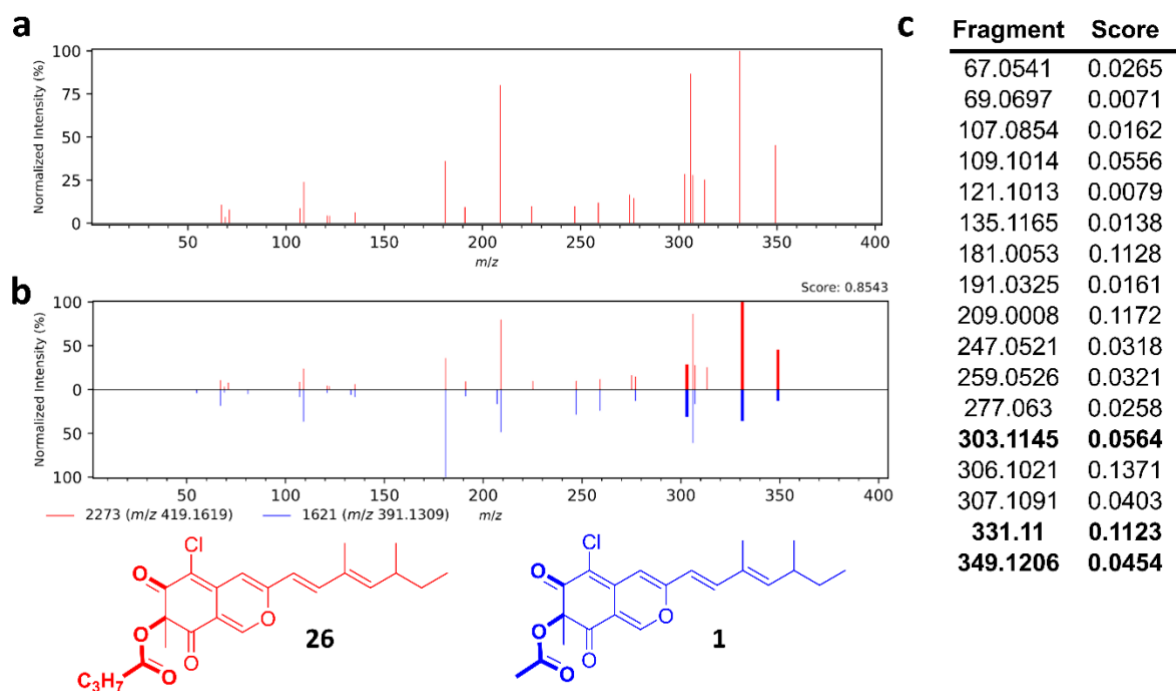

Annotation explanation: Its MS/MS comparison with compound **1** exhibits common fragments of  $m/z$  349.1206, 331.1100, 303.1145, its elution 0.72 min after compound **22**, and 1.49 min after compound **1**.

Figure S30: MS/MS information of compound **27** ( $m/z$  385.2018,  $-2.2$  ppm,  $t_R = 15.32$  min, level 3) from molecular network. (a) MS/MS spectrum of compound **27**, (b) the mirror plot of MS/MS spectra from compound **27** with compound **26** with neutral losses from butanoylation loss (bold) and (c) the common fragments and neutral losses with their contribution to cosine score.

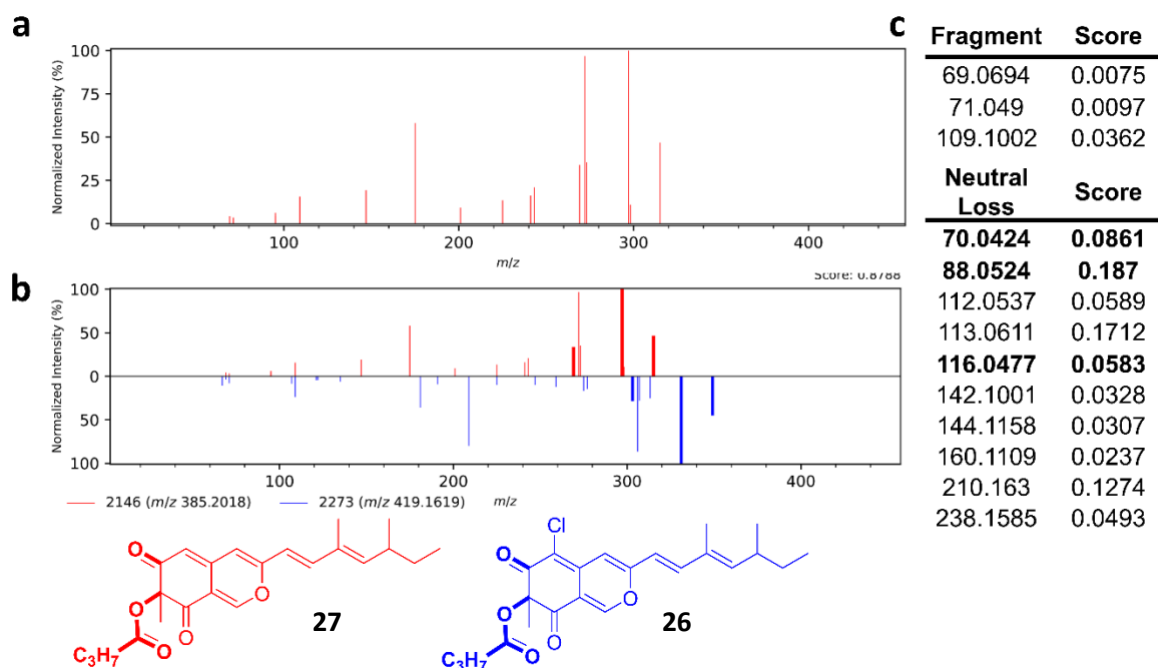

Annotation explanation: Its MS/MS comparison with compound **26** exhibits neutral losses of 70.0424, 88.0524, 116.0477 Da, its elution 0.84 min after **26**, and 1.65 min after compound **25** supported its annotation.

Figure S31: MS/MS information of compound **28** ( $m/z$  433.1777,  $-0.2$  ppm,  $t_R$  = 17.15 min, level 3) from molecular network. (a) MS/MS spectrum of compound **28**, (b) the mirror plot of MS/MS spectra from compound **28** against compound **1** with fragment from acylation loss (bold) and (c) the common fragments and neutral loss with their contribution to cosine score.

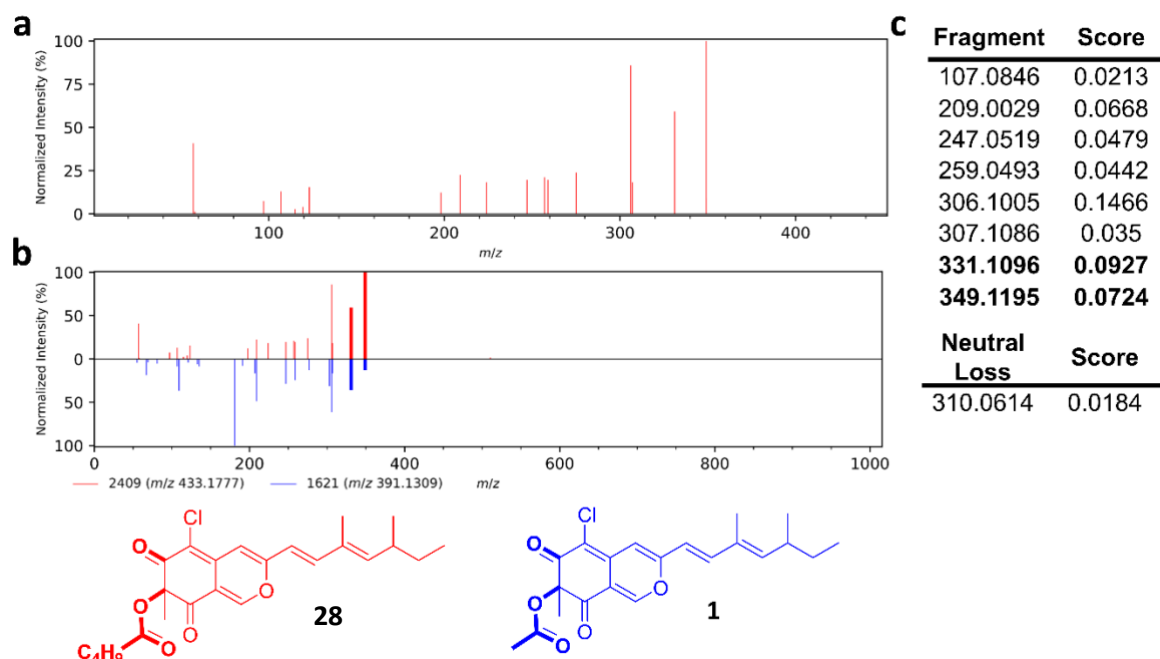

Raw MS/MS spectra from compound **28** from  $m/z$  255 to 375.

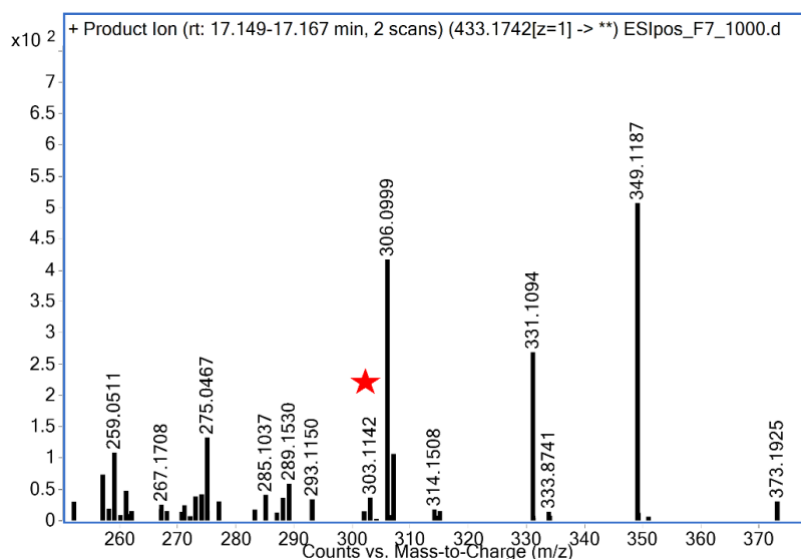

Annotation explanation: Its MS/MS comparison with **1** exhibits common fragments of  $m/z$  349.1206 and 331.1100. Fragment C ( $m/z$  303.1100, red star) was not found within MS/MS spectra in the molecular network but was found within raw data. Its exclusion is explained by the processing parameters to construct a molecular network, that excludes less intense pics in certain  $m/z$  windows. Compound **28** elutes 0.69 min after compound **22**, 1.43 min after compound **22**, and 2.20 min after compound **1**.

Figure S32: MS/MS information of compound **29** ( $m/z$  399.2169,  $-0.8$  ppm,  $t_R$  = 16.09 min, level 3) from molecular network. (a) MS/MS spectrum of compound **29**, (b) the mirror plot of MS/MS spectra from compound **29** against compound **24** with fragments from acylation loss (bold) and (c) the common fragments with their contribution to cosine score.

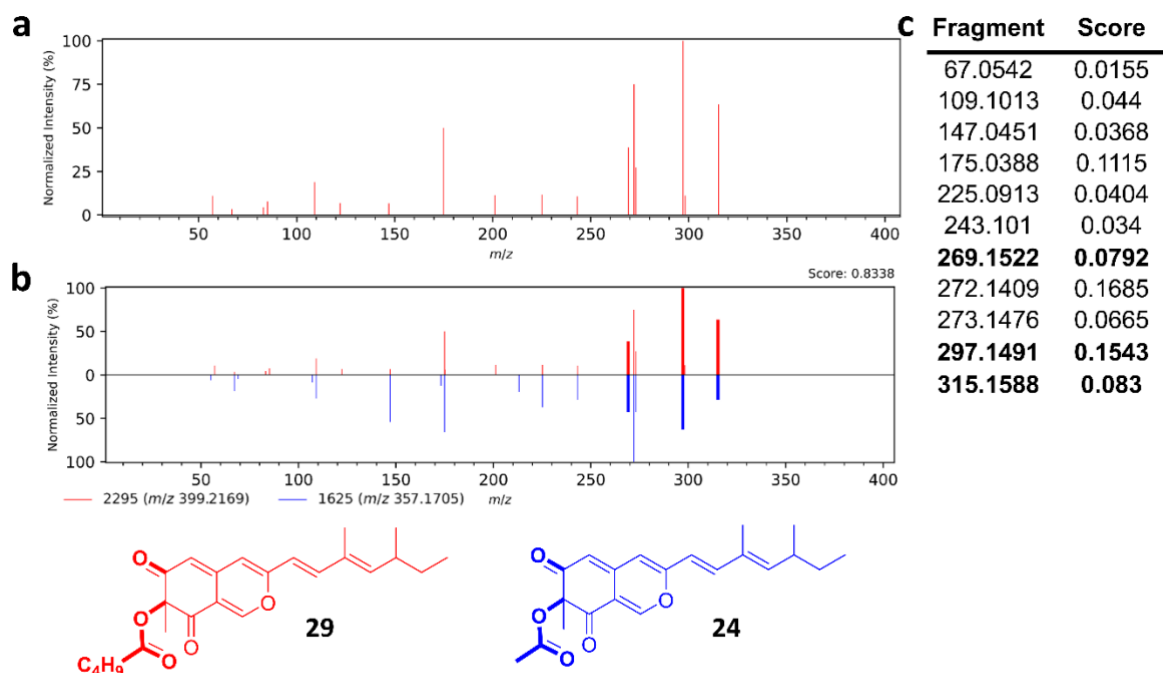

Annotation explanation: Its MS/MS comparison with compound **24** exhibiting common fragments of  $m/z$  315.588, 297.1491, 269.1522, and its elution 0.77 min after compound **27**, 1.59 min after compound **25** and 2.41 min after compound **24** explained its annotation.

Figure S33: MS/MS information of compound **30** ( $m/z$  349.1205,  $-1.1$  ppm,  $t_R = 13.09$  min, level 2) from molecular network. (a) MS/MS spectrum of compound **30**, (b) the mirror plot of MS/MS spectra from compound **30** against compound **1**, (c) the common fragments and neutral losses with their contribution to cosine score.

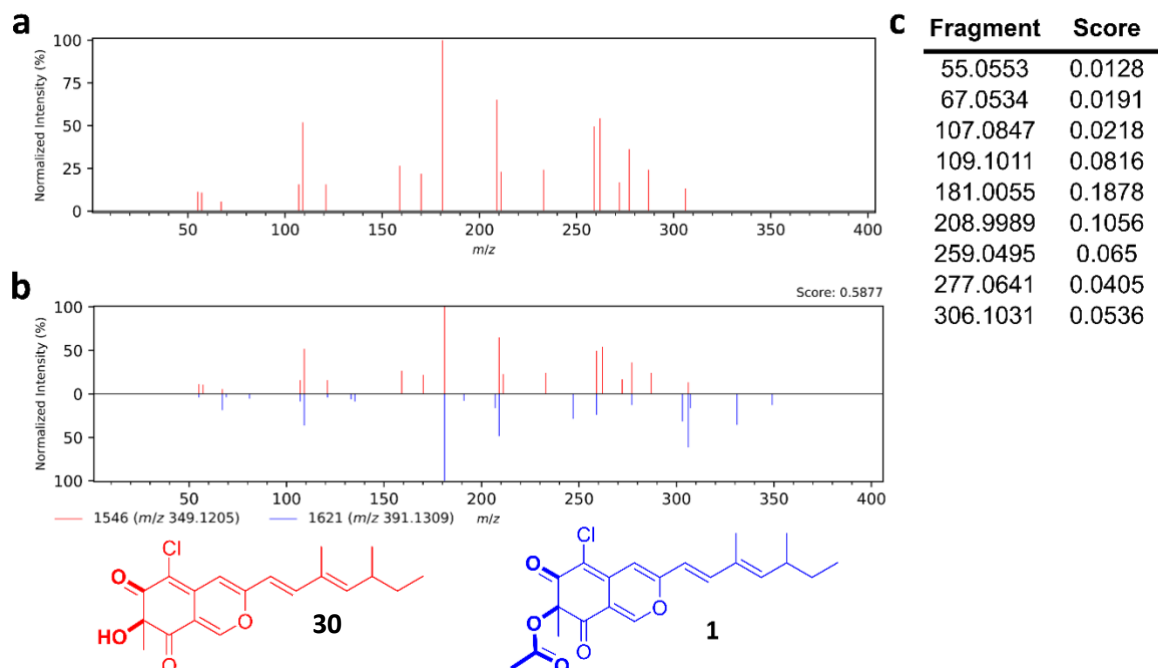

MS/MS spectrum of compound **30** with a zoom on  $m/z$  from 295 to 355.

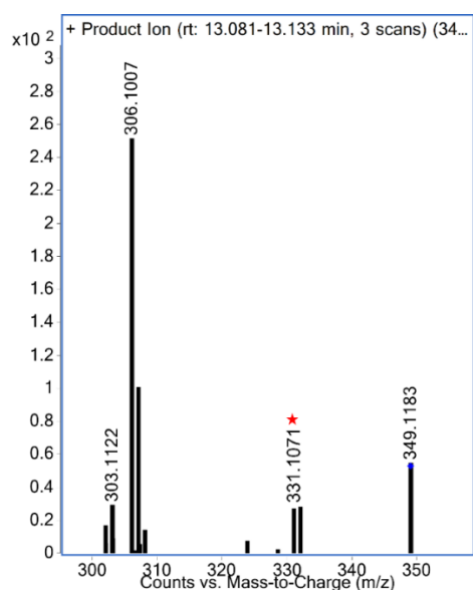

Annotation explanation: the exact mass of compound **30** corresponded to fragment A, compound **30** clustered with compound **1** on molecular network. No fragment B and C were to be found within processed data for molecular network but inspection of raw data confirmed the presence of fragment B ( $m/z$  331.1071) and C ( $m/z$  303.1122) (red star)



Figure S34: MS/MS information of compound **31** ( $m/z$  315.1594,  $-1.0$  ppm,  $t_R = 11.97$  min, level 3) from molecular network. (a) MS/MS spectrum of compound **31**, (b) the mirror plot of MS/MS spectra from compound **31** against compound **24** (c) the common fragments with their contribution to cosine score.

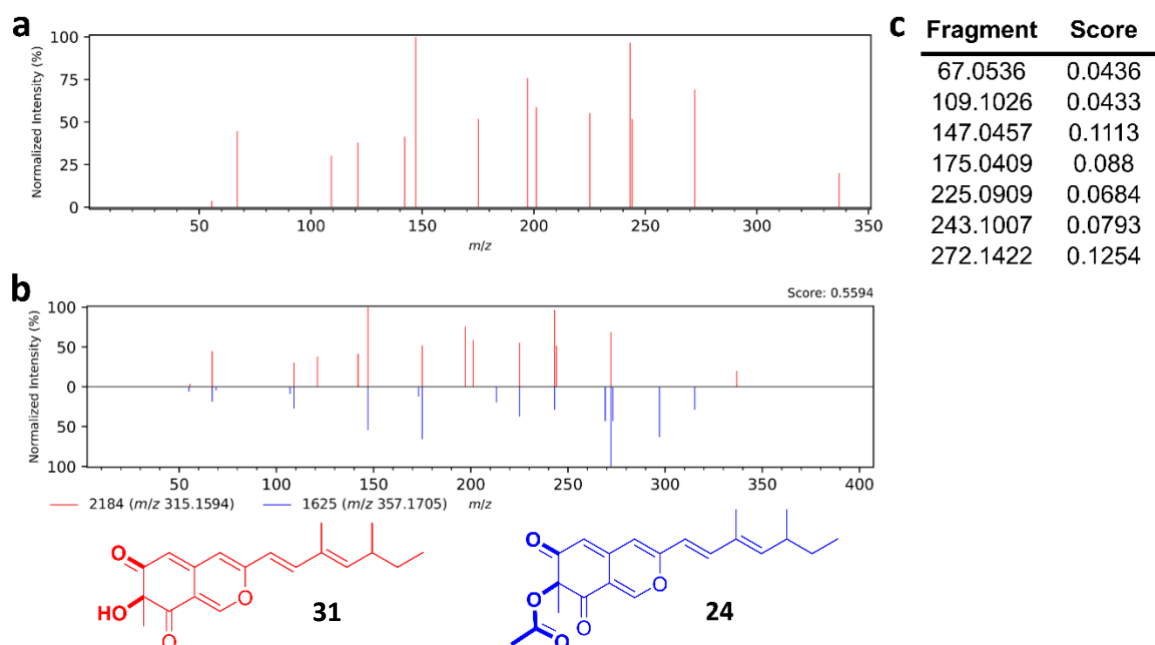

Annotation explanation: Despite being excluded from the t-SNE, its cosine scores against compounds **30** and **24**, its two closer annotated structural analogs were 0.53 and 0.56. Moreover, fragment D ( $m/z$  147.0457) is found within MS/MS data of compound **31**.

Figure S35: MS/MS information of compound **32** ( $m/z$  359.1859,  $-1.7$  ppm, level 3) from molecular network. (a) MS/MS spectrum of compound **32**, (b) the mirror plot of MS/MS spectra from compound **31** against compound **24** (c) the common fragments and neutral losses with their contribution to cosine score.

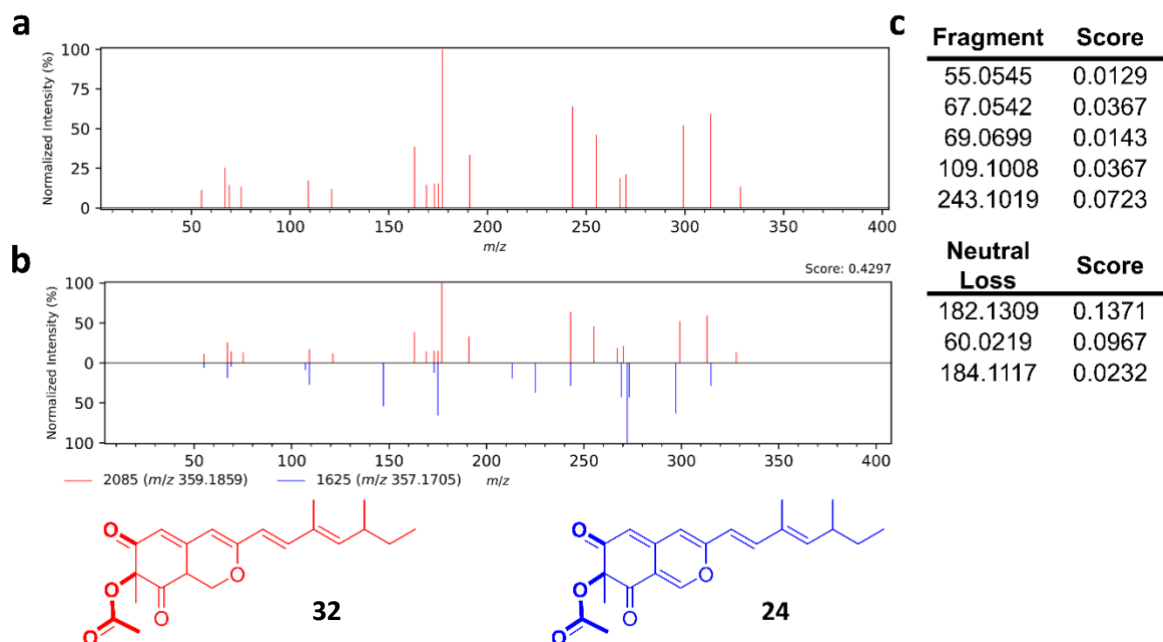

Annotation explanation: compound **32** calculated molecular formula was  $C_{21}H_{26}O_5$ . Annotation as an analog of compound **24** with one less insaturation was favoured, as this scaffold is reported for some azaphilones like compound **17**.

Figure S36: MS/MS information of compound **33** ( $m/z$  419.1864,  $-2.6$  ppm, level 2) from molecular network. (a) MS/MS spectrum of compound **33**, (b) the mirror plot of MS/MS spectra from compound **33** against compound **36** with fragment from acylation loss (bold) (c) the common fragments and neutral losses with their contribution to cosine score.

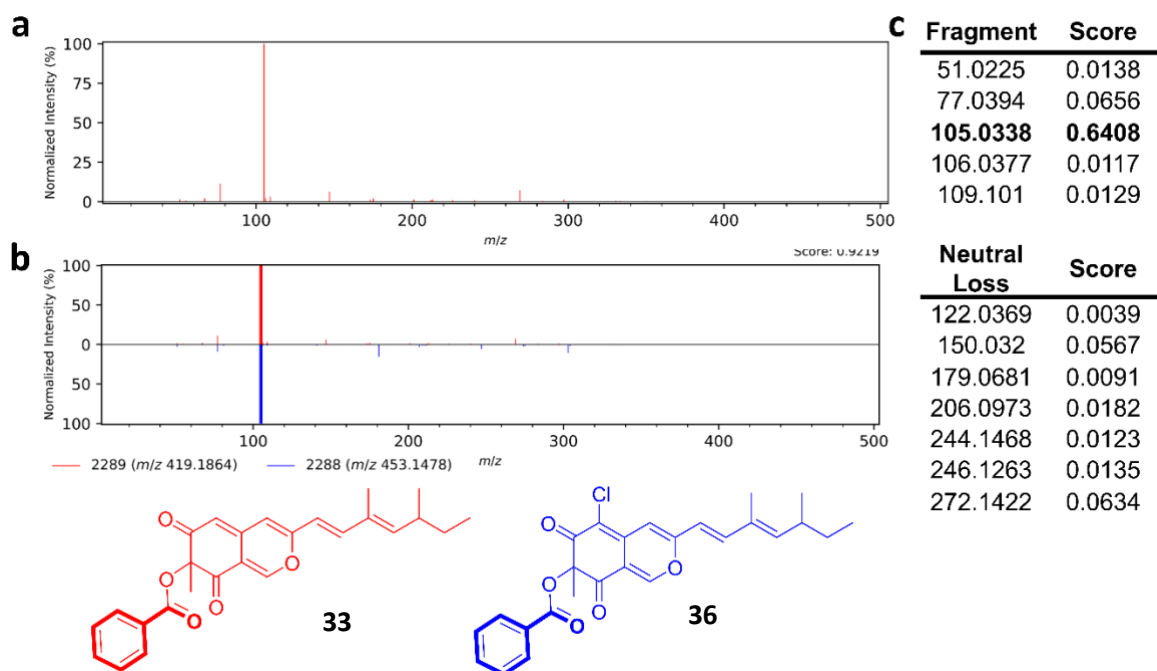

Figure S37: MS/MS information of compound **34** ( $m/z$  468.1575,  $-0.6$  ppm, level 2) from molecular network. (a) MS/MS spectrum of compound **34**, (b) the mirror plot of MS/MS spectra from compound **34** against compound **36** with fragment from azaphilone scaffold loss (bold) (c) the common fragments and neutral losses with their contribution to cosine score.

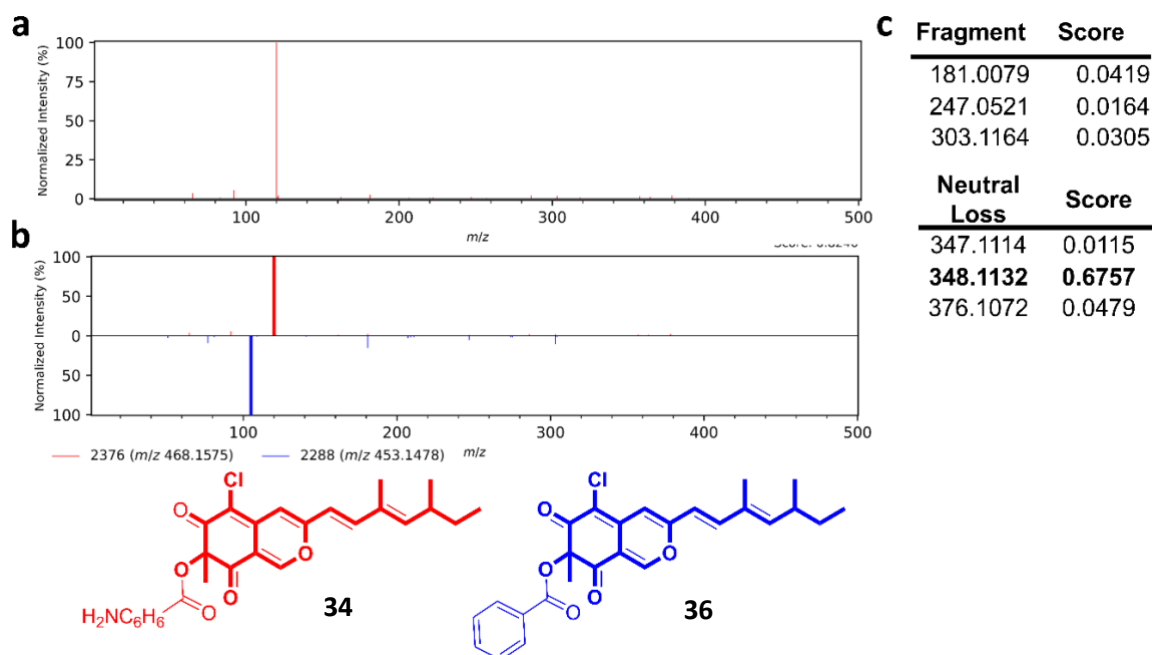

Annotation explanation: In a similar fashion to compound **36** its most intense fragment correspond to the aminobenzoyl.

Figure S38: MS/MS information of compound **35** ( $m/z$  407.1265,  $-2.2$  ppm, level 3) from molecular network. (a) MS/MS spectrum of compound **35** (b) the mirror plot of MS/MS spectra from compound **35** against compound **1** with fragments from acylation loss (bold) (c) the common fragments with their contribution to cosine score.

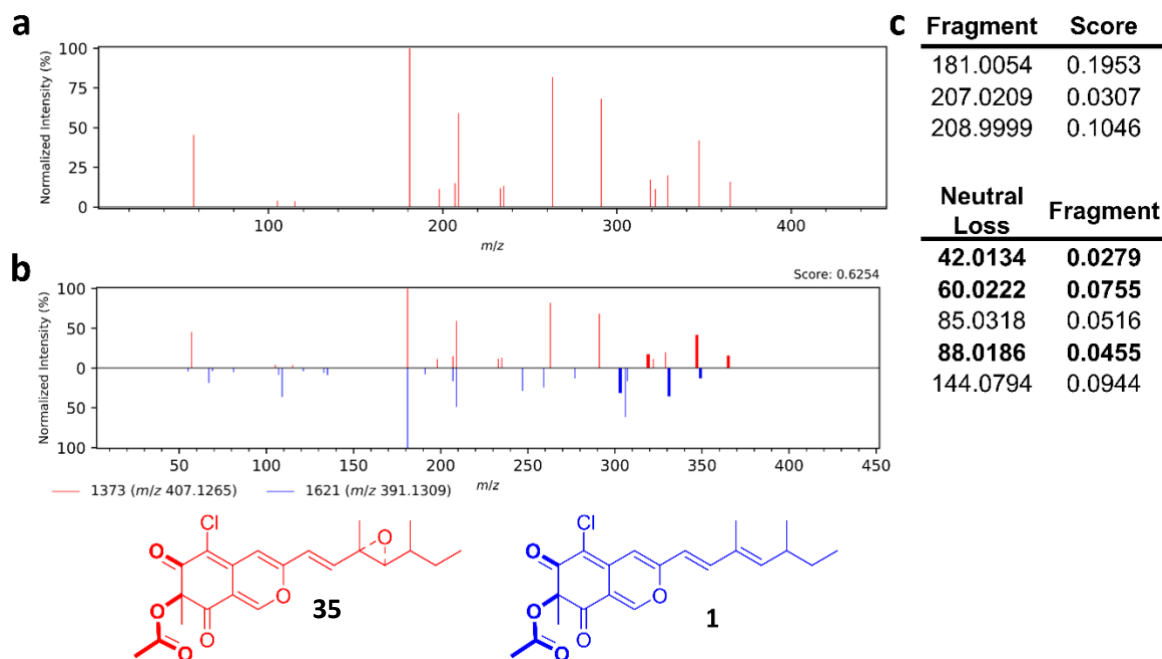

Annotation explanation: The neutral losses A, B C from the acetylation of compound **35**. An intense common fragment D ( $m/z$  181.0054) with other compound **1**'s analogs was found within compound **35** MS/MS spectra explaining the positioning of the epoxydation.

Figure S39: MS/MS information of compound **36** ( $m/z$  453.1458, 1.2 ppm, level 2) from molecular network. (a) MS/MS spectrum of compound **36**, (b) the mirror plot of MS/MS spectra from compound **36** against compound **1** with fragment from acylation loss (bold) (c) the common fragments with their contribution to cosine score.

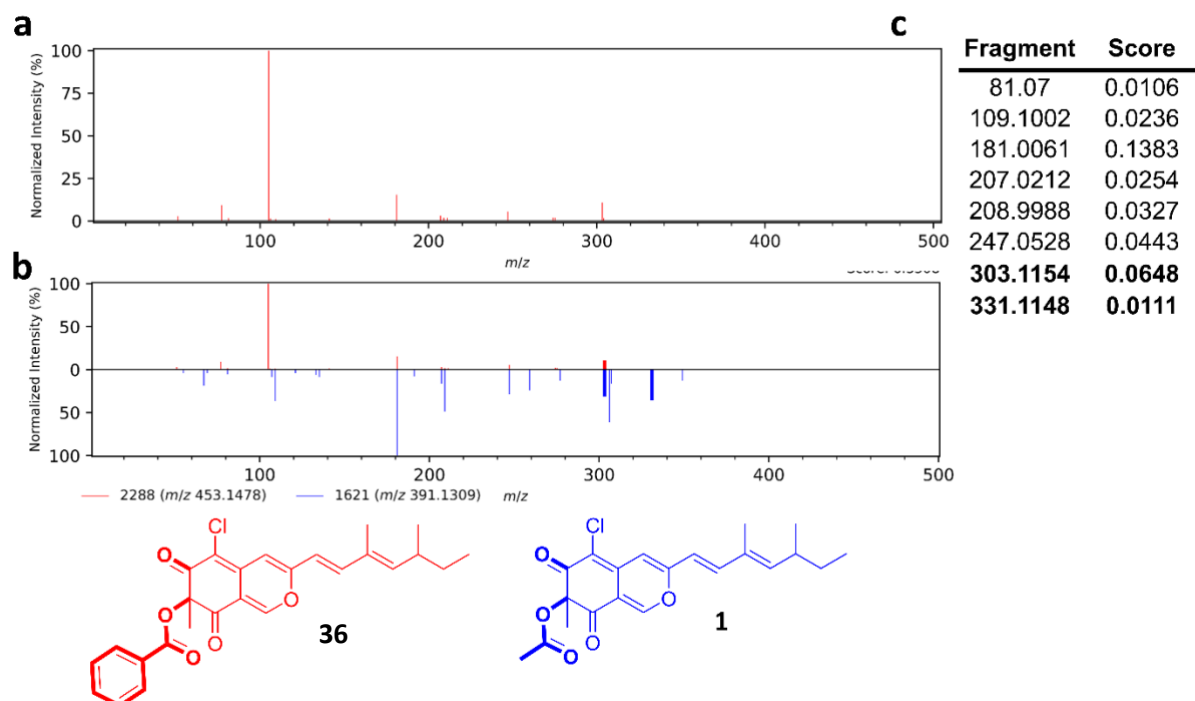

Annotation explanation: The neutral loss of the acylation indicates a benzaldehyde loss, and its expected 105.0336 Da was found within MS/MS spectra.

Figure S40: MS/MS information of compound **37** ( $m/z$  363.1360,  $-0.7$  ppm,  $t_R = 14.58$  min, level 2) from molecular network. (a) MS/MS spectrum of compound **37**, (b) the mirror plot of MS/MS spectra from compound **37** against compound **22** with fragment from acylation loss (bold) (c) the common fragments with their contribution to cosine score.

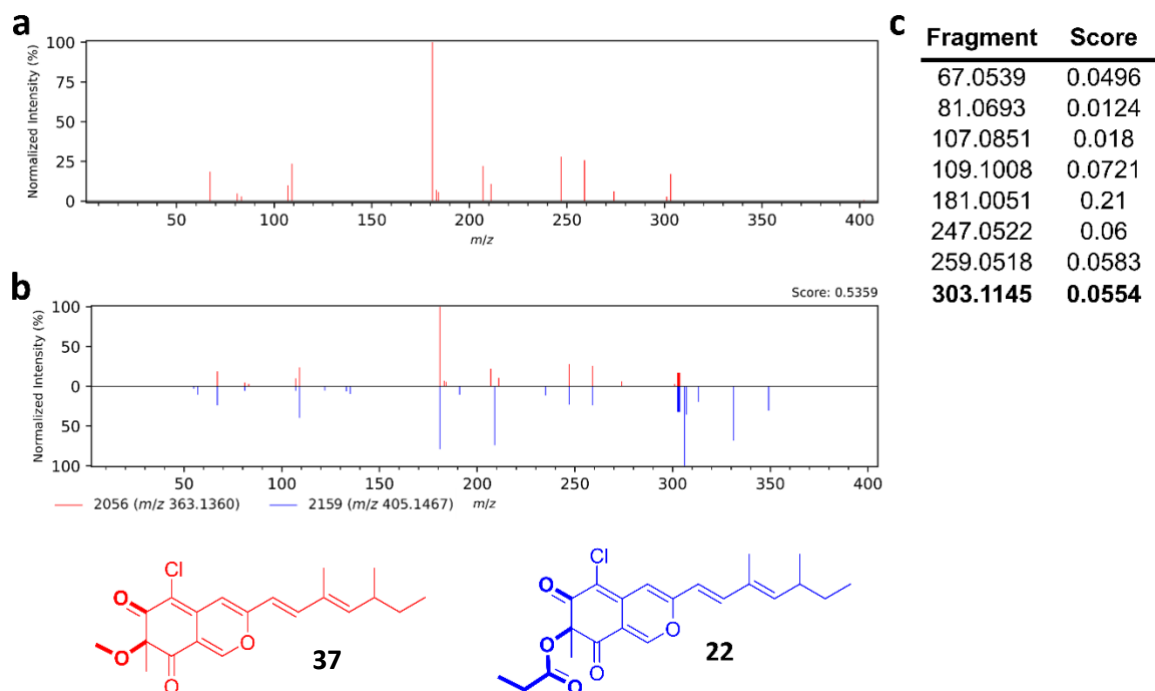

Annotation explanation: the presence of specific fragment C, compound **37** exact mass and its presence in cluster A.

Figure S41: MS/MS information of compound **38** ( $m/z$  435.1575,  $-1.4$  ppm, level 3) from molecular network. (a) MS/MS spectrum **38**, (b) the mirror plot of MS/MS spectra from compound **38** against compound **26** with fragments from acylation loss (bold) (c) the common fragments with their contribution to cosine score.

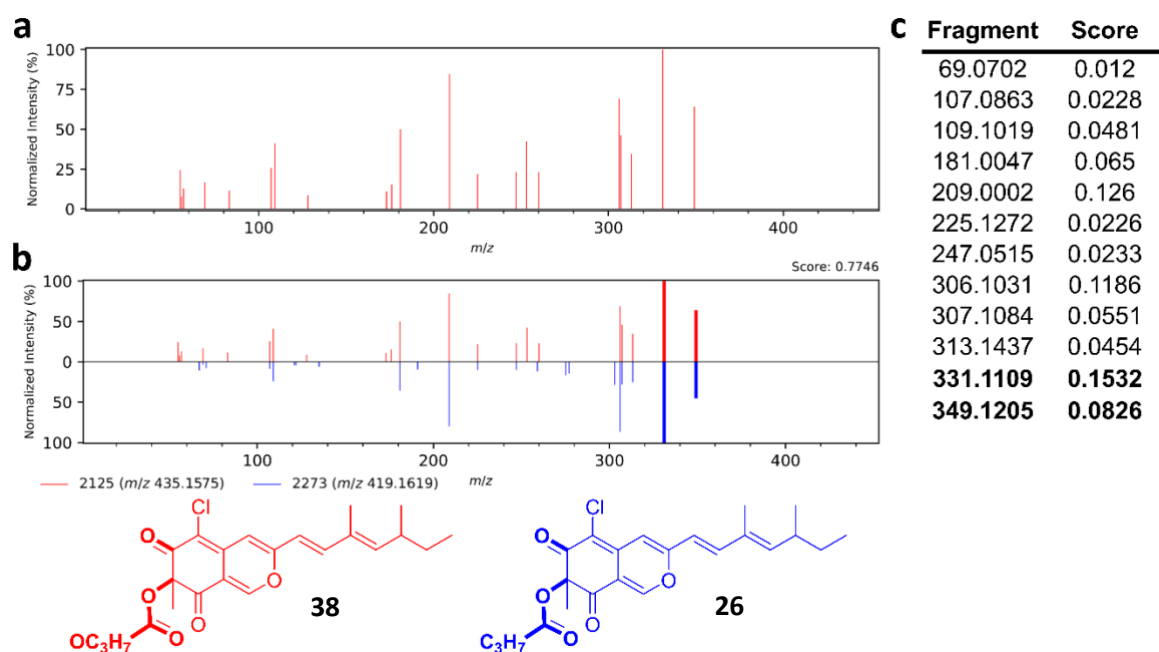



Figure S42: MS/MS information of compound **39** ( $m/z$  452.1631,  $-1.8$  ppm, level 2) from molecular network. (a) MS/MS spectrum of compound **39**, (b) the mirror plot of MS/MS spectra from compound **39** against compound **36** with neutral losses from benzaldehyde loss (bold) (c) the common fragments and neutral losses with their contribution to cosine score.

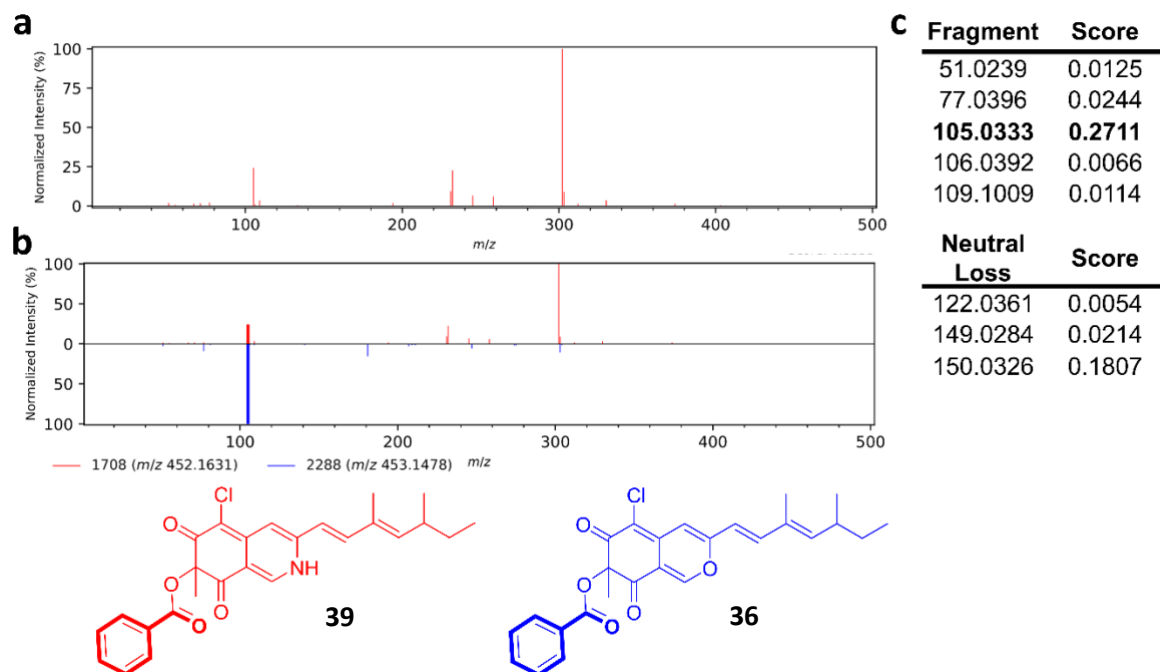

Figure S43: MS/MS information of compound **40** ( $m/z$  434.1734,  $-1.2$  ppm, level 3) from molecular network. (a) MS/MS spectrum of compound **40**, (b) the mirror plot of MS/MS spectra from compound **40** against compound **38** with neutral losses from acylation loss (bold) (c) the common fragments and neutral losses with their contribution to cosine score.

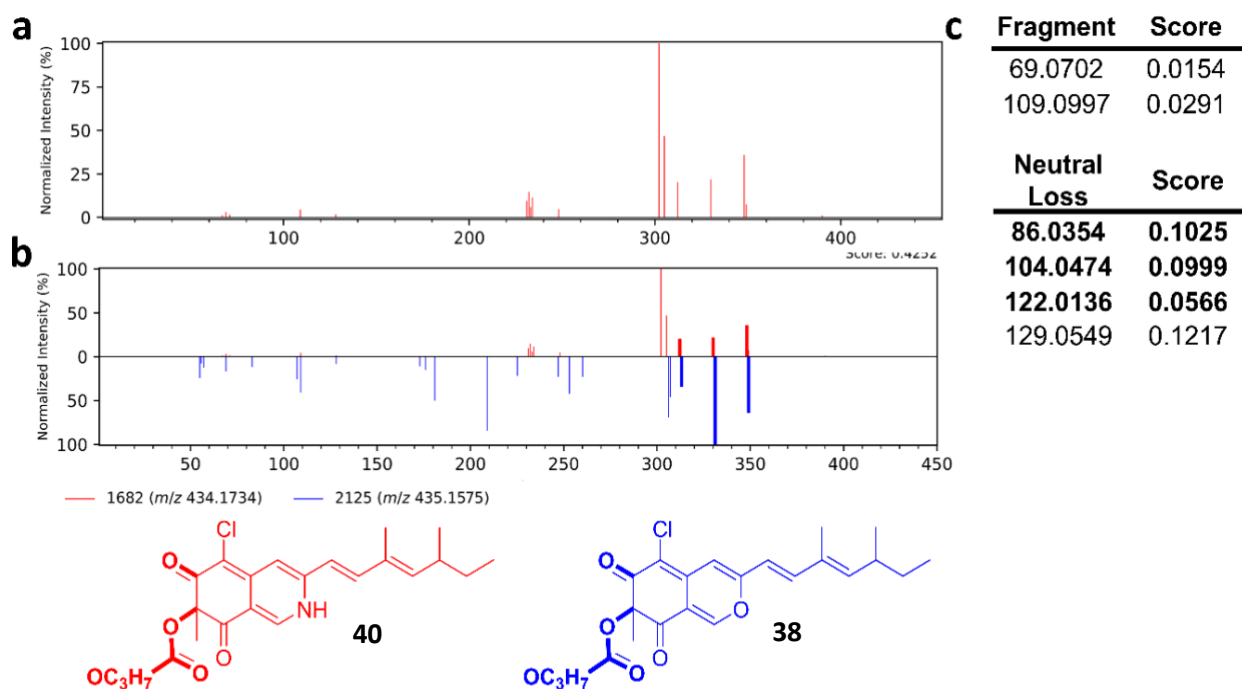

Figure S44: MS/MS information of compound **41** ( $m/z$  356.1862,  $-1.6$  ppm, level 2) from molecular network. (a) MS/MS spectrum of compound **41**, (b) the mirror plot of MS/MS spectra from compound **41** with compound **2** with neutral losses from acetylation (bold), and (c) the common fragments and neutral losses with their contribution to cosine score.

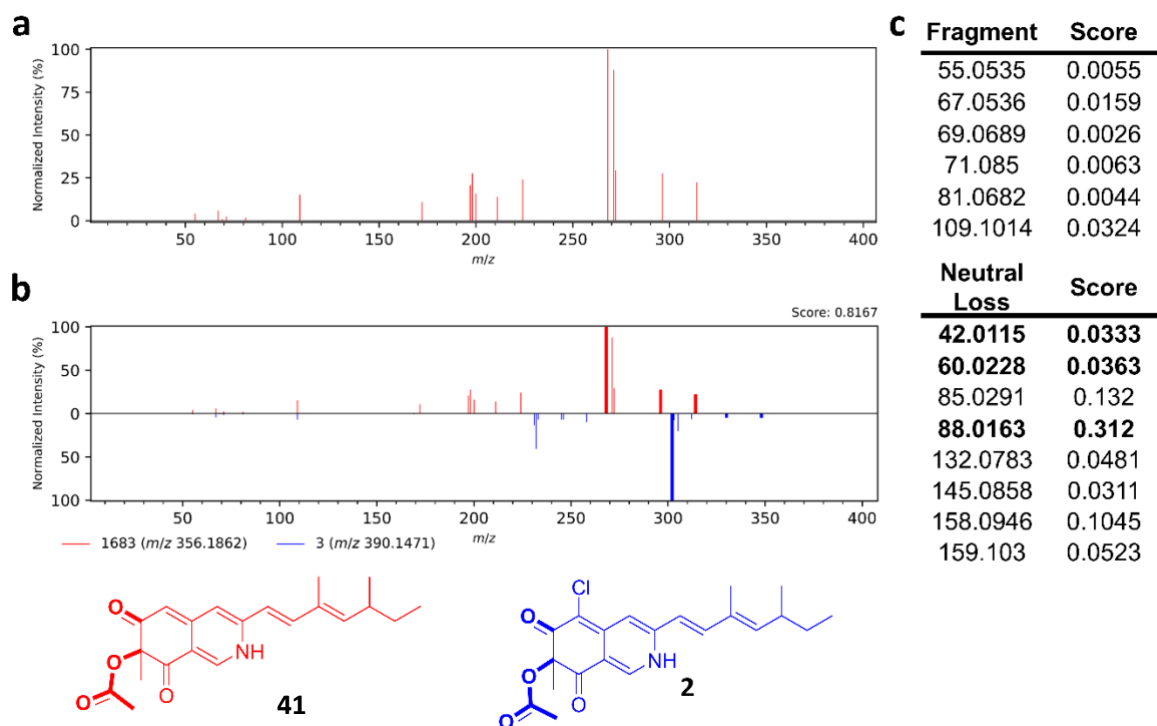

Figure S45: MS/MS information of compound **42** ( $m/z$  404.1626,  $-0.7$  ppm, level 2) from molecular network. (a) MS/MS spectrum of compound **42**, (b) the mirror plot of MS/MS spectra from compound **42** with compound **22** with neutral losses from propionylation (bold), and (c) the common fragments and neutral losses with their contribution to cosine score.

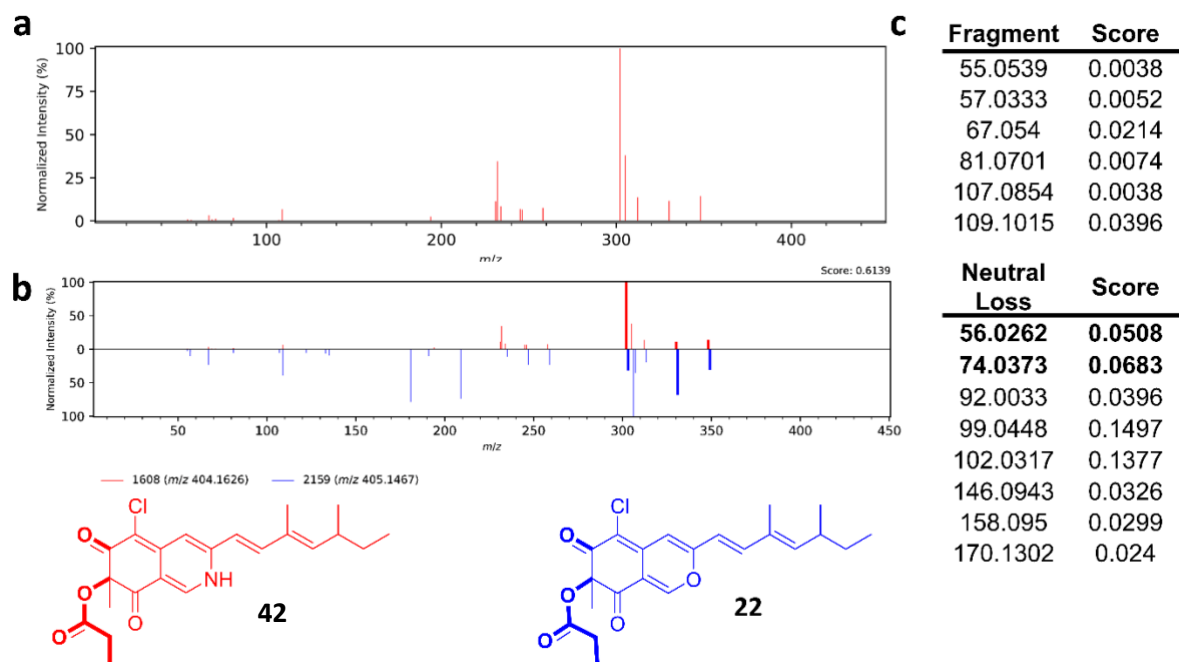

Figure S46: MS/MS information of compound **43** ( $m/z$  362.1524,  $-1.8$  ppm,  $t_R = 11.12$  min, level 2) from molecular network.

(a) MS/MS spectrum of compound **43**, (b) the mirror plot of MS/MS spectra from compound **43** against Sclerotioramine **2** with fragment from acylation loss (bold) (c) the common fragments with their contribution to cosine score.

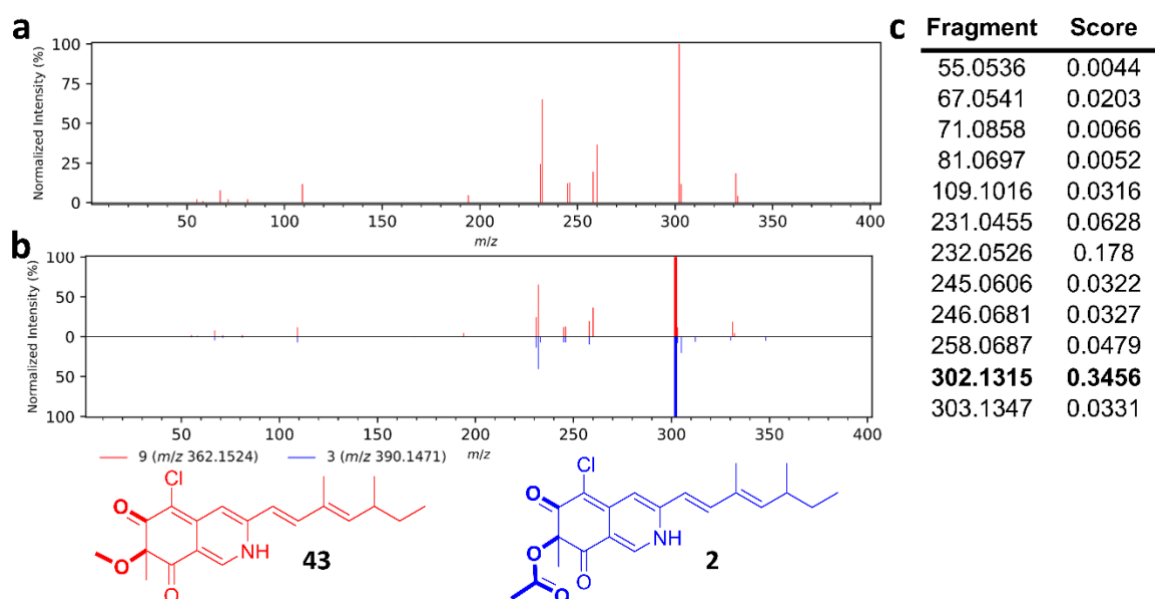

Annotation explanation: the presence of Fragment C ( $m/z$  303.1145), compound **43** exact mass and its presence in cluster B2 explained its annotation.

Figure S47: MS/MS information of compound **44** ( $m/z$  432.1945,  $-2.1$  ppm,  $t_R = 13.65$  min, level 3) from molecular network.

(a) MS/MS spectrum of compound **44**, (b) the mirror plot of MS/MS spectra from compound **44** against compound **29** with neutral losses from acylation loss (bold) and (c) the common fragments and neutral losses with their contribution to cosine score.

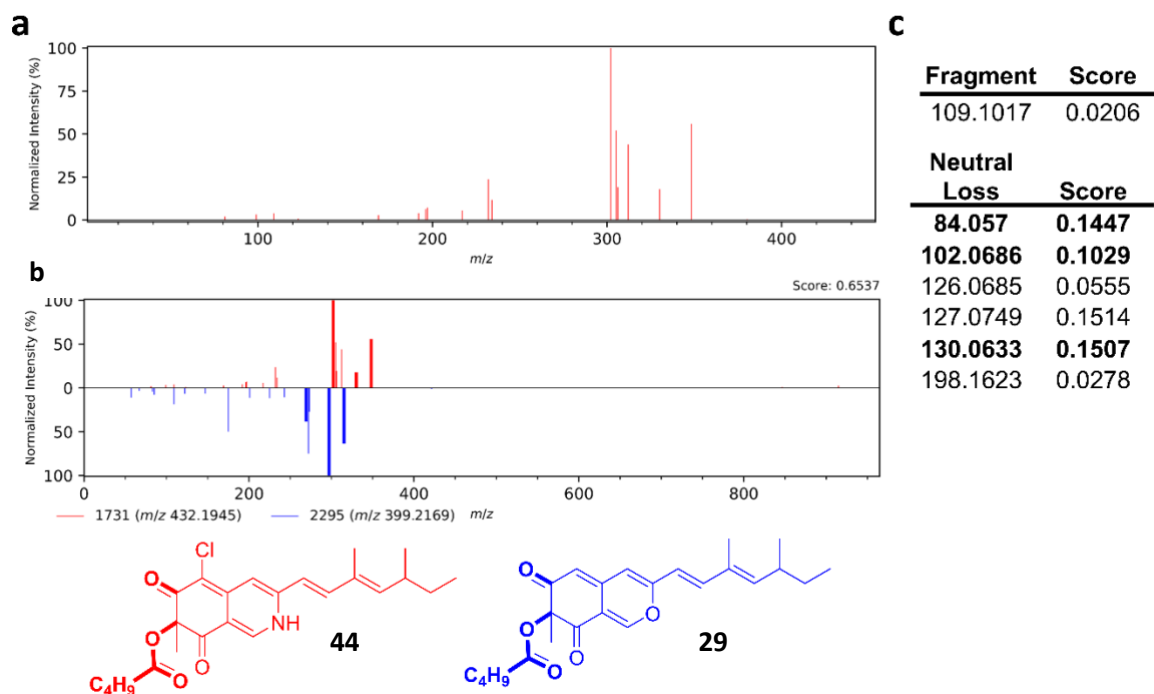

Figure S48: MS/MS information of compound **45** ( $m/z$  418.1784,  $-1.1$  ppm,  $t_R = 12.94$  min, level 3) from molecular network. (a) MS/MS spectrum **45**, (b) the mirror plot of MS/MS spectra from compound **45** with compound **26** with fragment from acylation loss (bold) and (c) the common fragments with their contribution to cosine score.

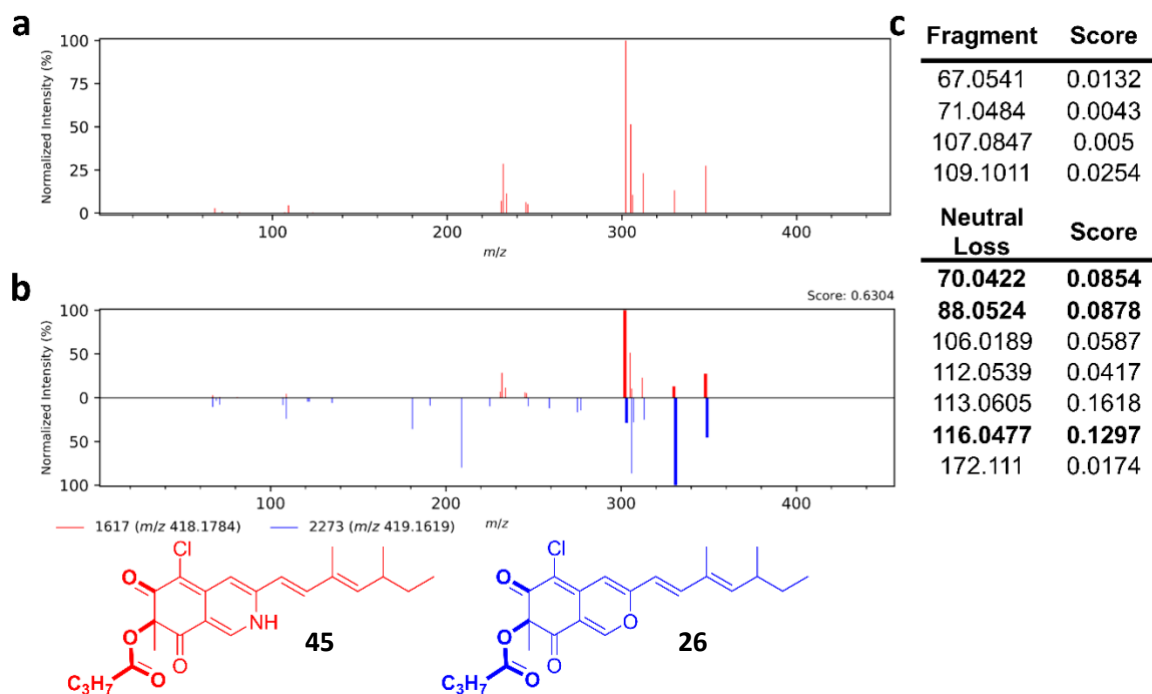

Figure S49: MS/MS information of compound **46** ( $m/z$  406.1425,  $-2.3$  ppm, level 3) from molecular network. (a) MS/MS spectrum of compound **46**, (b) the mirror plot of MS/MS spectra from compound **45** against compound **2** with neutral losses from acylation loss (bold) (c) the common fragments and neutral losses with their contribution to cosine score.

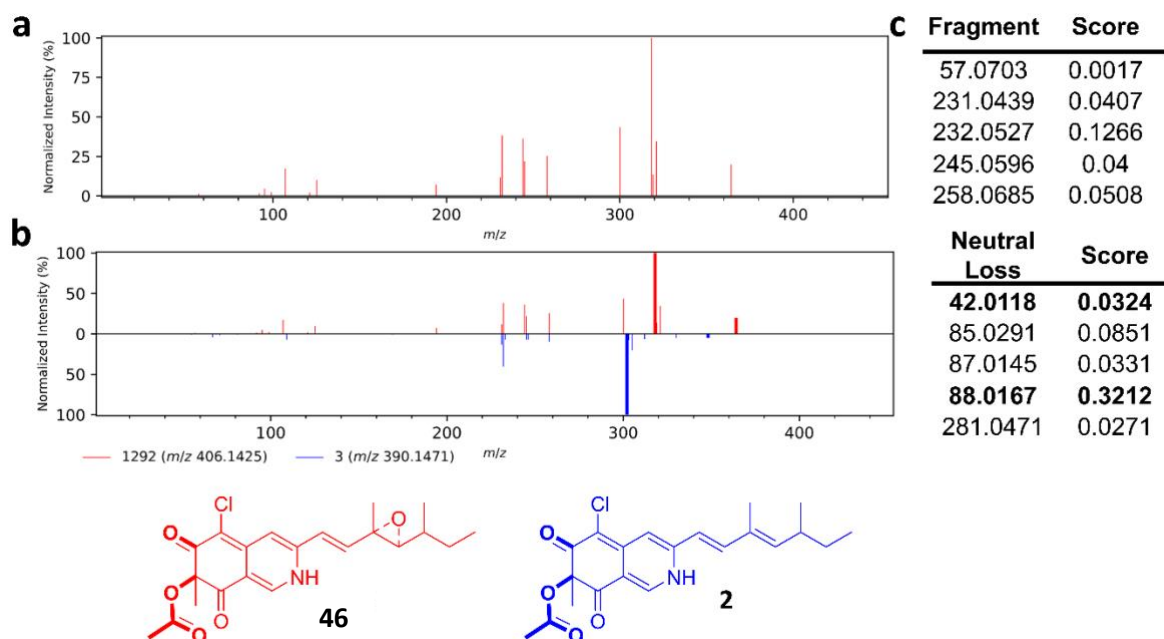

Annotation explanation: the presence of acetylation typical neutral losses within compound **46** fragmentation spectra indicates that the epoxyde is elsewhere on the molecules. Position on the 3,5-dimethyl-1,3-heptadienyl unit was favoured.



Figure S50: MS/MS information of compound **47** ( $m/z$  448.1890,  $-1.1$  ppm, level 2) from molecular network. (a) MS/MS spectrum of compound **47**, (b) the mirror plot of MS/MS spectra from compound **47** against compound **42** with neutral losses from acylation loss (bold) (c) the common fragments and neutral losses with their contribution to cosine score.

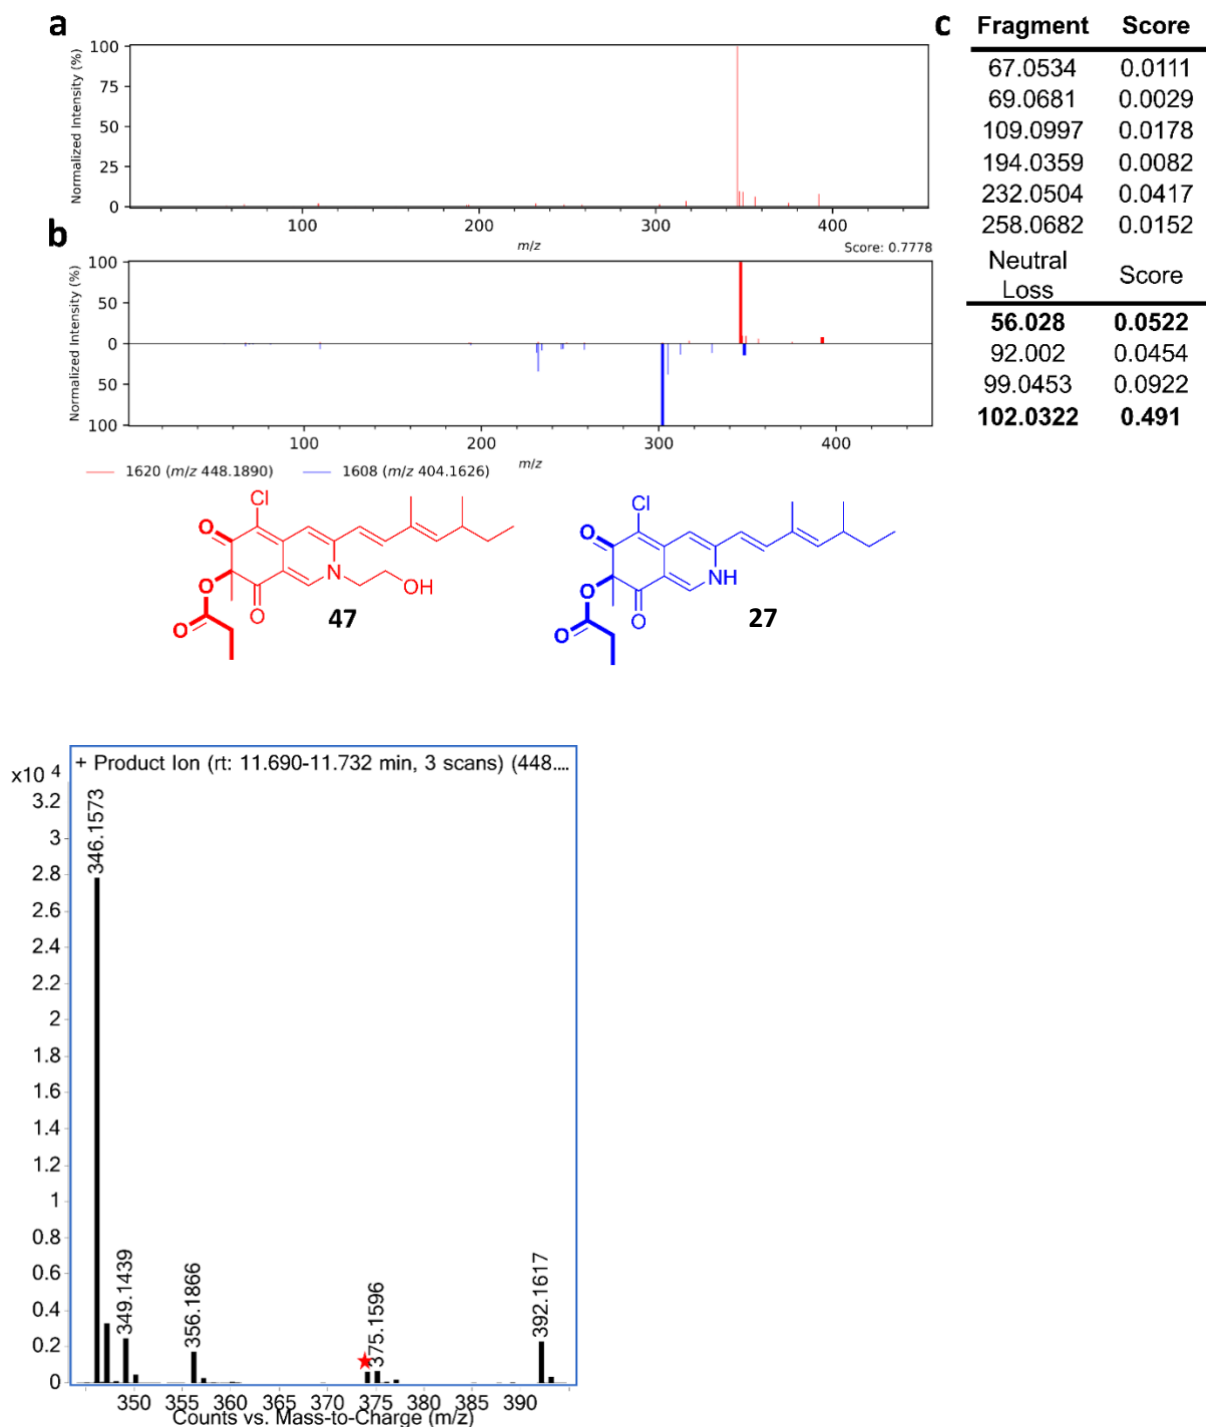

Fragmentation spectrum raw data of compound **47** to detect fragment B (red star) at  $m/z$  374.1497

Figure S51: MS/MS information of compound **48** ( $m/z$  462.2061,  $-4.2$  ppm, level 2) from molecular network. (a) MS/MS spectrum **48**, (b) the mirror plot of MS/MS spectra from compound **48** against compound **26** with neutral losses from acylation loss (bold) (c) the common fragments and neutral losses with their contribution to cosine score.

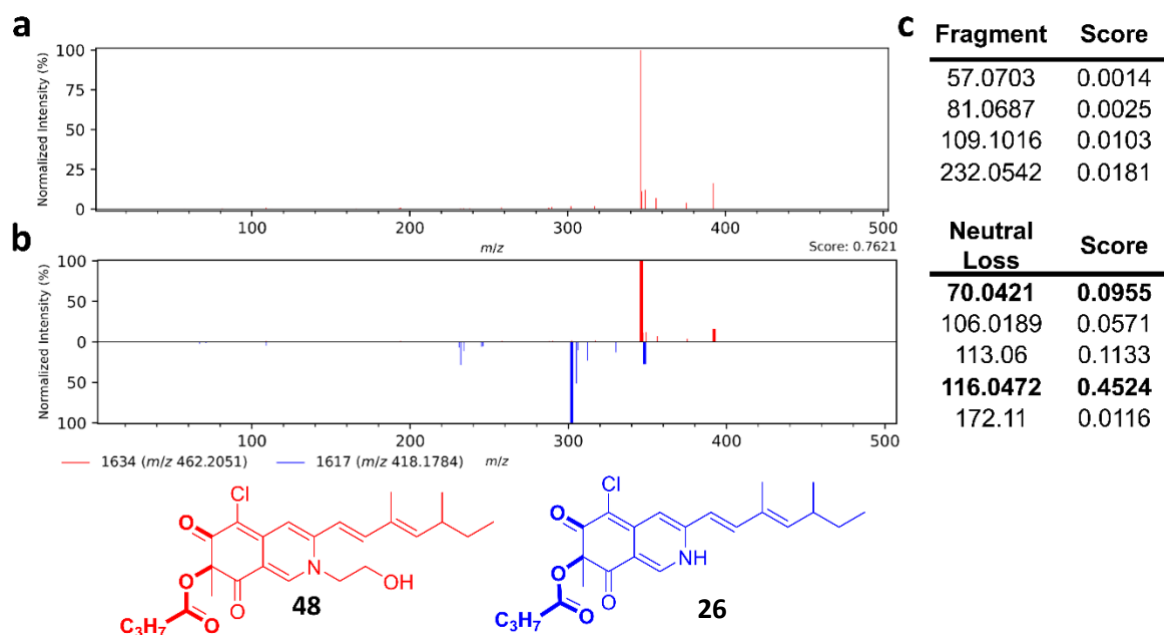

Annotation explanation: The neutral losses from butanoylation were found within its MS/MS spectra, explaining compound **48** annotation.

Figure S52: MS/MS information of compound **49** ( $m/z$  478.2001,  $-2.1$  ppm, level 3) from molecular network. (a) MS/MS spectrum of compound **49**, (b) the mirror plot of MS/MS spectra from compound **49** against compound **5** with fragment from acylation loss (bold) (c) the common fragments with their contribution to cosine score.

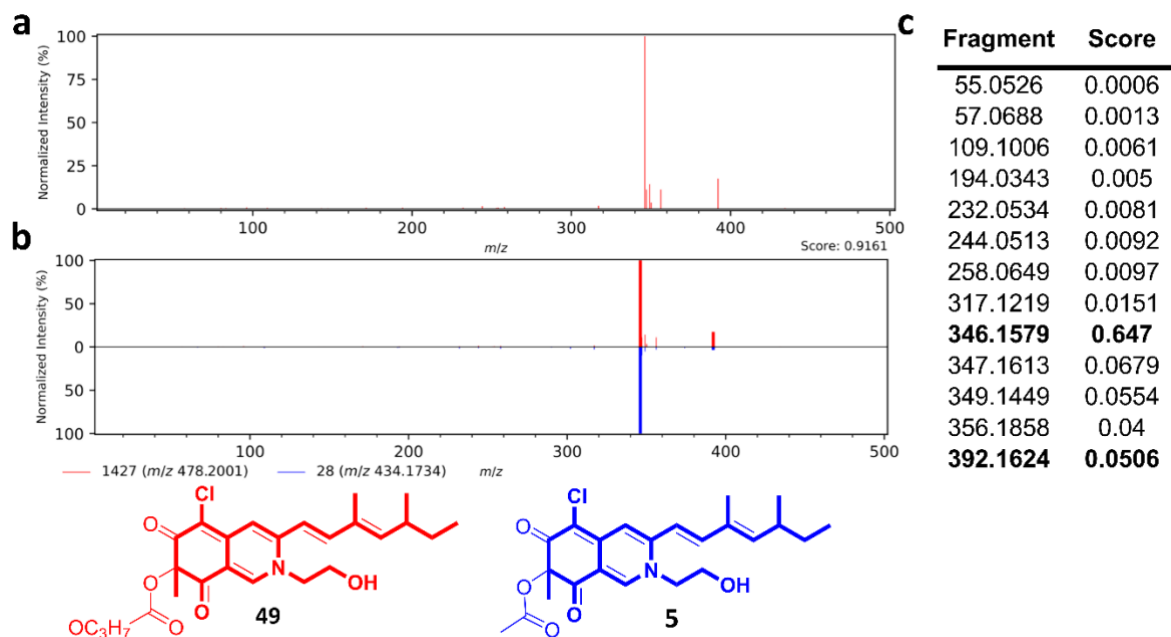

Annotation explanation: The Fragment A and C  $m/z$  are the same as compound **5** indicating a difference of acylation length .

Figure S53: MS/MS information of compound **50** ( $m/z$  448.1527,  $-1.3$  ppm, level 2) from molecular network. (a) MS/MS spectrum of compound **50**, (b) the mirror plot of MS/MS spectra from compound **53** against compound **5** with neutral losses from acylation loss (bold) (c) the common fragments and neutral losses with their contribution to cosine score.

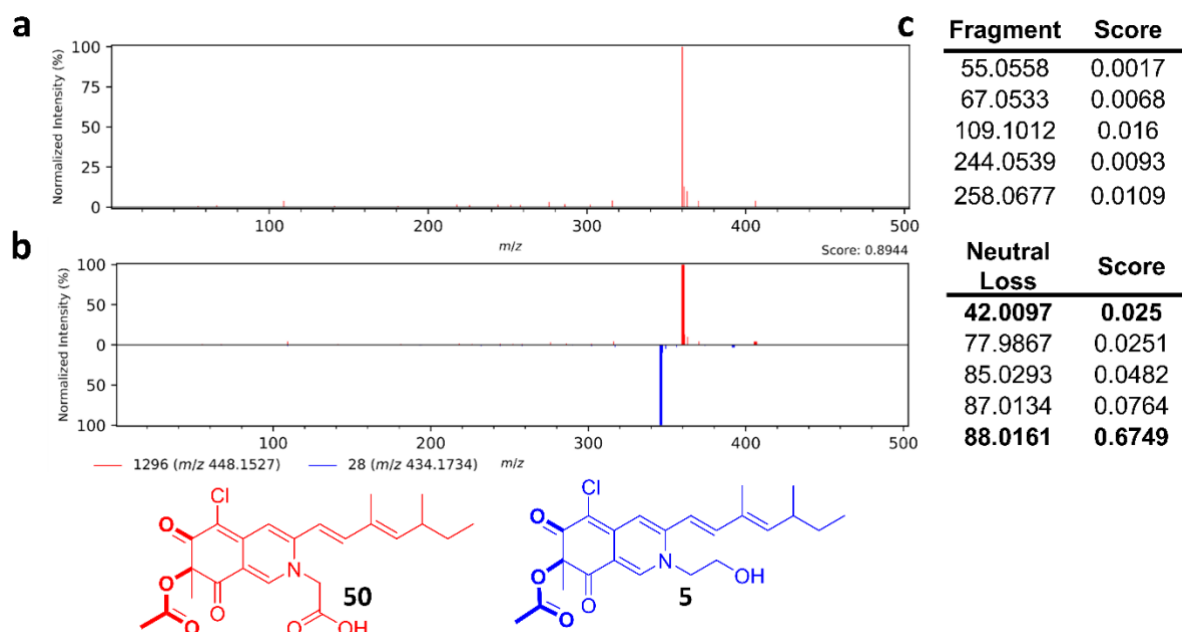

Annotation explanation: The the N-chain was 28.0318 ( $C_2H_4$ ) shorter than compound **6**. Carboxylic acid motive was favoured because several azaphilones with similar function on their carbon chain are aslo described. [2, 3]

Figure S54: MS/MS information of compound **51** ( $m/z$  462.1680,  $-0.5$  ppm, level 2) from molecular network. (a) MS/MS spectrum of compound **51**, (b) the mirror plot of MS/MS spectra from compound **51** against **19** with neutral losses from acylation loss (bold) (c) the common fragments and neutral losses with their contribution to cosine score.

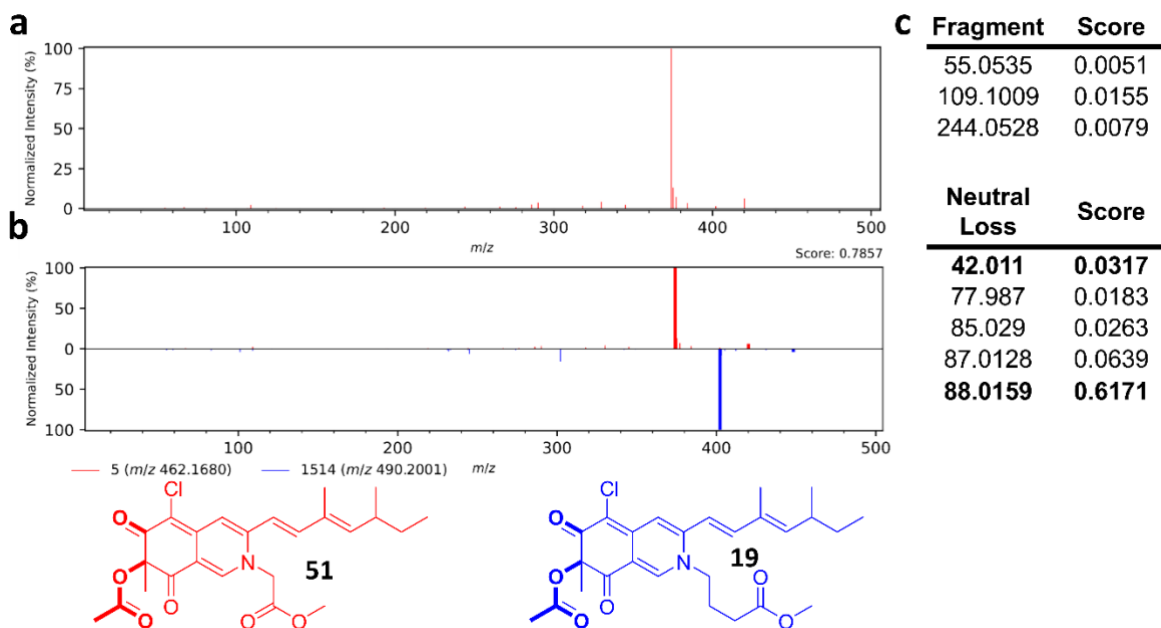

Annotation explanation: Possesses the same  $m/z$  as **61** but did not clusterize on the same area of cluster B2. Both molecules can be discriminated using characteristic fragment from linear acid chain such as one found for **6** or **20**. **51** was proposed with a methylation at the end of the chain as no characteristic fragment was found, in a similar fashion as **19**. On the other hand, **61** MS/MS spectrum displays an intense fragment of  $73.0287$   $m/z$ , corresponding to its chain.

Figure S55: MS/MS information of compound **52** ( $m/z$  460.1523,  $-0.4$  ppm, level 2) from molecular network. (a) MS/MS spectrum of compound **53**, (b) the mirror plot of MS/MS spectra from compound **52** against **5** with neutral losses from acylation loss (bold) (c) the common fragments and neutral losses with their contribution to cosine score.

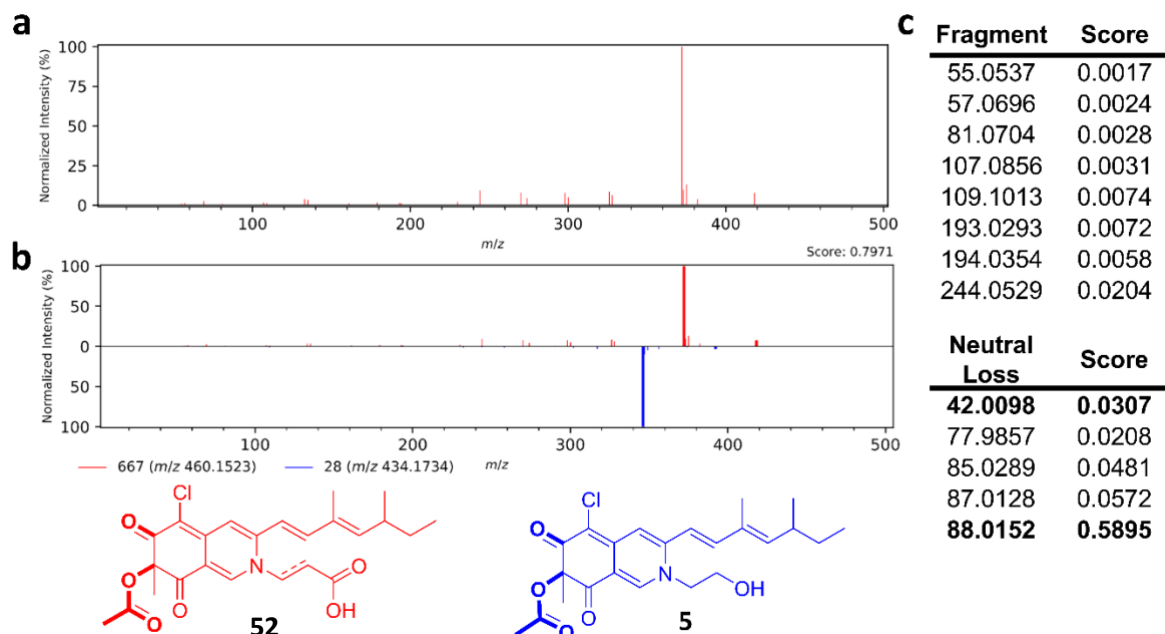

Annotation explanation: Its mass difference from **51** or **61** is 2.0172 ( $H_2$ ). This unsaturation could only be within N-chain as MS/MS spectra display typical acetylation loss.

Figure S56: MS/MS information of compound **53** ( $m/z$  400.2125,  $-1.6$  ppm, level 2) from molecular network. (a) MS/MS spectrum of compound **54**, (b) the mirror plot of MS/MS spectra from compound **53** against **5** with neutral losses from acylation loss (bold) (c) the common fragments and neutral losses with their contribution to cosine score.

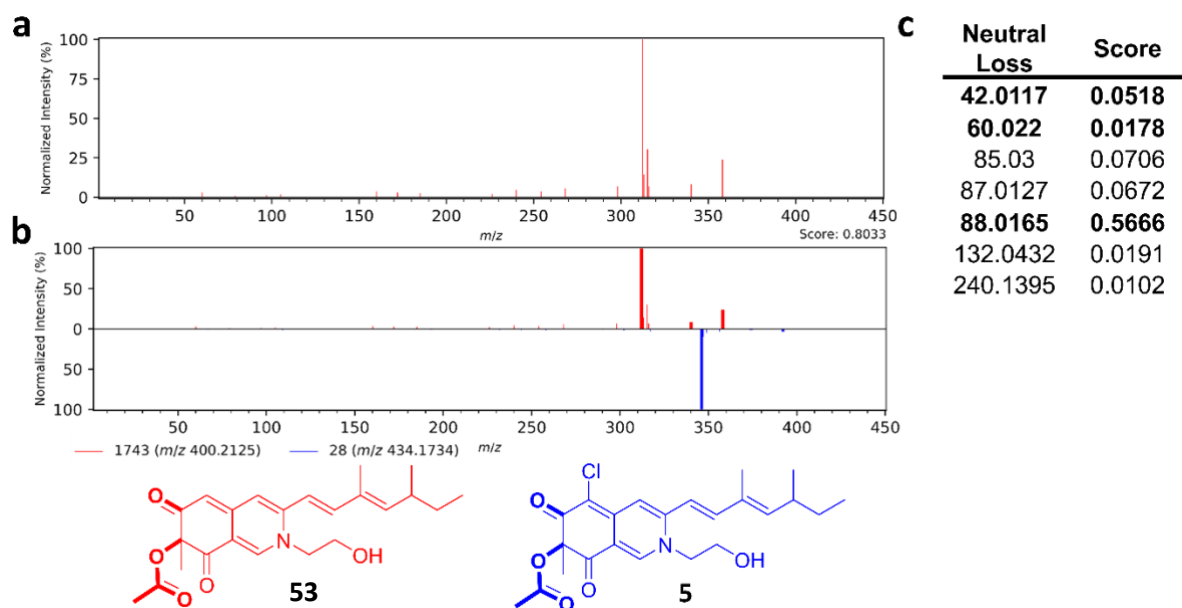

Figure S57: MS/MS information of compound **54** ( $m/z$  478.1635,  $-1.7$  ppm, level 3) from molecular network. (a) MS/MS spectrum of compound **54**, (b) the mirror plot of MS/MS spectra from compound **54** against **5** with neutral losses from acylation loss (bold) (c) the common fragments and neutral losses with their contribution to cosine score.

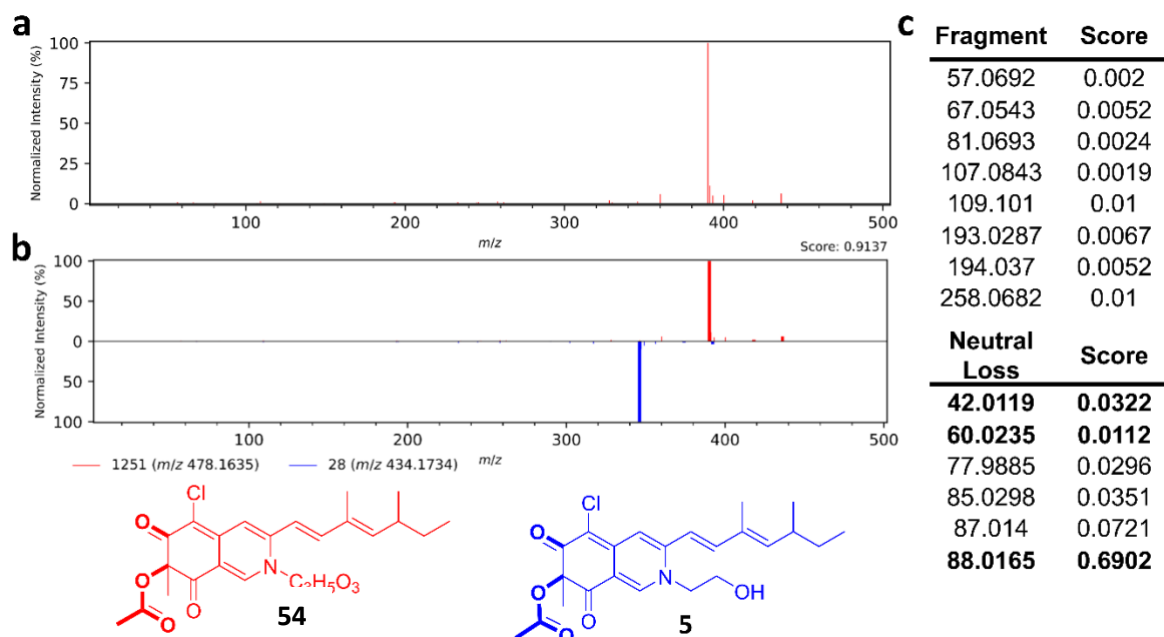

Annotation explanation: Its calculated molecular formula was  $C_{24}H_{28}ClNO_7$ , because the molecule is acetylated, the moiety attached to the nitrogen has the deducted formula  $C_3H_5O_3$ .



Figure S58: MS/MS information of compound **55** ( $m/z$  506.1576, 0.0 ppm, level 3) from molecular network. (a) MS/MS spectrum of compound **55**, (b) the mirror plot of MS/MS spectra from compound **55** against **5** with neutral losses from acylation loss (bold) (c) the common fragments and neutral losses with their contribution to cosine score.

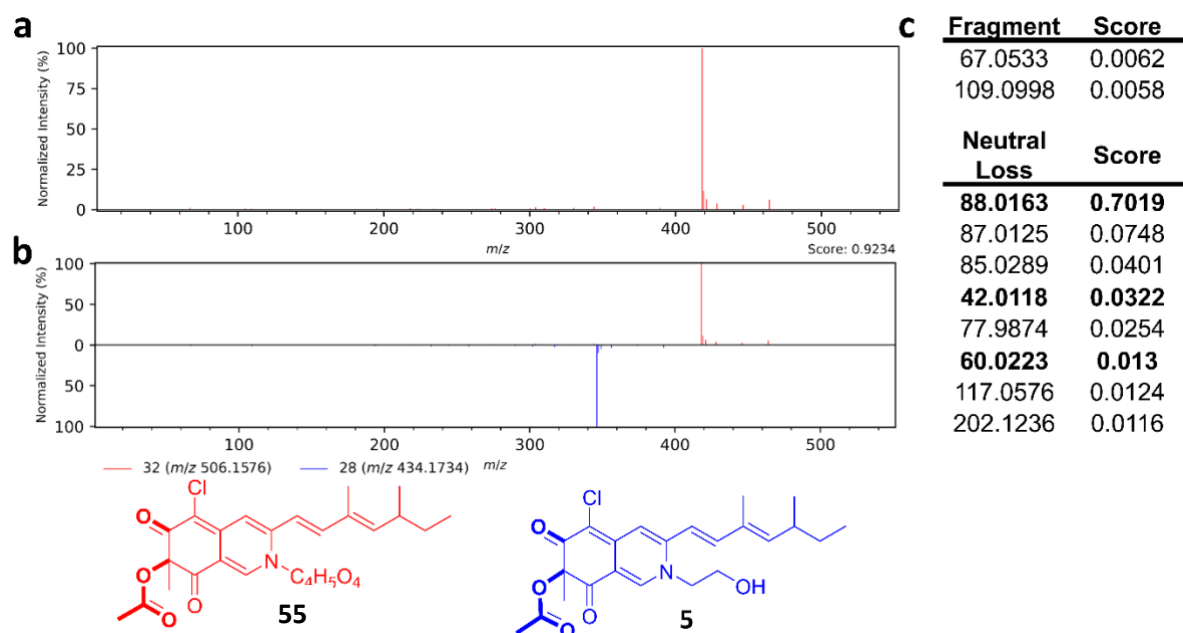

Annotation explanation: Its calculated molecular formula was  $C_{25}H_{28}ClNO_8$ , because the molecule is acetylated, the moiety attached to the nitrogen has the deducted formula  $C_4H_5O_4$

Figure S59: MS/MS information of compound **56** ( $m/z$  520.1742,  $-1.8$  ppm, level 3) from molecular network. (a) MS/MS spectrum of compound **56**, (b) the mirror plot of MS/MS spectra from compound **56** against **5** with neutral losses from acylation loss (bold) (c) the common fragments and neutral losses with their contribution to cosine score.

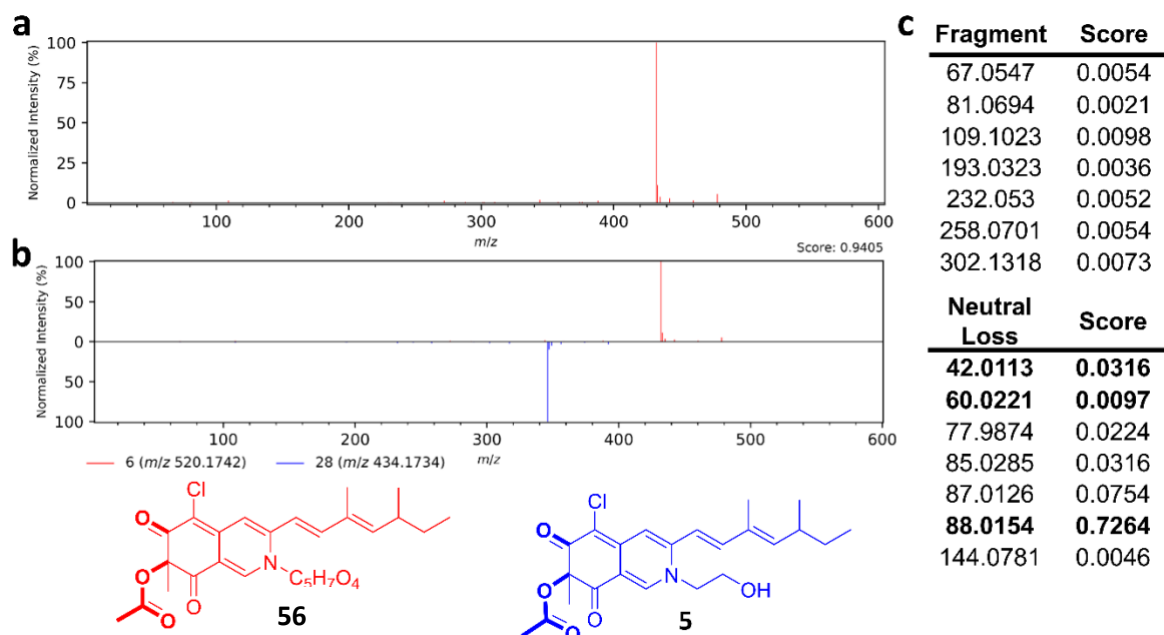

Annotation explanation: Its calculated molecular formula was  $C_{26}H_{30}ClNO_8$ , because the molecule is acetylated, the moiety attached to the nitrogen has the deducted formula  $C_5H_7O_4$ .

Figure S60: MS/MS information of compound **57** ( $m/z$  505.1750,  $-2.8$  ppm, level 3) from molecular network. (a) MS/MS spectrum of compound **57**, (b) the mirror plot of MS/MS spectra from compound **57** against **54** with neutral losses from acylation loss (bold) (c) the common fragments and neutral losses with their contribution to cosine score.

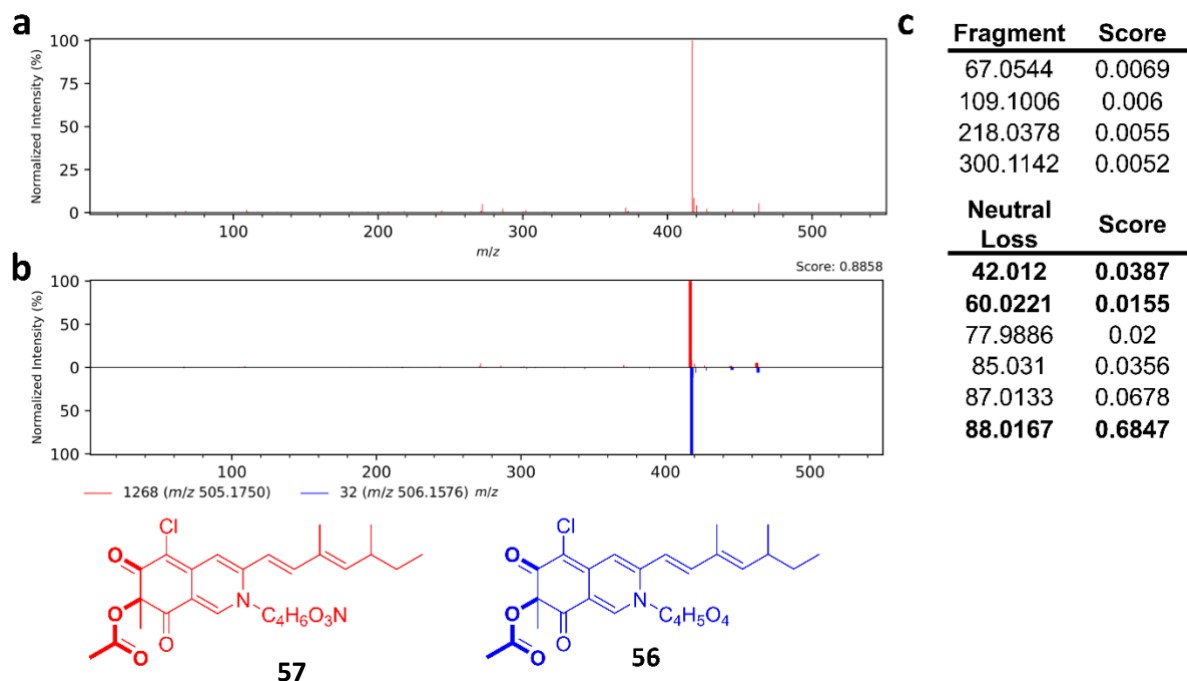

Annotation explanation: Its calculated molecular formula was  $C_{25}H_{29}ClN_2O_7$ , because the molecule is acetylated, the moiety attached to the nitrogen has the deducted formula  $C_4H_6O_3N$ .

Figure S61: MS/MS information of compound **58** ( $m/z$  519.1899,  $-1.2$  ppm, level 3) from molecular network. (a) MS/MS spectrum of compound **58**, (b) the mirror plot of MS/MS spectra from compound **58** against **56** with neutral losses from acylation loss (bold) (c) the common fragments and neutral losses with their contribution to cosine score.

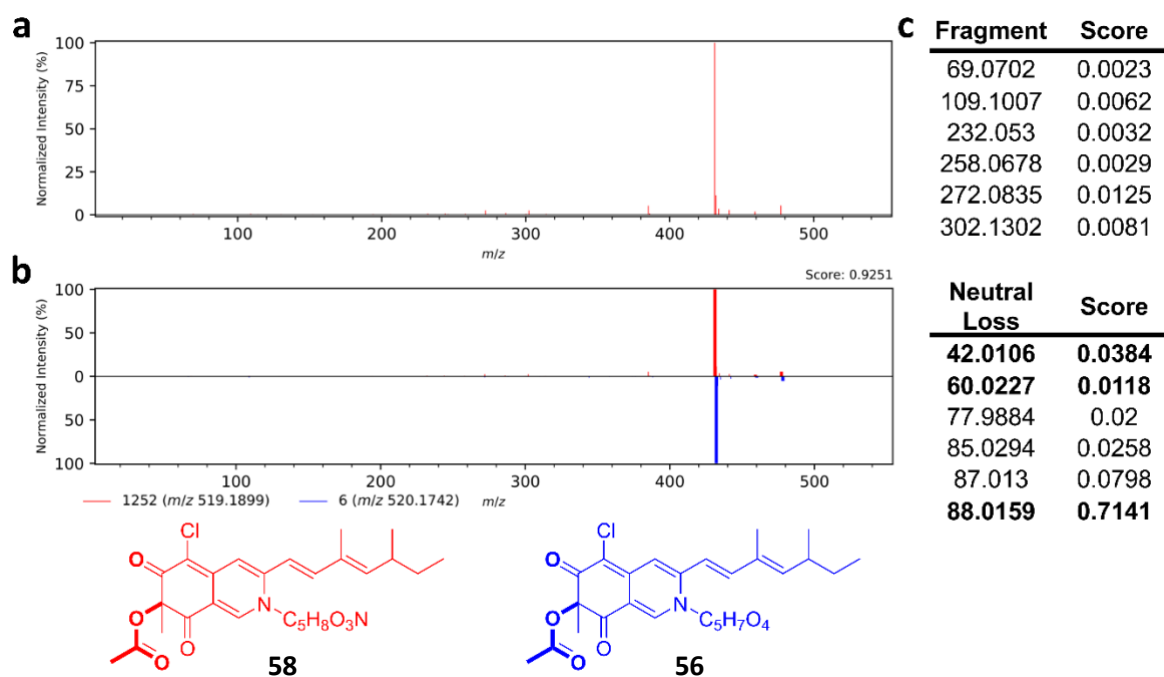

Annotation explanation: Its calculated molecular formula was  $C_{26}H_{31}ClN_2O_7$ , because the molecule is acetylated, the moiety attached to the nitrogen has the deducted formula  $C_5H_8O_3N$ .

Figure S62: MS/MS information of compound **59** ( $m/z$  547.2219,  $-2.5$  ppm, level 3) from molecular network. (a) MS/MS spectrum of compound **59**, (b) the mirror plot of MS/MS spectra from compound **59** against **58** with neutral losses from acylation loss from cluster B1 scaffold (bold) (c) the common fragments and neutral losses with their contribution to cosine score.

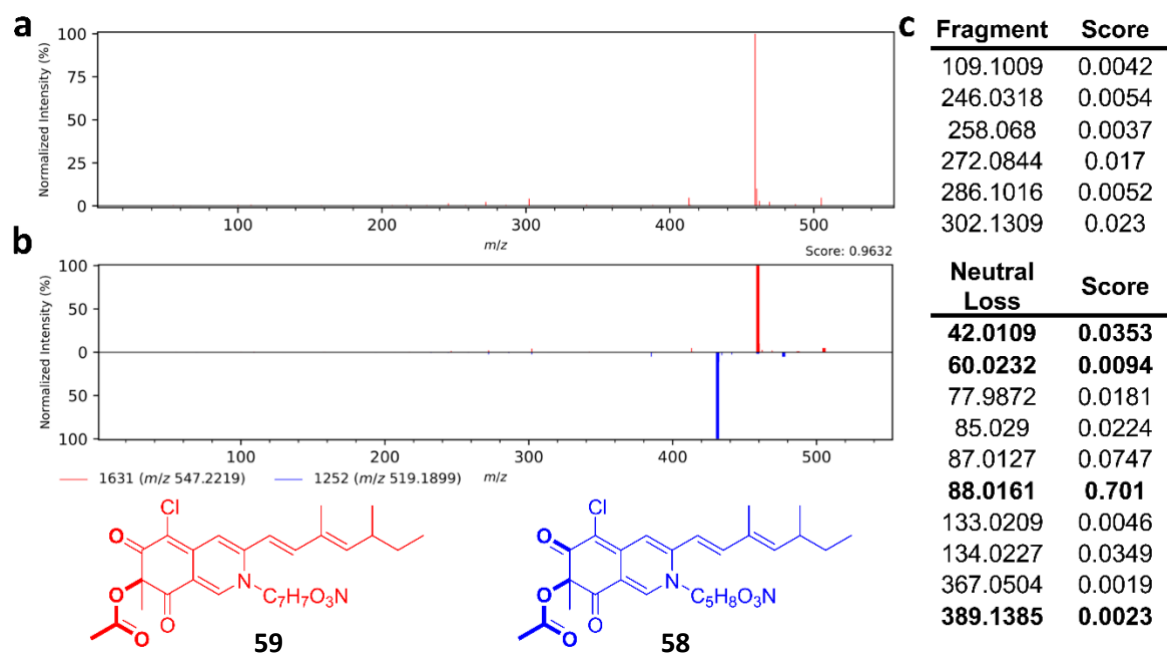

Annotation explanation: Its calculated molecular formula was  $C_{28}H_{35}ClN_2O_7$ , because the molecule is acetylated, the moiety attached to the nitrogen has the deducted formula  $C_5H_7O_4$ .

Figure S63: MS/MS information of compound **60** ( $m/z$  561.2373,  $-2.0$  ppm, level 3) from molecular network. (a) MS/MS spectrum of compound **60**, (b) the mirror plot of MS/MS spectra from compound **60** against **5** with neutral losses from acylation loss scaffold (bold) (c) the common fragments and neutral losses with their contribution to cosine score.

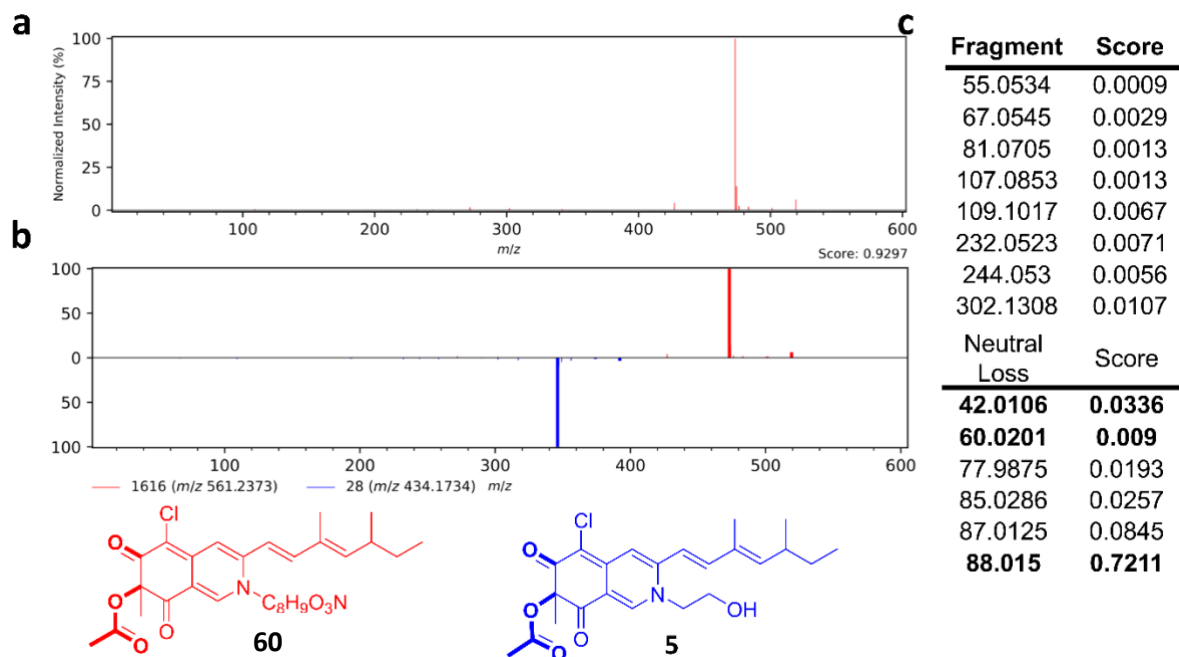

Annotation explanation: Its calculated molecular formula was  $C_{29}H_{37}ClN_2O_7$ , because the molecule is acetylated, the moiety attached to the nitrogen has the deducted formula  $C_8H_9O_3N$ .

Figure S64: MS/MS information of compound **61** ( $m/z$  462.1695,  $-3.7$  ppm, level 2) from molecular network. (a) MS/MS spectrum of compound **61**, (b) the mirror plot of MS/MS spectra from compound **61** against **6** with neutral losses from acylation and nitrogen chain loss (bold) (c) the common fragments and neutral losses with their contribution to cosine score.

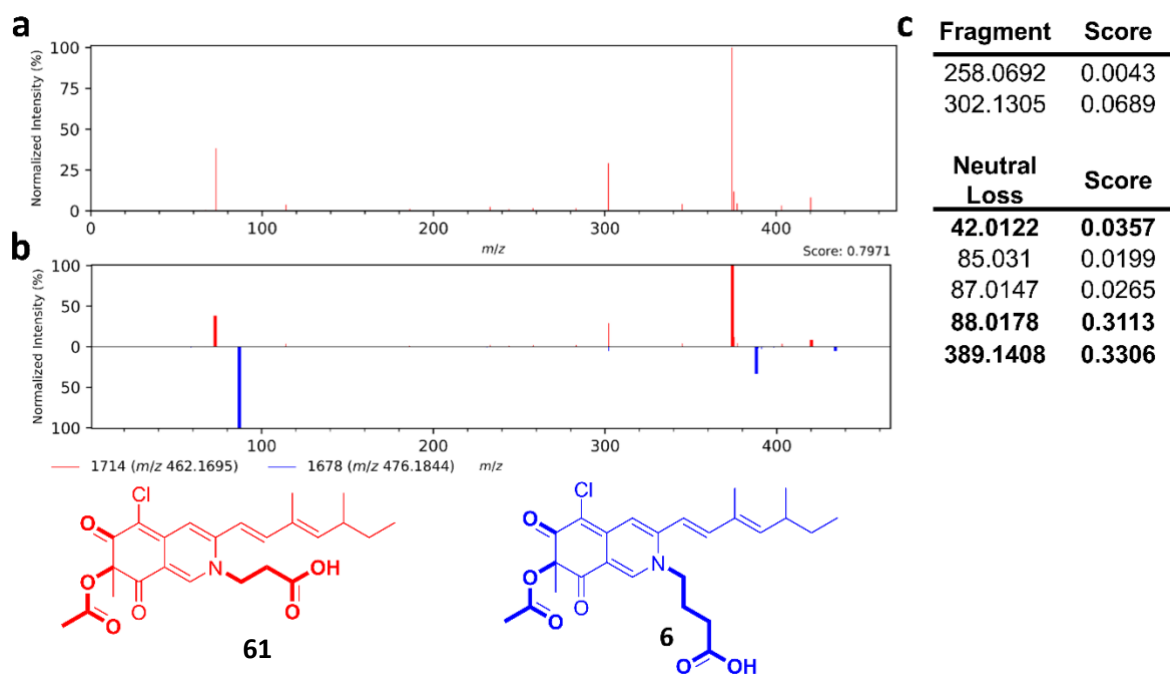

Figure S65: MS/MS information of compound **62** ( $m/z$  500.1841,  $-1.3$  ppm, level 3) from molecular network. (a) MS/MS spectrum of compound **62**, (b) the mirror plot of MS/MS spectra from compound **62** against **6** with neutral losses from acylation loss scaffold (bold) (c) the common fragments and neutral losses with their contribution to cosine score.

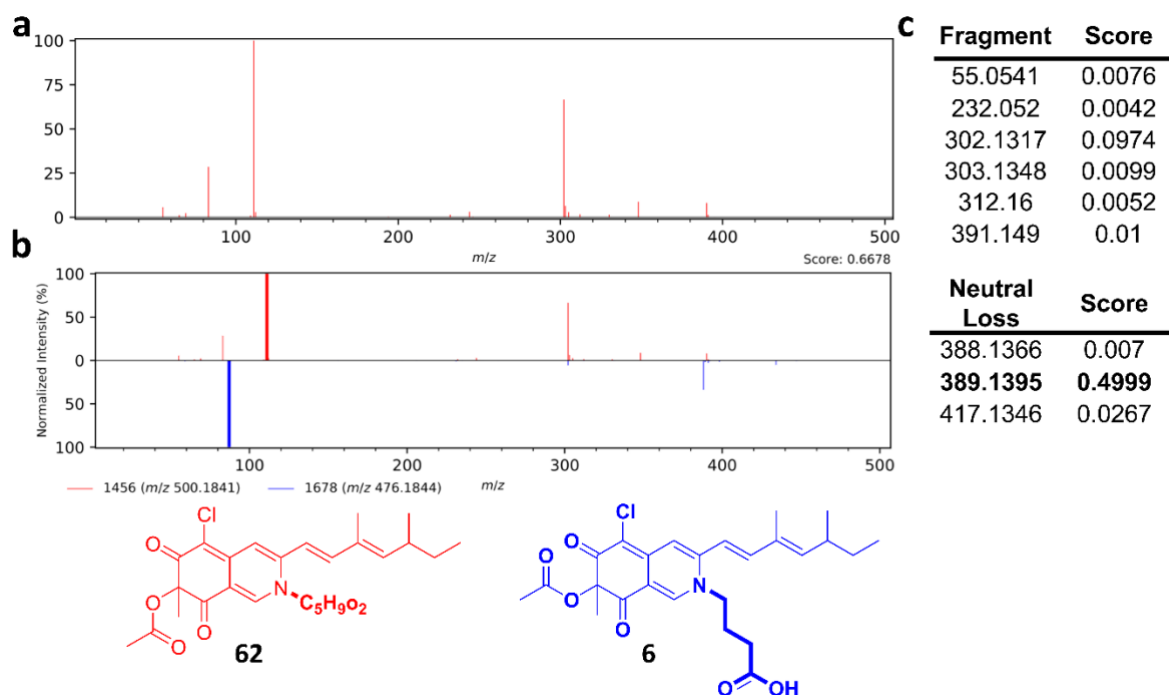

Annotation explanation: Its calculated molecular formula was  $C_{27}H_{30}ClNO_6$ , because the molecule is acetylated, the moiety attached to the nitrogen has the deducted formula  $C_6H_7O_2$ .



Figure S66: MS/MS information of compound **63** ( $m/z$  451.1522,  $-0.9$  ppm, level 0) from molecular network. (a) MS/MS spectrum of compound **63**, (b) the mirror plot of MS/MS spectra from compound **63** against **15** with the main contributors to cosine score (bold), and (c) the fragment list and their contribution to cosine score.

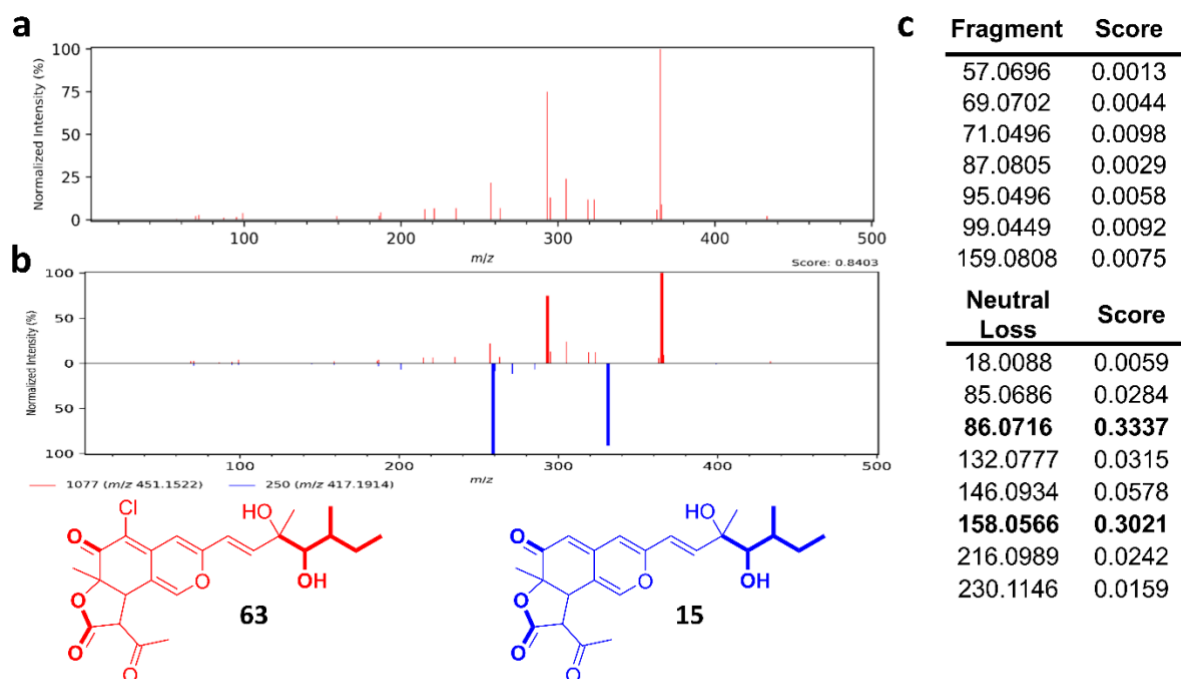

Figure S67: MS/MS information of compound **64** ( $m/z$  391.2121,  $-1.5$  ppm, level 3) from molecular network. (a) MS/MS spectrum of compound **64**, (b) the mirror plot of MS/MS spectra from compound **64** against **14** with neutral losses from CO-OH and diol carbon chain (bold) (c) the common fragments and neutral losses with their contribution to cosine score.

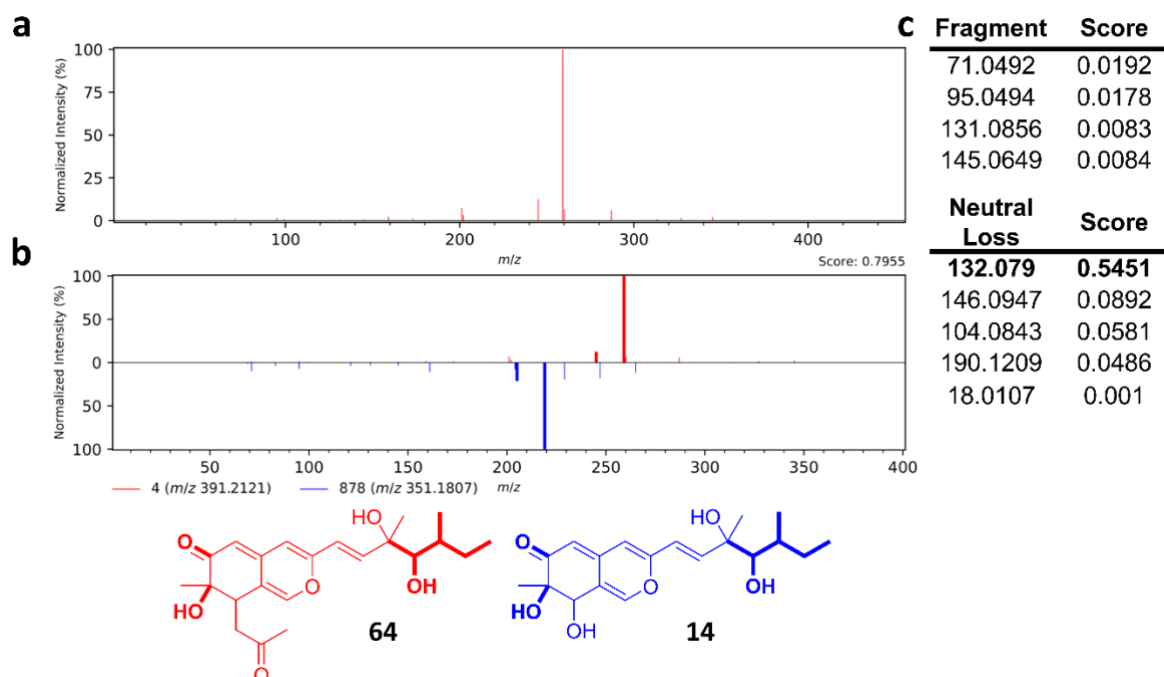

Annotation explanation: the diol chain and the position of the modification were positioned thanks to 132.079 Da neutral loss. The more plausible acetone position was favoured. This azaphilone motive is also reported within literature. [4]

Figure S68: MS/MS information of compound **65** ( $m/z$  425.1731,  $-1.3$  ppm, level 3) from molecular network. (a) MS/MS spectrum of compound **65**, (b) the mirror plot of MS/MS spectra from compound **65** against **64** with neutral losses from CO-OH and diol carbon chain (bold) (c) the common fragments and neutral losses with their contribution to cosine score.

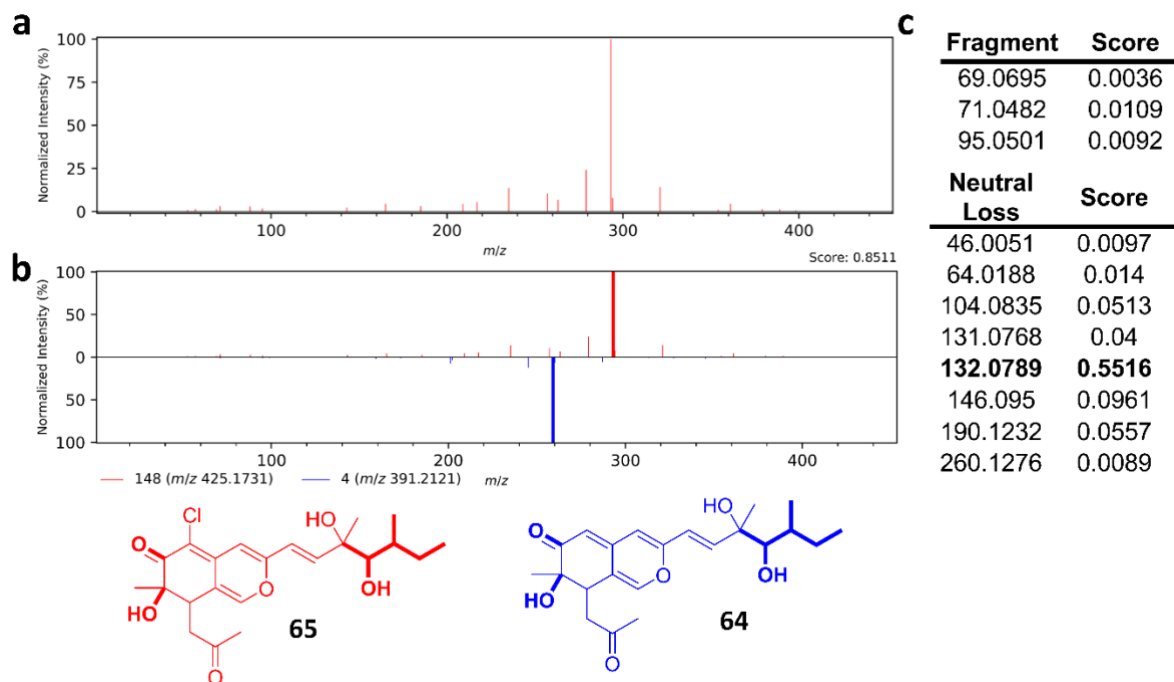

Figure S69: MS/MS information of compound **66** ( $m/z$  393.2274,  $-0.6$  ppm, level 3) from molecular network. (a) MS/MS spectrum of compound **66**, (b) the mirror plot of MS/MS spectra from compound **66** against **64** with neutral losses from CO-OH and diol carbon chain (bold) (c) the common fragments and neutral losses with their contribution to cosine score.

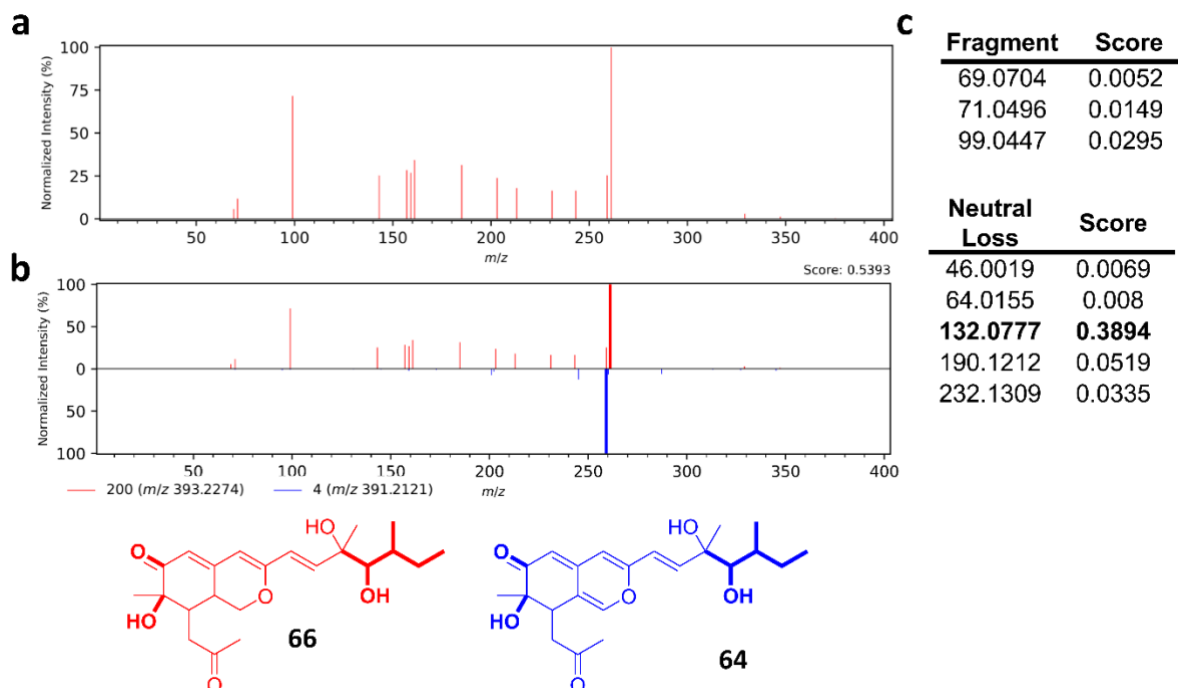

Annotation explanation: It clusterizes with **16**, **17** and **18** and its  $m/z$  difference of 2.0153 (corresponding to  $H_2$  loss) from **64**.

Figure S70: MS/MS information of compound **67** ( $m/z$  350.1964,  $-0.6$  ppm, level 2) from molecular network. (a) MS/MS spectrum of compound **67**, (b) the mirror plot of MS/MS spectra from compound **67** against **14** with neutral losses from CO-OH and diol carbon chain (bold) (c) the common fragments and neutral losses with their contribution to cosine score.

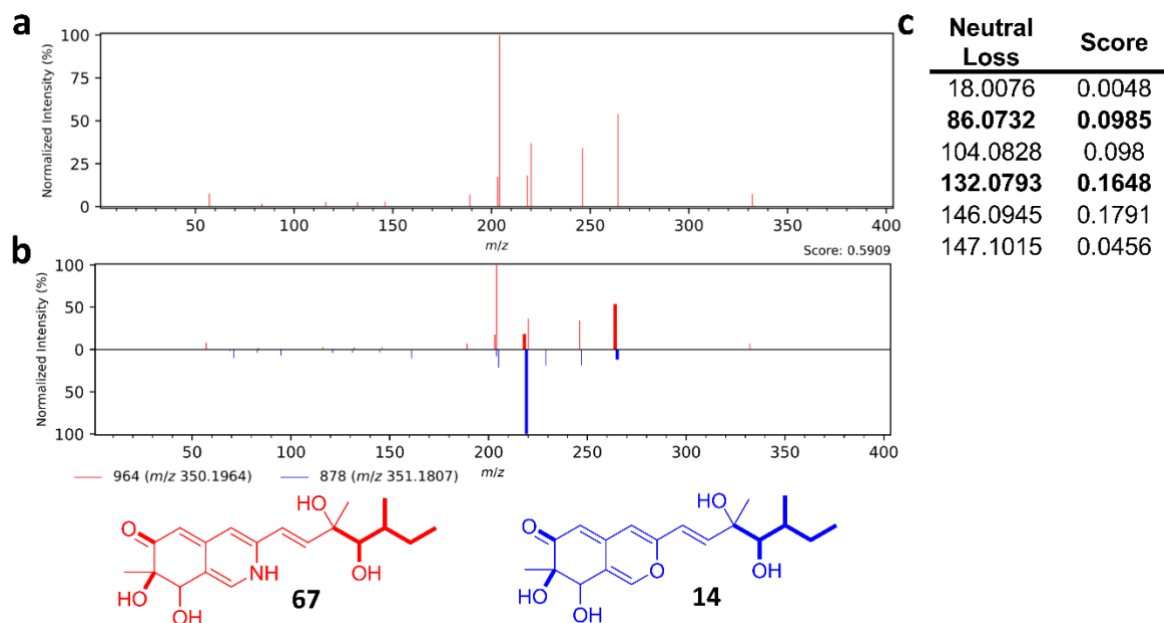

Annotation explanation: Its  $m/z$  difference with **14** was 0.9843, indicates the presence of NH instead of O atom.

Figure S71: MS/MS information of compound **68** ( $m/z$  390.2282,  $-1.8$  ppm, level 3) from molecular network. (a) MS/MS spectrum of compound **68**, (b) the mirror plot of MS/MS spectra from compound **68** against **64** with neutral losses from CO-OH and diol carbon chain (bold) (c) the common fragments and neutral losses with their contribution to cosine score.

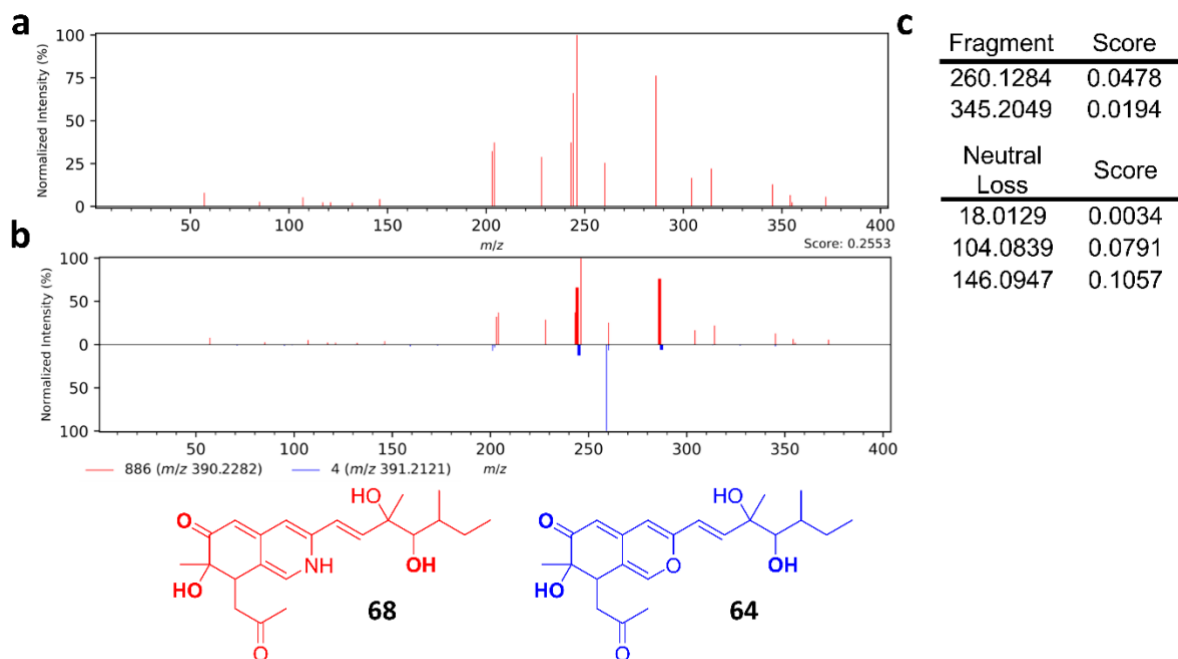

Annotation explanation: Its  $m/z$  difference with **64** was 0.9843, indicates the presence of NH instead of O atom.

Figure S72: MS/MS information of compound **69** ( $m/z$  339.1963,  $-2.5$  ppm, level 3) from molecular network.

(a) MS/MS spectrum of compound **69**, (b) the mirror plot of MS/MS spectra from compound **69** against **3** with common fragment (c) the common fragments with their contribution to cosine score.

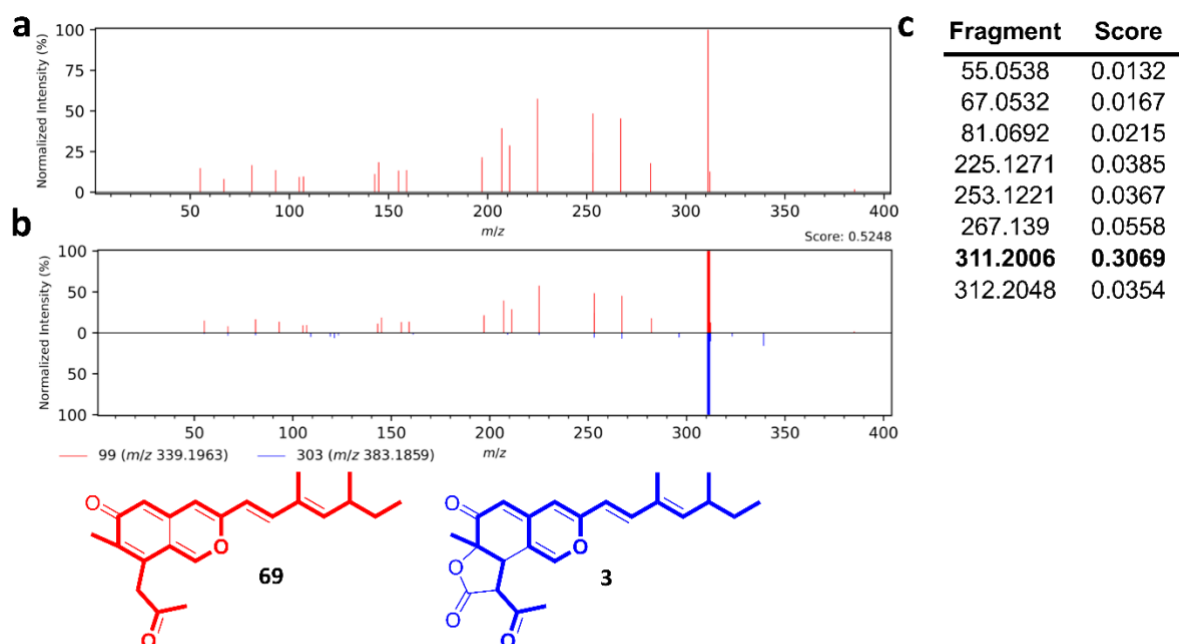

Annotation explanation: The main common fragment with **3** has  $m/z$  311.2006 and it corresponds to a CO loss from **69** aromatic ring.

Figure S73: MS/MS information of compound **70** ( $m/z$  399.1805,  $-0.7$  ppm, level 3) from molecular network. (a) MS/MS spectrum of compound **70**, (b) the mirror plot of MS/MS spectra from compound **70** against **3** with common neutral loss from lactone ring and CO (c) the common fragments with their contribution to cosine score.

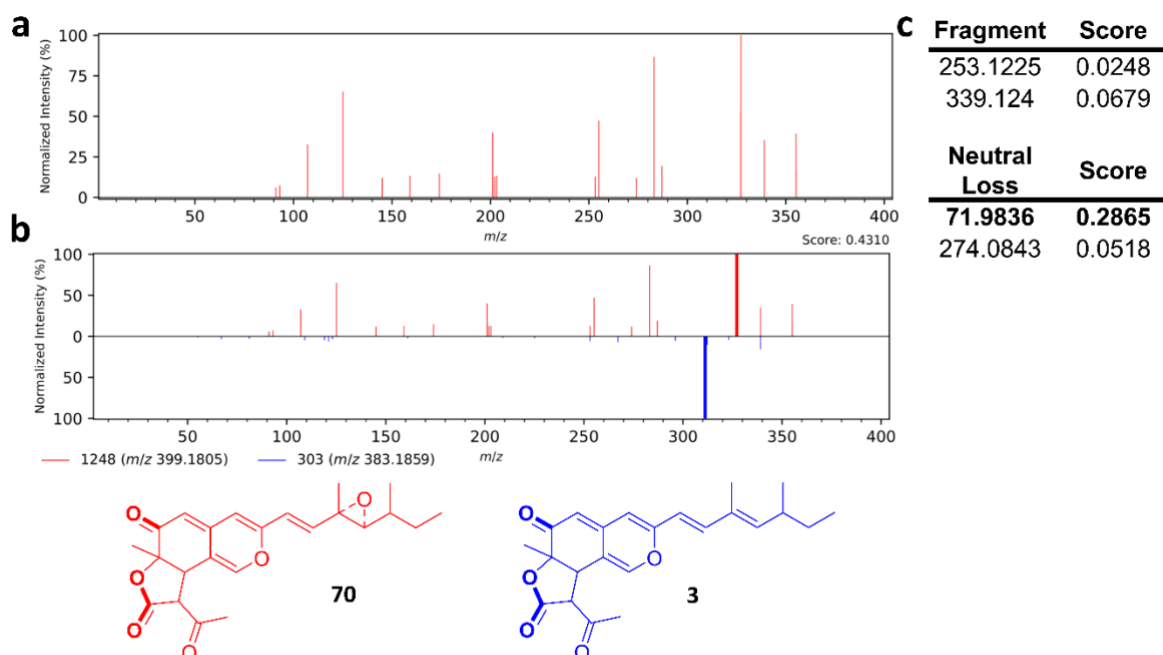

Annotation explanation: the fragmentation from lactone lactone ring followed by CO loss were common with **3**, and its  $m/z$  difference was 15.9946 (corresponding to O).



Figure S74: MS/MS information of compound **71** ( $m/z$  433.1419,  $-1.5$  ppm, level 3) from molecular network. (a) MS/MS spectrum of compound **71**, (b) the mirror plot of MS/MS spectra from compound **71** against **4** with common neutral loss from lactone ring and CO (c) the common fragments with their contribution to cosine score.

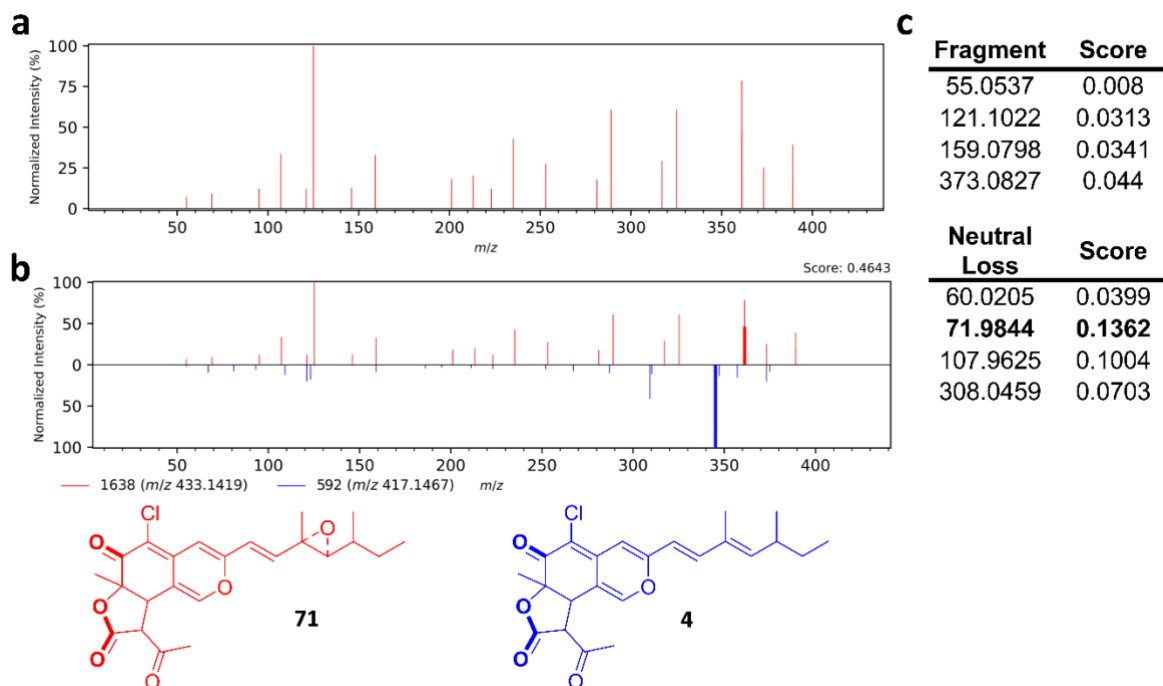

Annotation explanation: The fragmentation from lactone ring followed by CO loss were common with **4**, and its  $m/z$  difference was 15.9946 (corresponding to O).

Figure S75: MS/MS information of compound **72** ( $m/z$  381.1691, 1.5 ppm, level 2) from molecular network. (a) MS/MS spectrum of compound **72**, (b) the mirror plot of MS/MS spectra from compound **72** against **23** (c) the common fragments and neutral losses with their contribution to cosine score.

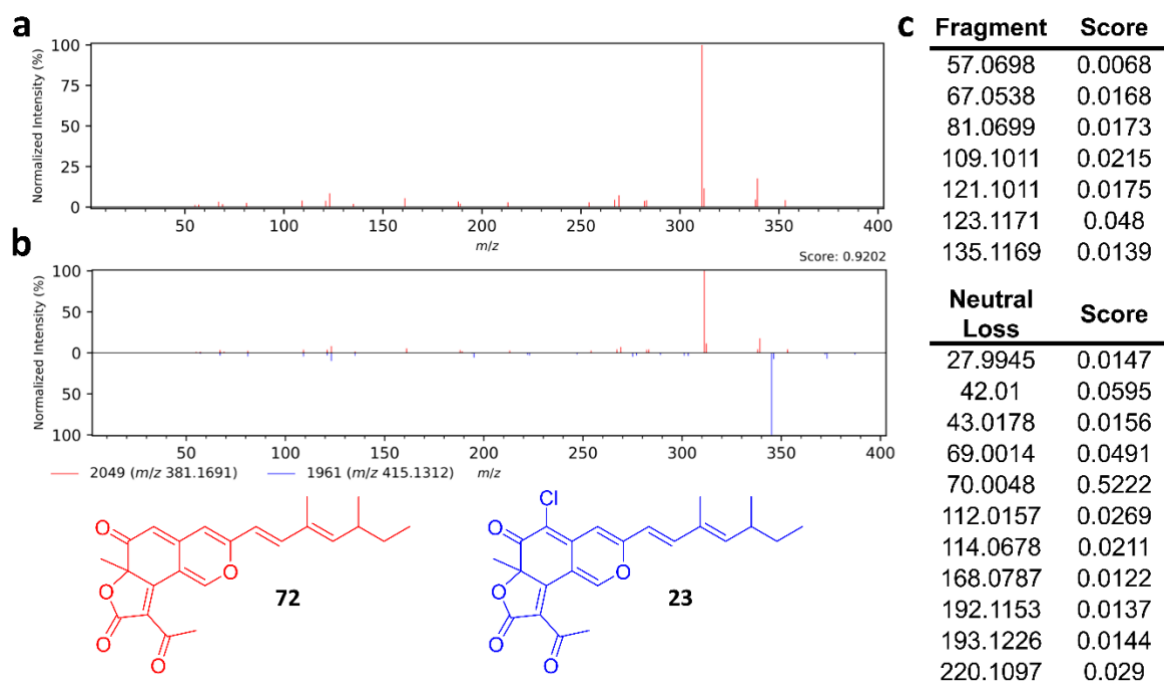

Annotation explanation: Its  $m/z$  differences with **23** of 33.9621 and the lack of typical  $^{37}\text{Cl}$  isotopic peak indicating a H atom instead of a Cl.

Figure S76: MS/MS information of compound **73** ( $m/z$  385.2017,  $-2.0$  ppm, level 2) from molecular network. (a) MS/MS spectrum of compound **73**, (b) the mirror plot of MS/MS spectra from compound **73** against **3** with common neutral loss from lactone ring and CO (c) the common fragments and neutral losses with their contribution to cosine score.

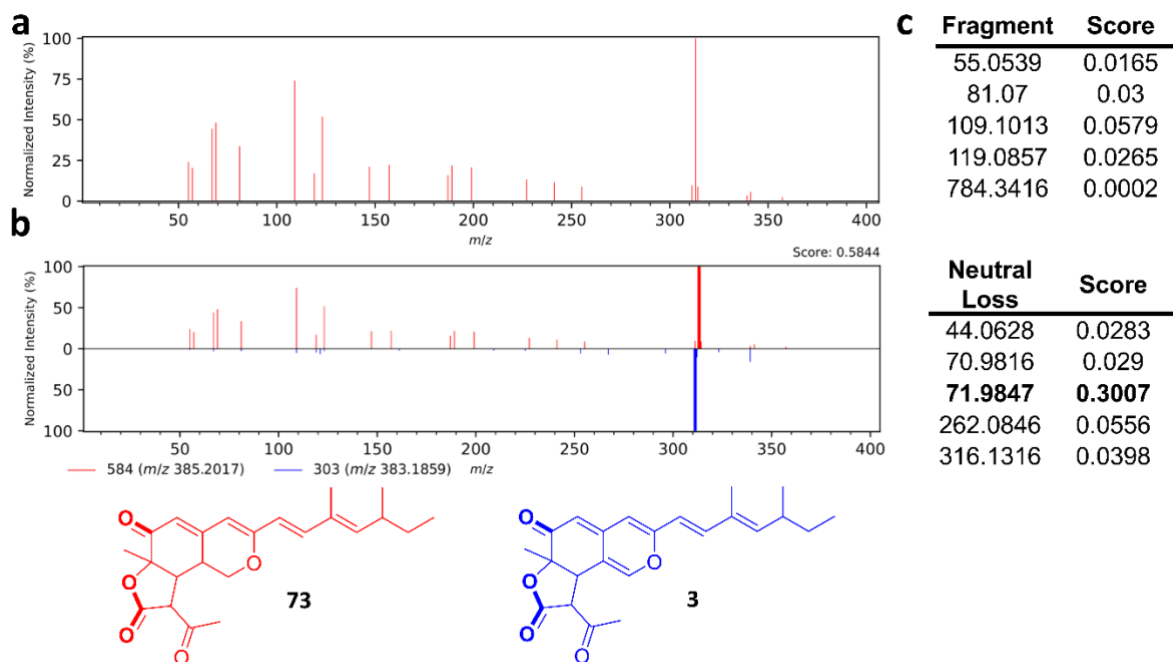

Annotation explanation: Its  $m/z$  difference of 2.0153 (corresponding to  $H_2$ ) from **3** and its lactone ring fragmentation.

Figure S77: MS/MS information of compound **74** ( $m/z$  380.1861,  $-1.2$  ppm, level 0) from molecular network. (a) MS/MS spectrum of compound **74**, (b) the mirror plot of MS/MS spectra from compound **74** against **3** with common neutral loss from lactone ring and CO (c) the common fragments and neutral losses with their contribution to cosine score.

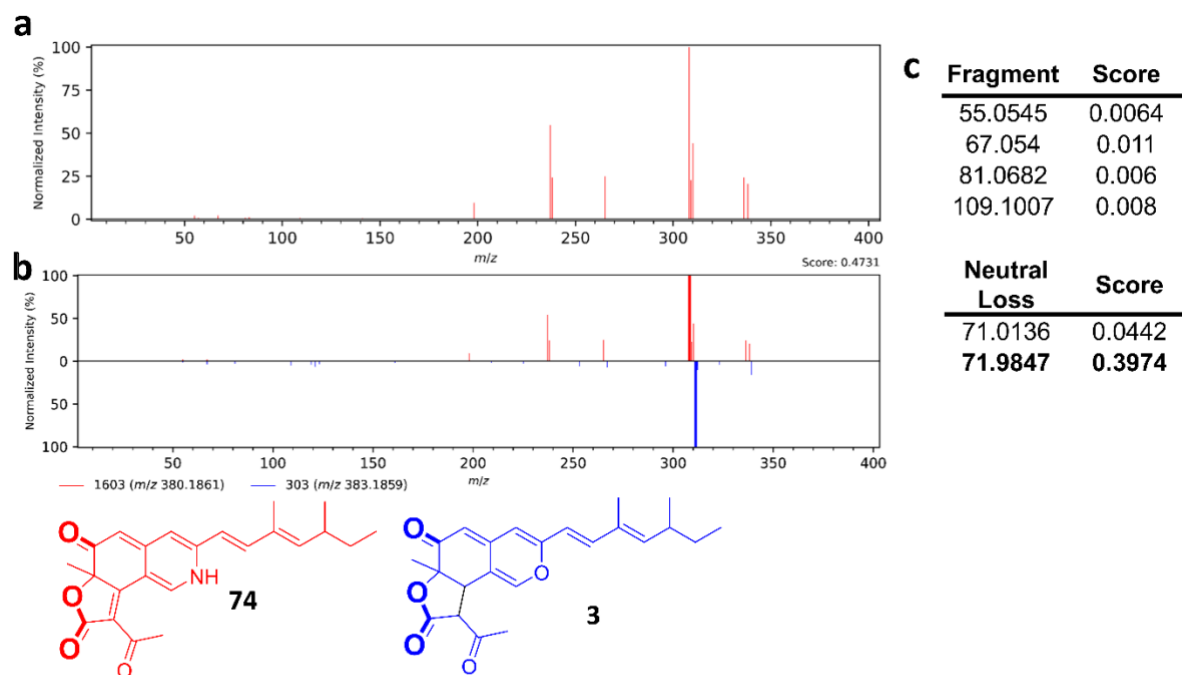

Annotation explanation: Compound **74** possesses a neutral loss from its lactone ring fragmentation. The NH conversion from O was suggested by its even  $m/z$ .

Figure S78: MS/MS information of compound **75** ( $m/z$  424.2123,  $-1.1$  ppm, level 0) from molecular network. (a) MS/MS spectrum of compound **75**, (b) the mirror plot of MS/MS spectra from compound **75** against **74** with common neutral loss from lactone ring and CO (c) the common fragments and neutral losses with their contribution to cosine score.

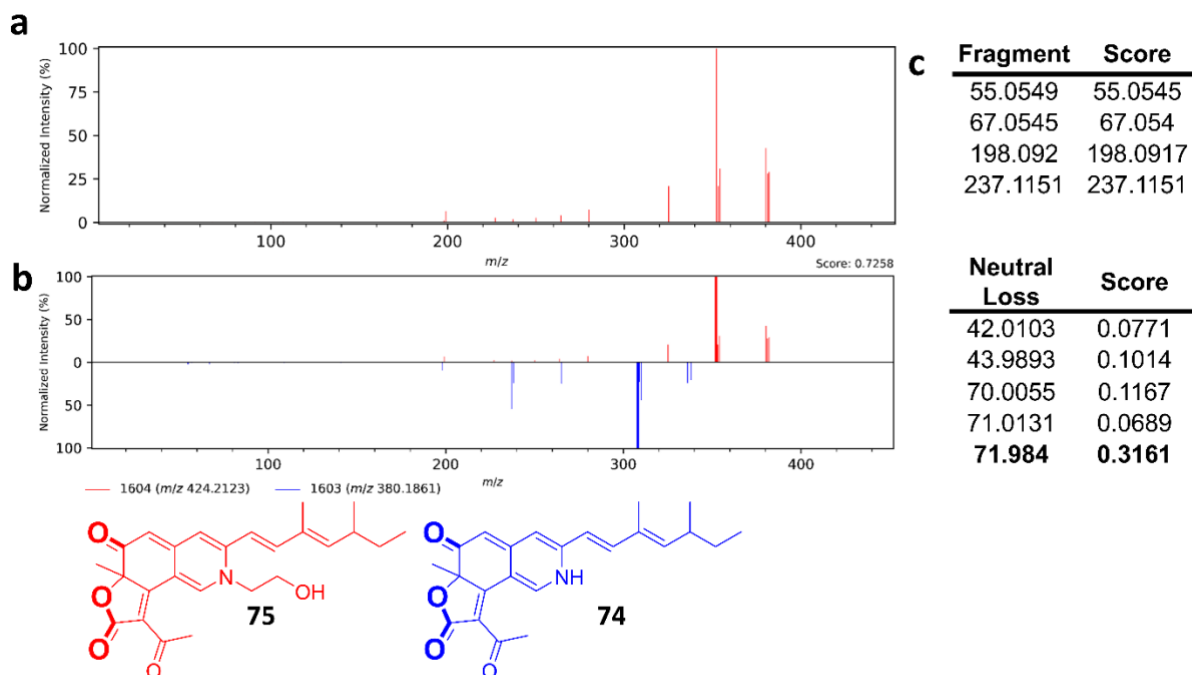

Annotation explanation: Its lactone ring fragmentation, its even  $m/z$  and the mass difference of  $m/z$  44.0263 with **74** (corresponding to  $C_2H_4O$ )

Figure S79: MS/MS information of compound **76** ( $m/z$  357.2065,  $-1.3$  ppm, level 2) from molecular network. (a) MS/MS spectrum of compound **76**, (b) the mirror plot of MS/MS spectra from compound **76** against **64** with common neutral loss from CO and OH (c) the common fragments and neutral losses with their contribution to cosine score.

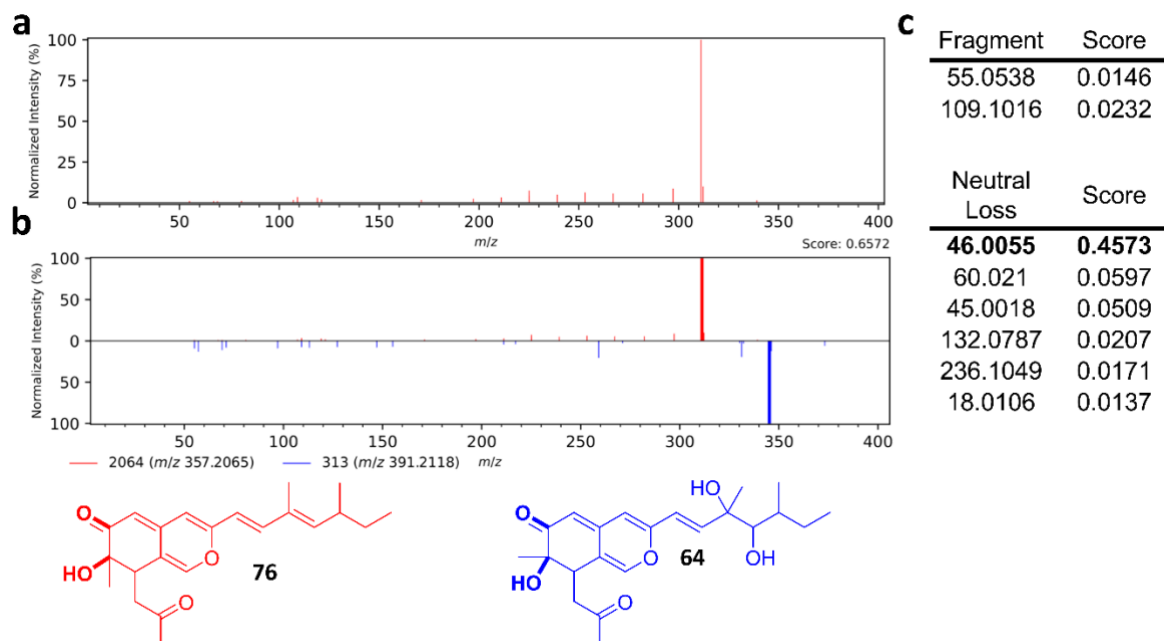

Annotation explanation: its mass difference from compound **64** was 34.0056 (corresponding to  $H_2O_2$ ) as support the lack of diol of compound **76**. Moreover compound **76** was already described and was produced by genetically close strain of *Penicillium* sp. [4]

Figure S80: MS/MS information of compound **77** ( $m/z$  391.1674,  $-0.9$  ppm, level 3) from molecular network. (a) MS/MS spectrum of compound **77**, (b) the mirror plot of MS/MS spectra from compound **77** against **76** with common neutral loss from CO and OH (c) the common fragments and neutral losses with their contribution to cosine score.

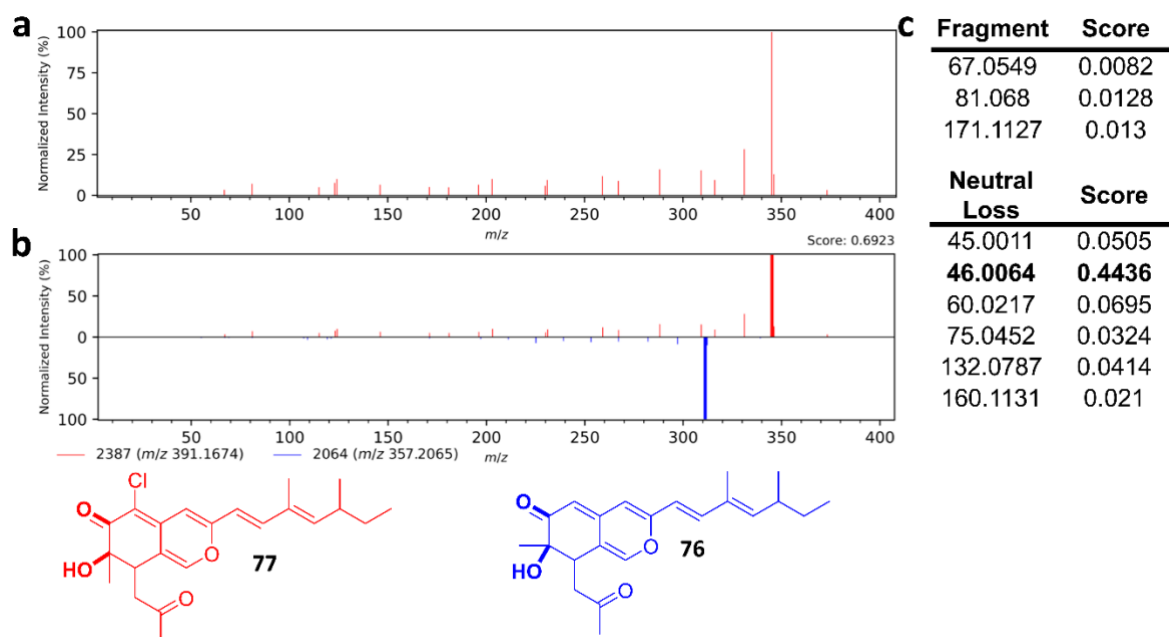

Annotation explanation: Its  $m/z$  difference with compound **76** was 33.9608. Moreover compound **77** was already described produced altogether with **76** by genetically close strain of *Penicillium* sp. [4]

Figure S81: MS/MS information of compound **78** ( $m/z$  373.2016,  $-1.8$  ppm, level 2) from molecular network. (a) MS/MS spectrum of compound **78**, (b) the mirror plot of MS/MS spectra from compound **78** against **64** with common neutral loss from CO and OH (c) common fragment and neutral loss with their contribution to cosine score.

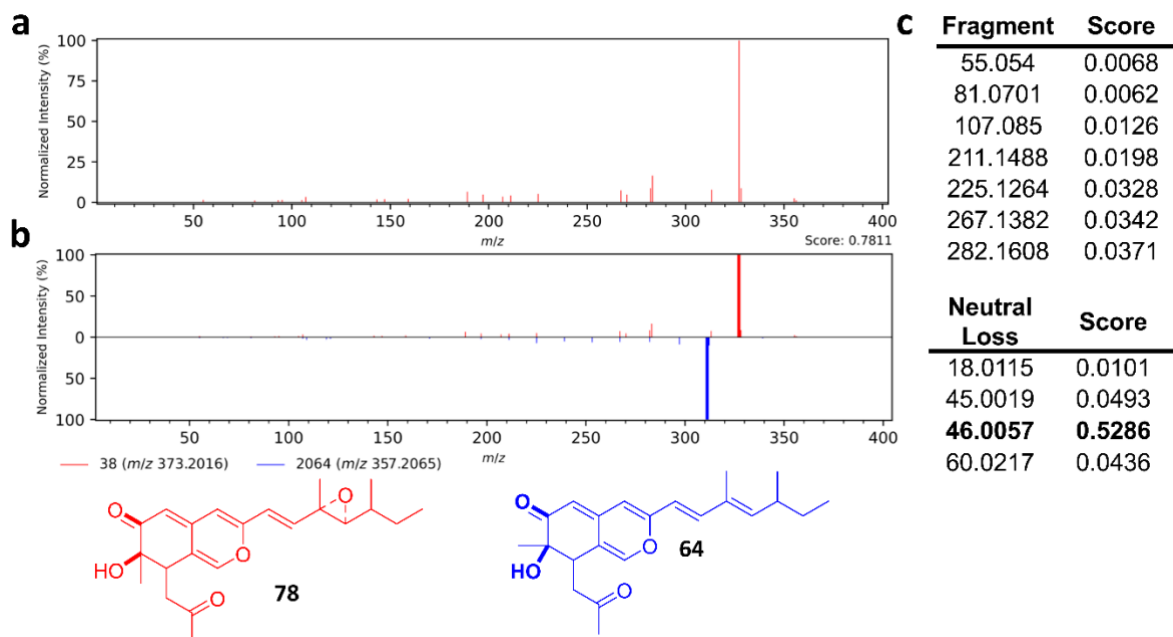

Annotation explanation: compound **78** possesses a neutral loss of 46.0057 Da (corresponding to CO + H<sub>2</sub>O) and its  $m/z$  difference from **64** is 15.9951 (corresponding to O).



Figure S82: MS/MS information of compound **79** ( $m/z$  407.1627,  $-1.8$  ppm, level 2) from molecular network. (a) MS/MS spectrum of compound **79**, (b) the mirror plot of MS/MS spectra from compound **79** against **78** with common neutral loss from CO and OH (c) common fragment and neutral loss with their contribution to cosine score.

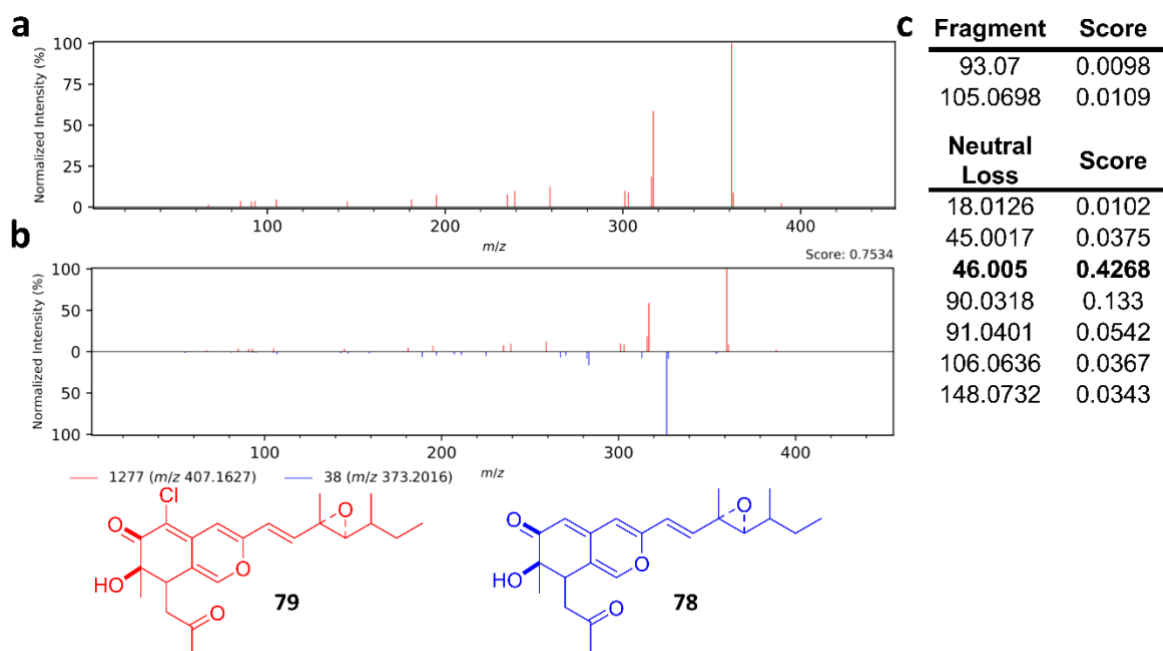

Annotation explanation: compound **79** possesses a neutral loss of 46.0057 Da (corresponding to CO + H<sub>2</sub>O) and its  $m/z$  difference from **79** is 15.9951 (corresponding to O).

TableS1: <sup>1</sup>H NMR spectroscopic data for compounds **1**, **2**, **5**, **23**, **75**, **63**, **80** and **74**

| Position  | $\delta$ H ( <i>J</i> in Hz) |                   |                   |               |                   |                   |                 |                   |
|-----------|------------------------------|-------------------|-------------------|---------------|-------------------|-------------------|-----------------|-------------------|
|           | <b>1</b>                     | <b>2</b>          | <b>5</b>          | <b>23</b>     | <b>75</b>         | <b>63</b>         | <b>80</b>       | <b>74</b>         |
|           | CDCl <sub>3</sub>            | CDCl <sub>3</sub> | CDCl <sub>3</sub> | MeOD          | CDCl <sub>3</sub> | CDCl <sub>3</sub> | DMF- <i>d</i> 7 | CDCl <sub>3</sub> |
| <b>1</b>  | 7.90, s                      | 7.93, s           | 7.83, s           | 8.88, s       | 7.91, s           | 7.42, s           | 8.10, s         | 9.32, s           |
| <b>3</b>  |                              |                   |                   |               |                   |                   |                 |                   |
| <b>4</b>  | 6.61, s                      | 6.86, s           | 6.99, s           | 6.81, s       | 6.77, s           | 6.56, s           | 7.00, s         | 6.8, s            |
| <b>5</b>  |                              |                   |                   |               | 6.57, s           |                   |                 | 6.78, s           |
| <b>8</b>  |                              |                   |                   |               |                   | 3.84, d(12.5)     |                 |                   |
| <b>9</b>  | 6.51, d(15.9)                | 6.13, d(16.1)     | 6.23, d(15.9)     | 6.35, d(15.6) | 6.28, d(15.5)     | 6.41, d(15.5)     | 6.70, d(15.8)   | 6.28, d(16.4)     |
| <b>10</b> | 7.03, d(15.9)                | 7.04, d(16.7)     | 6.91, d(15.6)     | 7.19, d(16.0) | 6.95, d(15.5)     | 6.65, d(15.7)     | 7.23, d(15.7)   | 7.57, d(16.8)     |
| <b>11</b> |                              |                   |                   |               |                   |                   |                 |                   |
| <b>12</b> | 5.67, (d10.0)                | 5.69, d(9.9)      | 5.68, d(9.9)      | 5.77, d(9.8)  | 5.70, d(9.5)      | 3.49, d(1.2)      | 5.87, d(9.5)    | 5.82, d(10.4)     |
| <b>13</b> | 2.45, m                      | 2.47, m           | 2.47, m           | 2.52, m       | 2.47, m           | 1.7, m            | 2.53, m         | 2.49, m           |
| <b>14</b> | 1.39/1.29, m                 | 1.40/1.30, m      | 1.42/1.32, m      | 1.46/1.34, m  | 1.42/1.32, m      | 1.39/1.31, m      | 1.43/1.34, m    | 1.43/1.34, m      |
| <b>15</b> | 0.83, t(7.5)                 | 0.84, t(7.5)      | 0.86, t(7.5)      | 0.89, d(7.6)  | 0.86, t(7.4)      | 0.9, t(7.4)       | 0.87, t(7.4)    | 0.86, t(7.4)      |
| <b>16</b> | 0.98, d(6.8)                 | 0.99, d(6.6)      | 1.00, d(6.7)      | 1.03, d(6.6)  | 1.00, d(6.8)      | 0.95, d(6.7)      | 1.01, d(6.6)    | 0.99, d(6.7)      |
| <b>17</b> | 1.81, s                      | 1.83, s           | 1.82, s           | 1.88, s       | 1.86, s           | 1.34, s           | 1.92, s         | 1.88, s           |
| <b>18</b> | 1.53, s                      | 1.57, s           | 1.52, s           | 1.68, s       | 1.57, s           | 1.59, s           | 1.41, s         | 1.8, s            |
| <b>20</b> | 2.13, s                      | 2.16, s           | 2.13, s           |               |                   |                   |                 |                   |
| <b>1'</b> |                              |                   | 3.99, m           |               | 4.13, m           |                   | 4.38, m         |                   |
| <b>2'</b> |                              |                   | 3.91, m           |               | 4.06, m           |                   | 3.88, m         |                   |
| <b>3"</b> |                              |                   |                   |               |                   | 3.76, d(12.5)     |                 |                   |
| <b>5"</b> |                              |                   |                   | 2.55, s       | 2.35, s           | 2.45, s           |                 | 2.49, s           |

Table S2:  $^{13}\text{C}$  NMR spectroscopic data for compounds **1**, **2**, **5**, **23**, **63**, **74**, **75**, **80**  
Position  $\delta\text{C}$ , type

|            | <b>1<sup>d</sup></b>  | <b>2<sup>a</sup></b>  | <b>5<sup>a</sup></b>  | <b>75<sup>a</sup></b> | <b>63<sup>a</sup></b> | <b>80<sup>b</sup></b> | <b>74<sup>c</sup></b> |
|------------|-----------------------|-----------------------|-----------------------|-----------------------|-----------------------|-----------------------|-----------------------|
| <b>1</b>   | 152.8, CH             | 138.4, CH             | 142.0, CH             | 142.6, CH             | 146.5, CH             | 142.6, CH             | 141.3, CH             |
| <b>3</b>   | 158.4, C              | 146.3, C              | 144.8, C              | 149.8, C              | 157.3, C              | 149.8, C              | 148.8, C              |
| <b>4</b>   | 110.8, CH             | 110.3, CH             | 111.8, CH             | 117.0, CH             | 106.1, CH             | 109.7, CH             | 117.1, CH             |
| <b>4a</b>  | 138.8, C              | 147.1, C              | 148.5, C              | 150.3, C              | 140.4, C              | 145.9, C              | 154, C                |
| <b>5</b>   | 106.6, C              | 101.5, C              | 102.2, C              | 98.0, CH              | 113.6, C              | 98.8, C               | 99.1, CH              |
| <b>6</b>   | 186.0, C              | 183.7, C              | 184.4, C              | 194.4, C              | 184.5, C              | 187.1, C              | 195.5, C              |
| <b>7</b>   | 84.7, C               | 85.4, C               | 84.9, C               | 85.3, C               | 83.4, C               | 83.1, C               | 86.9, C               |
| <b>8</b>   | 192.0, C              | 193.3, C              | 194.0, C              | 171.5, C              | 42.6, CH              | 197.5, C              | 172.5, C              |
| <b>8a</b>  | 114.8, C              | 114.2, C              | 114.6, C              | 117.2, C              | 110.2, C              | 115.1, C              | 117.5, C              |
| <b>9</b>   | 115.9, CH             | 116.4, CH             | 115.1, CH             | 114.8, CH             | 120.2, CH             | 117.2, CH             | 116.5, CH             |
| <b>10</b>  | 143.0, CH             | 142.9, CH             | 145.1, CH             | 146.2, CH             | 145.5, CH             | 144.3, CH             | 144.6, CH             |
| <b>11</b>  | 132.2, C              | 132.0, C              | 131.7, C              | 132.0, C              | 75.9, C               | 133.2, C              | 132.5, C              |
| <b>12</b>  | 149.0, CH             | 148.7, CH             | 148.0, CH             | 149.0, CH             | 78.4, CH              | 146.8, CH             | 149.7, CH             |
| <b>13</b>  | 35.3, CH              | 35.1, CH              | 35.0, CH              | 35.1, CH              | 35.5, CH              | 34.8, CH              | 35.4, CH              |
| <b>14</b>  | 30.2, CH <sub>2</sub> | 30.6, CH <sub>2</sub> | 30.0, CH <sub>2</sub> | 28.6, CH <sub>2</sub> | 28.7, CH <sub>2</sub> | 29.8, CH <sub>2</sub> | 30.3, CH <sub>2</sub> |
| <b>15</b>  | 12.1, CH <sub>3</sub> | 12.0, CH <sub>3</sub> | 12.0, CH <sub>3</sub> | 12.0, CH <sub>3</sub> | 12.0, CH <sub>3</sub> | 11.8, CH <sub>3</sub> | 12.2, CH <sub>3</sub> |
| <b>16</b>  | 20.2, CH <sub>3</sub> | 20.1, CH <sub>3</sub> | 20.2, CH <sub>3</sub> | 20.2, CH <sub>3</sub> | 24.0, CH <sub>3</sub> | 20.1, CH <sub>3</sub> | 20.5, CH <sub>3</sub> |
| <b>17</b>  | 12.5, CH <sub>3</sub> | 12.4, CH <sub>3</sub> | 12.6, CH <sub>3</sub> | 12.6, CH <sub>3</sub> | 13.5, CH <sub>3</sub> | 12.3, CH <sub>3</sub> | 12.4, CH <sub>3</sub> |
| <b>18</b>  | 22.7, CH <sub>3</sub> | 23.6, CH <sub>3</sub> | 23.3, CH <sub>3</sub> | 30.2, CH <sub>3</sub> | 23.4, CH <sub>3</sub> | 28.2, CH <sub>3</sub> | 29.9, CH <sub>3</sub> |
| <b>19</b>  | 170.3, C              | 170.9, C              | 170.2, C              |                       |                       |                       |                       |
| <b>20</b>  | 20.3, CH <sub>3</sub> | 20.6, CH <sub>3</sub> | 20.3, CH <sub>3</sub> |                       |                       |                       |                       |
| <b>1'</b>  |                       |                       | 55.4, CH <sub>2</sub> | 57.1, CH <sub>2</sub> |                       | 56.6, CH <sub>2</sub> |                       |
| <b>2'</b>  |                       |                       | 60.9, CH <sub>2</sub> | 60.4, CH <sub>2</sub> |                       | 60.5, CH <sub>2</sub> |                       |
| <b>2''</b> |                       |                       |                       | 172.3, C              | 168.1, C              |                       | 175, C                |
| <b>3''</b> |                       |                       |                       | 103.6, C              | 57.3, CH              |                       | 101.2, C              |
| <b>4''</b> |                       |                       |                       | 193.9, C              | 199.7, C              |                       | 193.5, C              |
| <b>5''</b> |                       |                       |                       | 30.0, CH <sub>3</sub> | 30.3, CH <sub>3</sub> |                       | 28.6, CH <sub>3</sub> |

<sup>a</sup> Recorded at 500 MHz in CDCl<sub>3</sub>

<sup>b</sup> Recorded at 700 MHz in DMF-*d*<sub>7</sub>

<sup>b</sup> Recorded at 300 MHz in CDCl<sub>3</sub>

<sup>d</sup> Recorded at 600 MHz in CDCl<sub>3</sub>

Figure S83:  $^1\text{H}$  NMR spectrum ( $\text{CDCl}_3$ ) of compound **1**

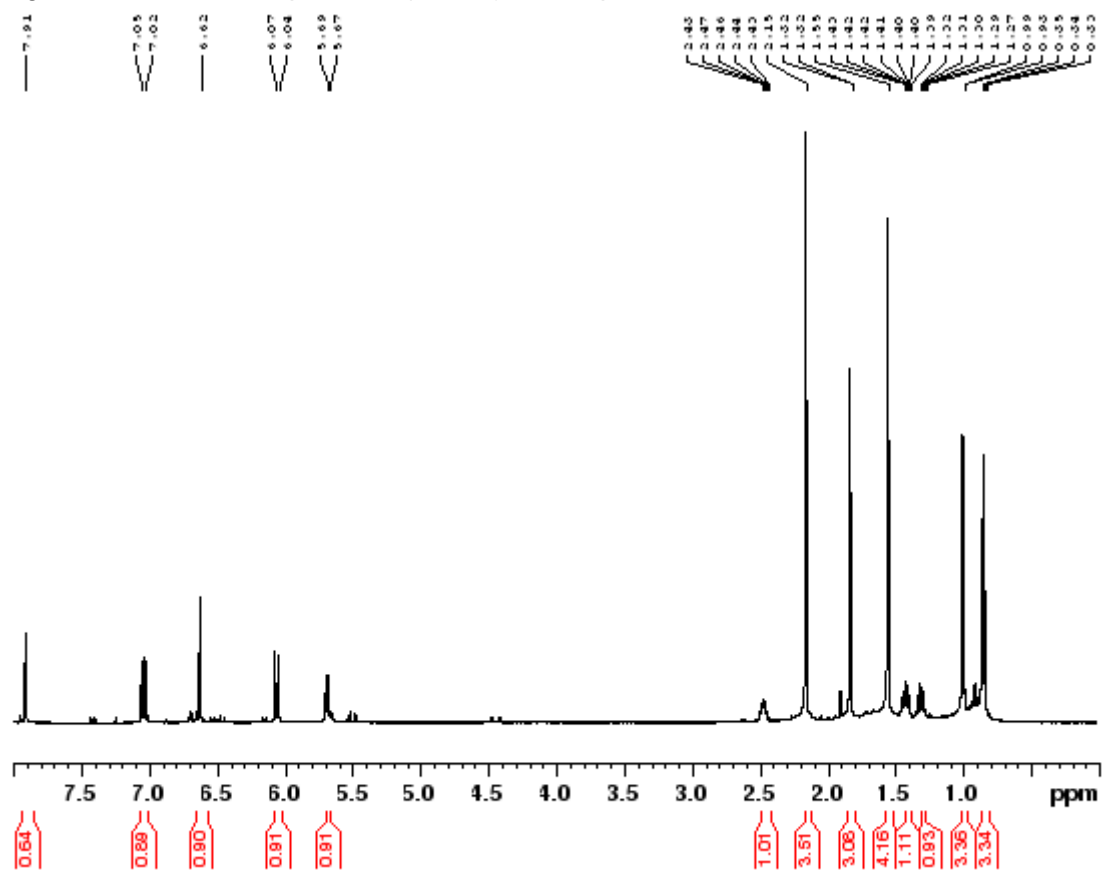

Figure S84:  $^{13}\text{C}$  NMR spectrum ( $\text{CDCl}_3$ ) of compound **1**

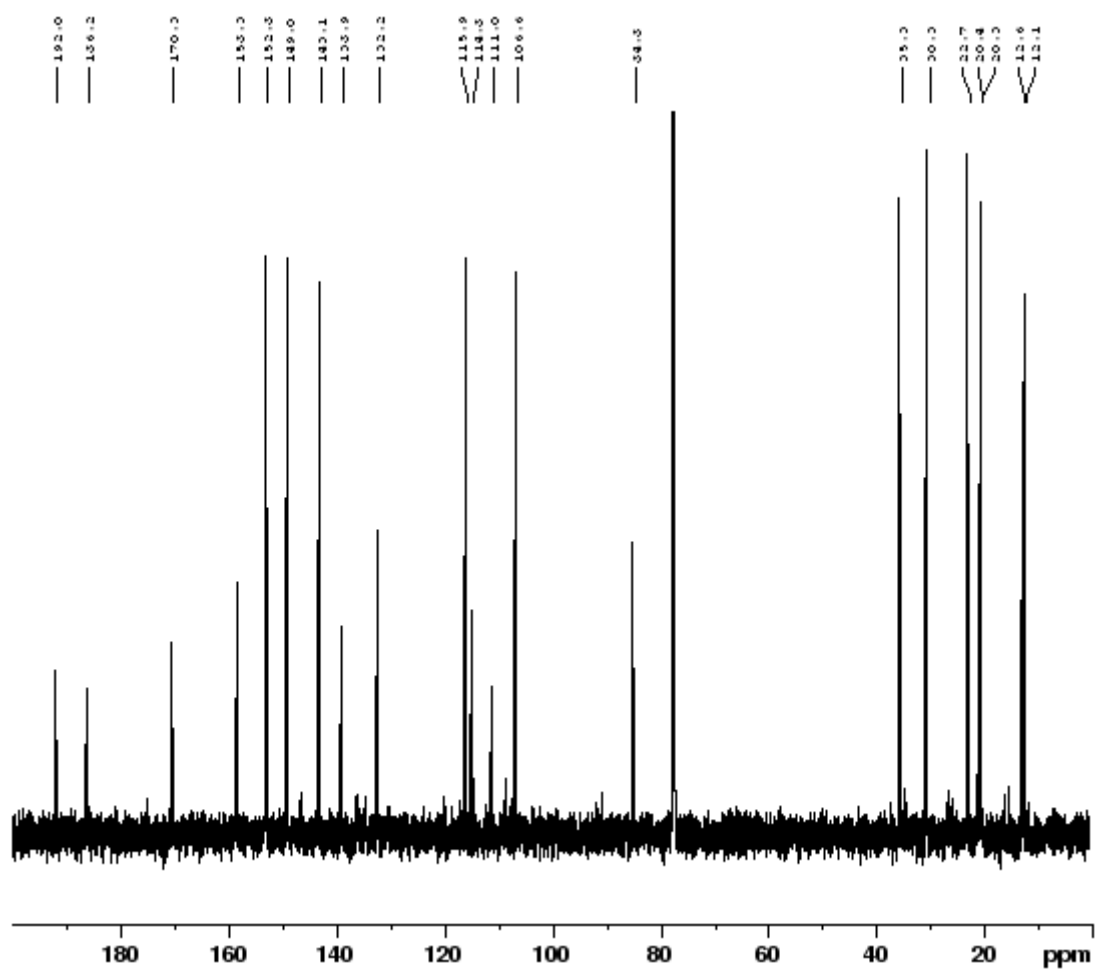

Figure S85: HRMS of compound 1

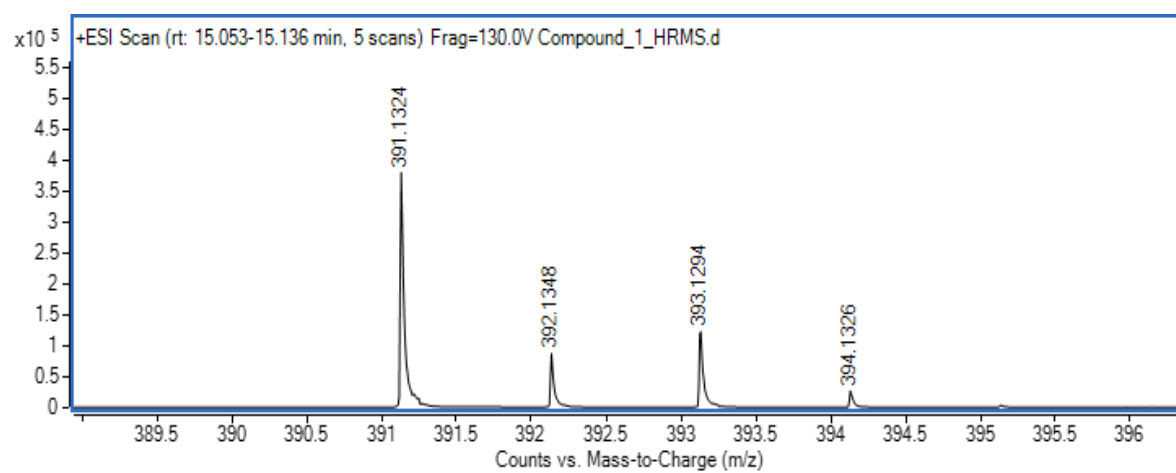

Figure S86:  $^1\text{H}$  NMR spectrum ( $\text{CDCl}_3$ ) of compound **2**

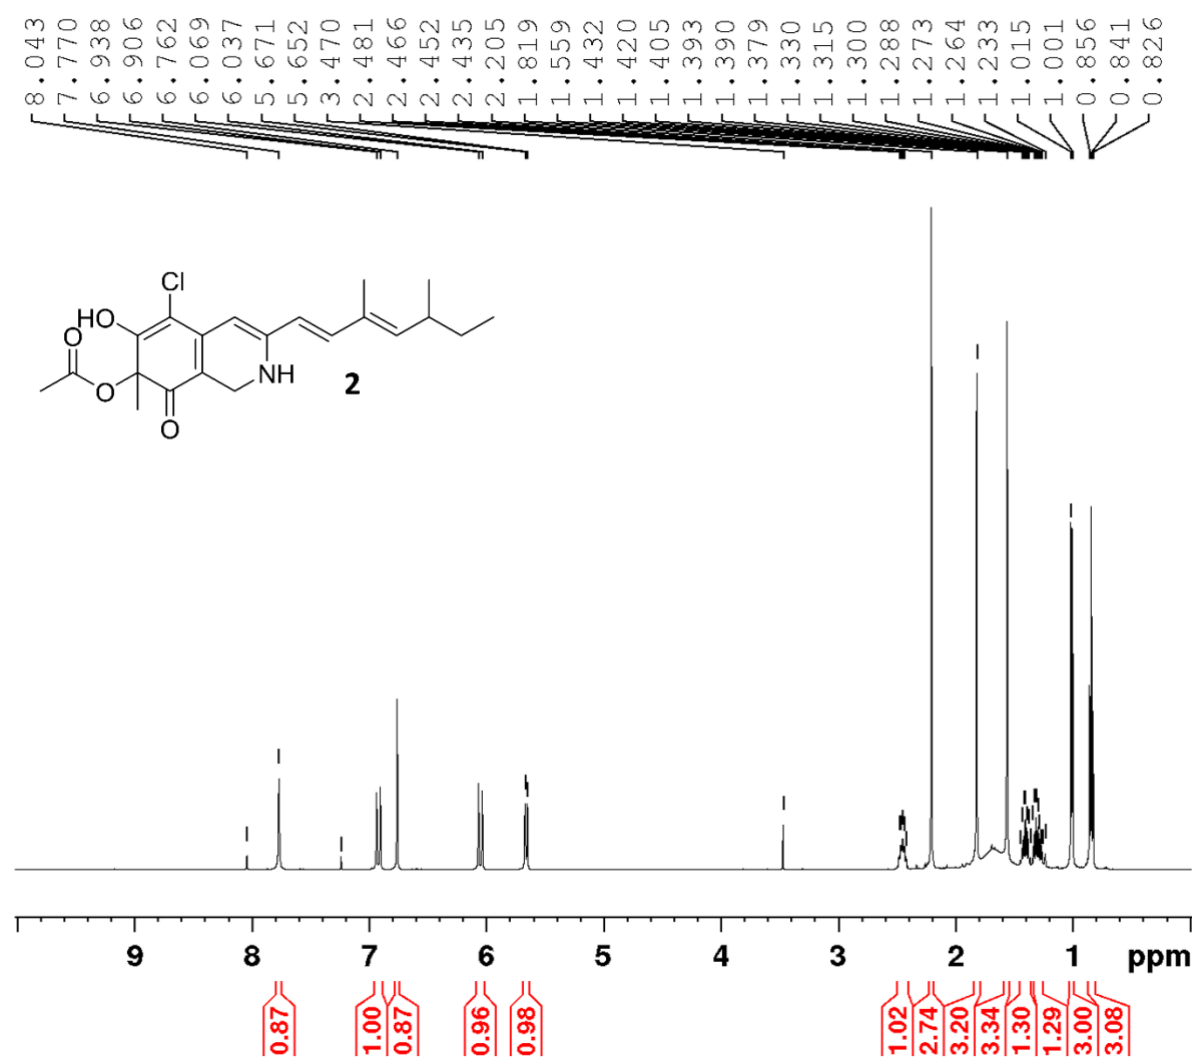

Figure 87:  $^{13}\text{C}$  NMR spectrum ( $\text{CDCl}_3$ ) of compound **2**

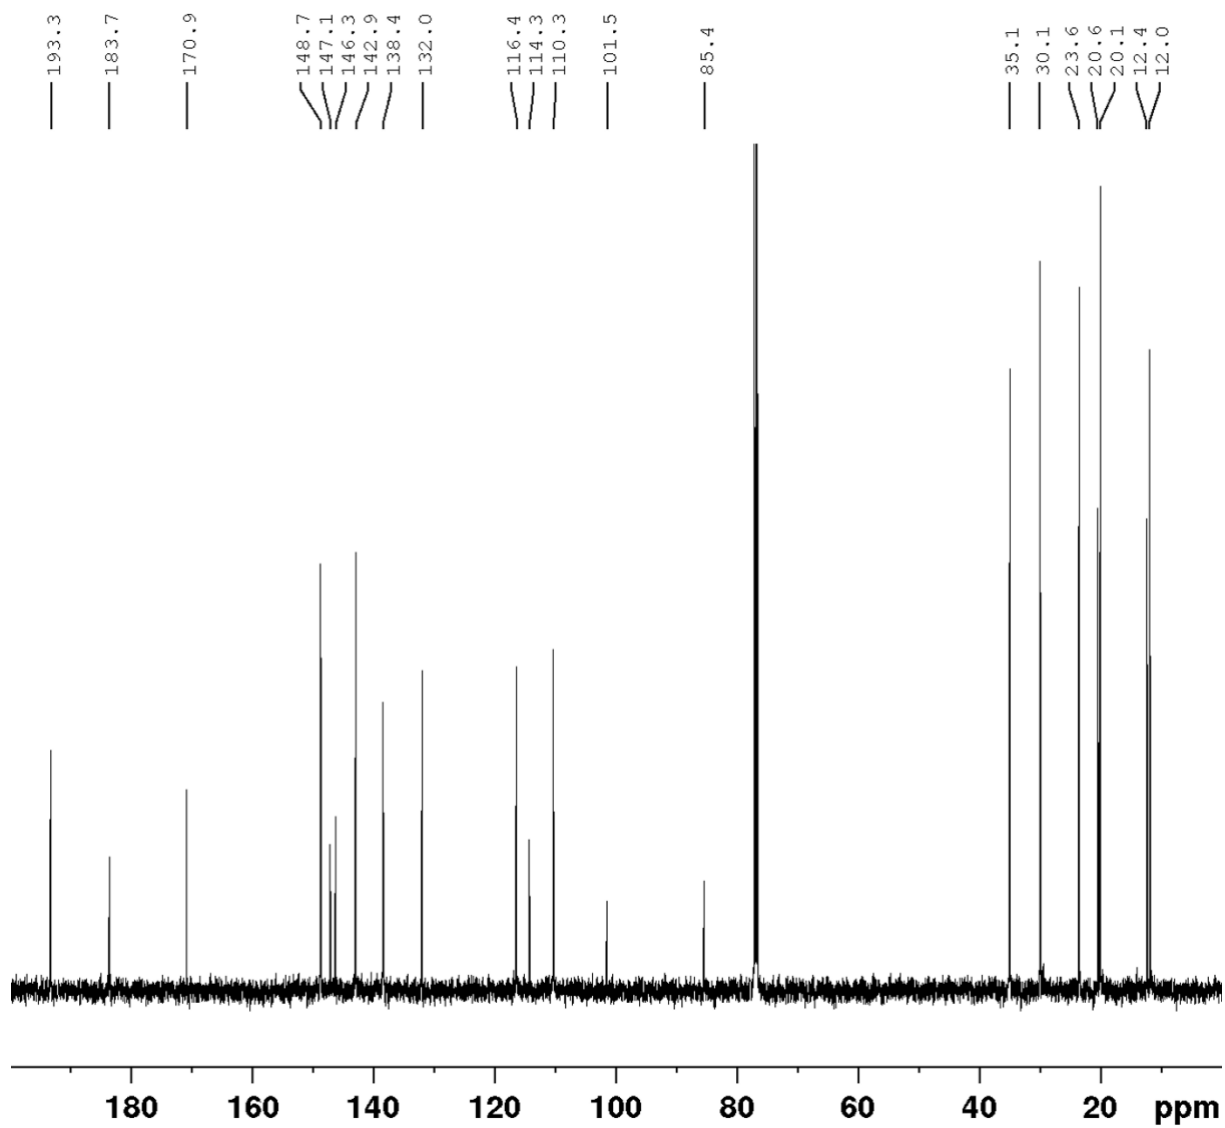



Figure 88: HRMS of compound **2**

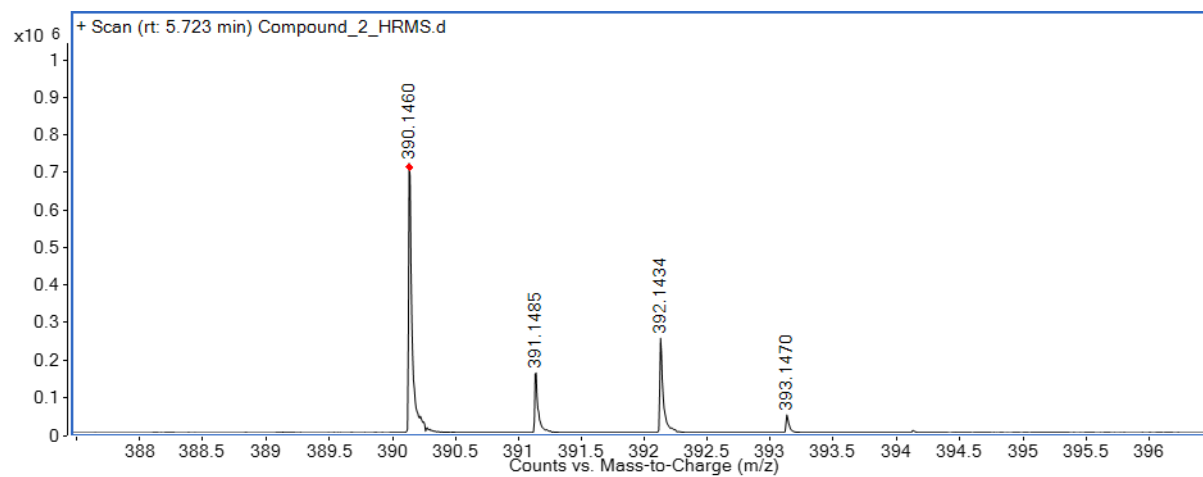

Figure S89:  $^1\text{H}$  NMR spectrum ( $\text{CDCl}_3$ ) of compound **5**

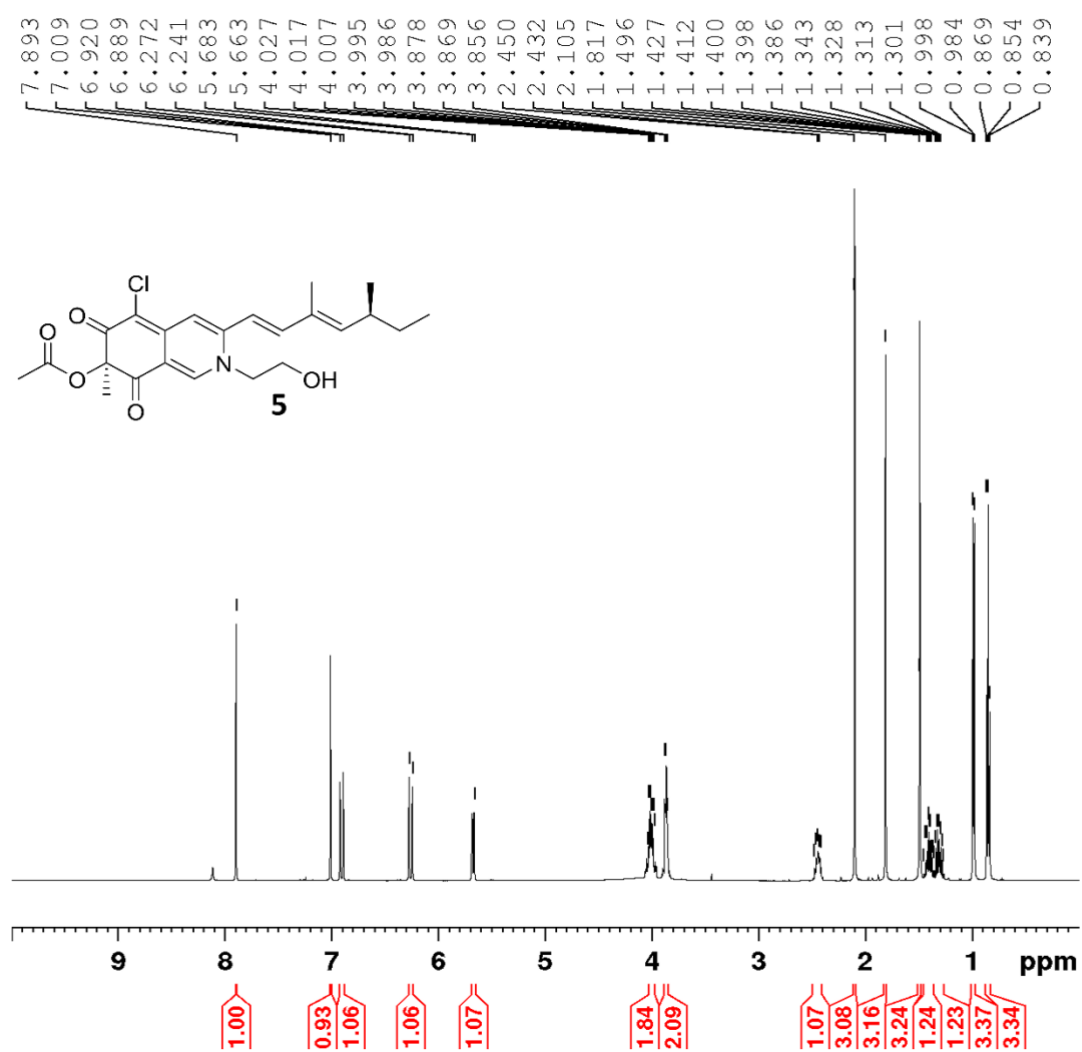

Figure S90:  $^{13}\text{C}$  NMR spectrum ( $\text{CDCl}_3$ ) of compound **5**

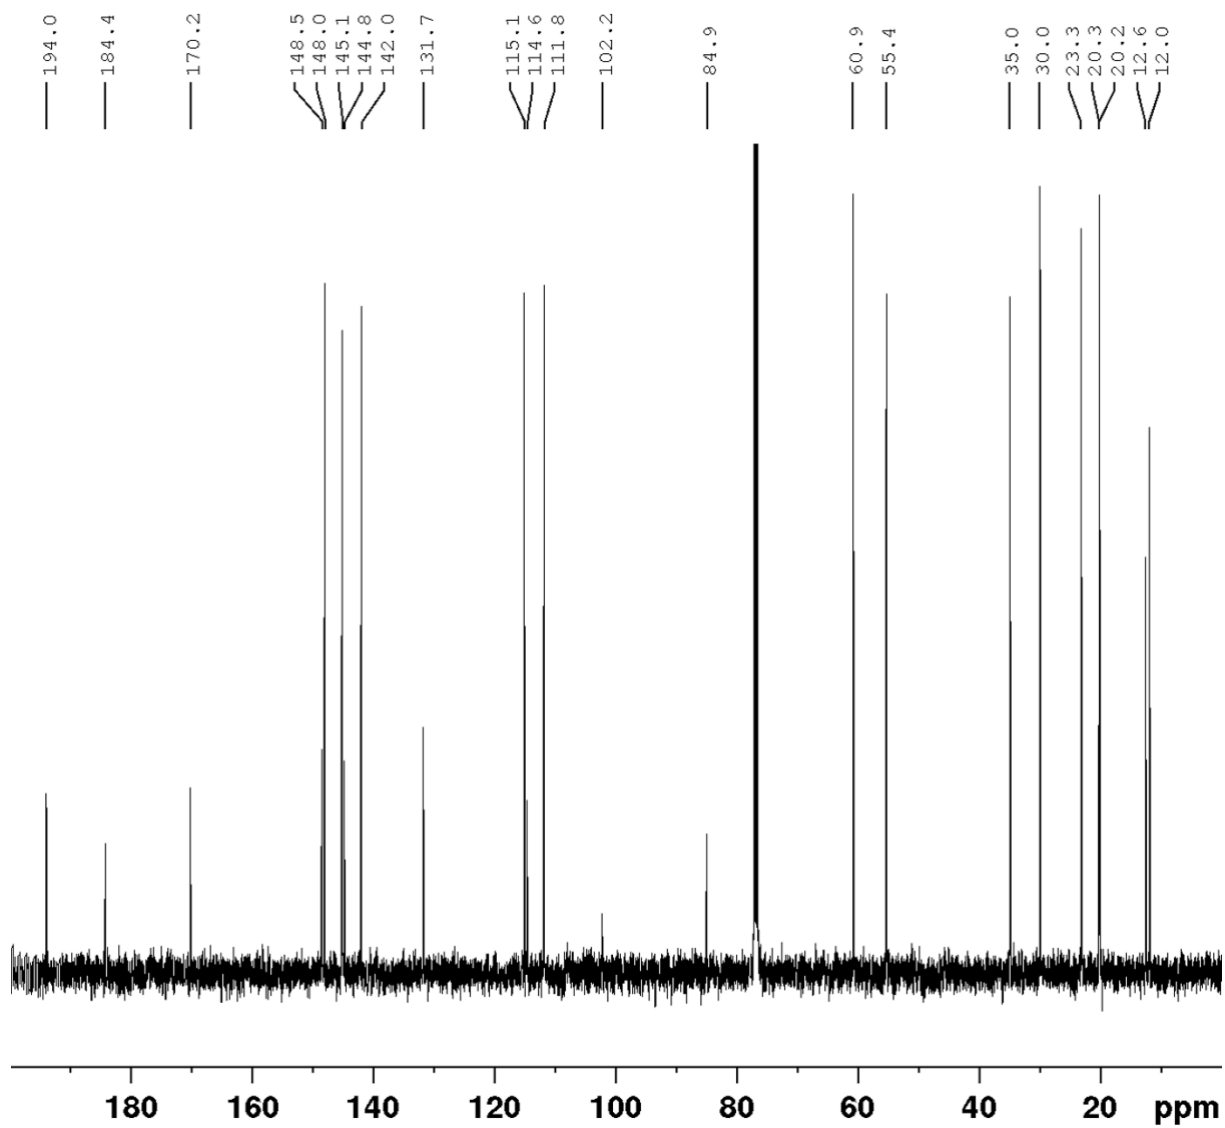

Figure S91: HRMS of compound **5**

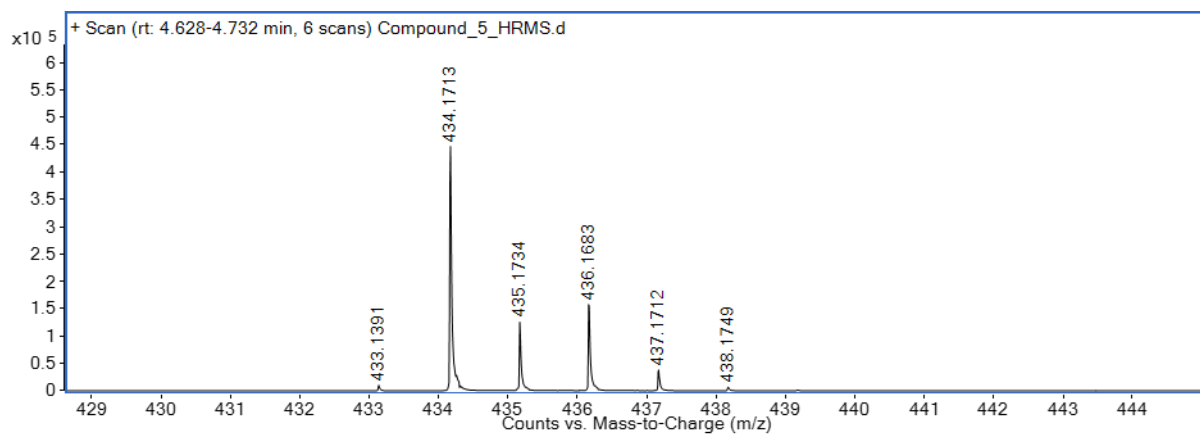

Figure S92:  $^1\text{H}$  NMR (MeOD) spectrum of compound compound **23**

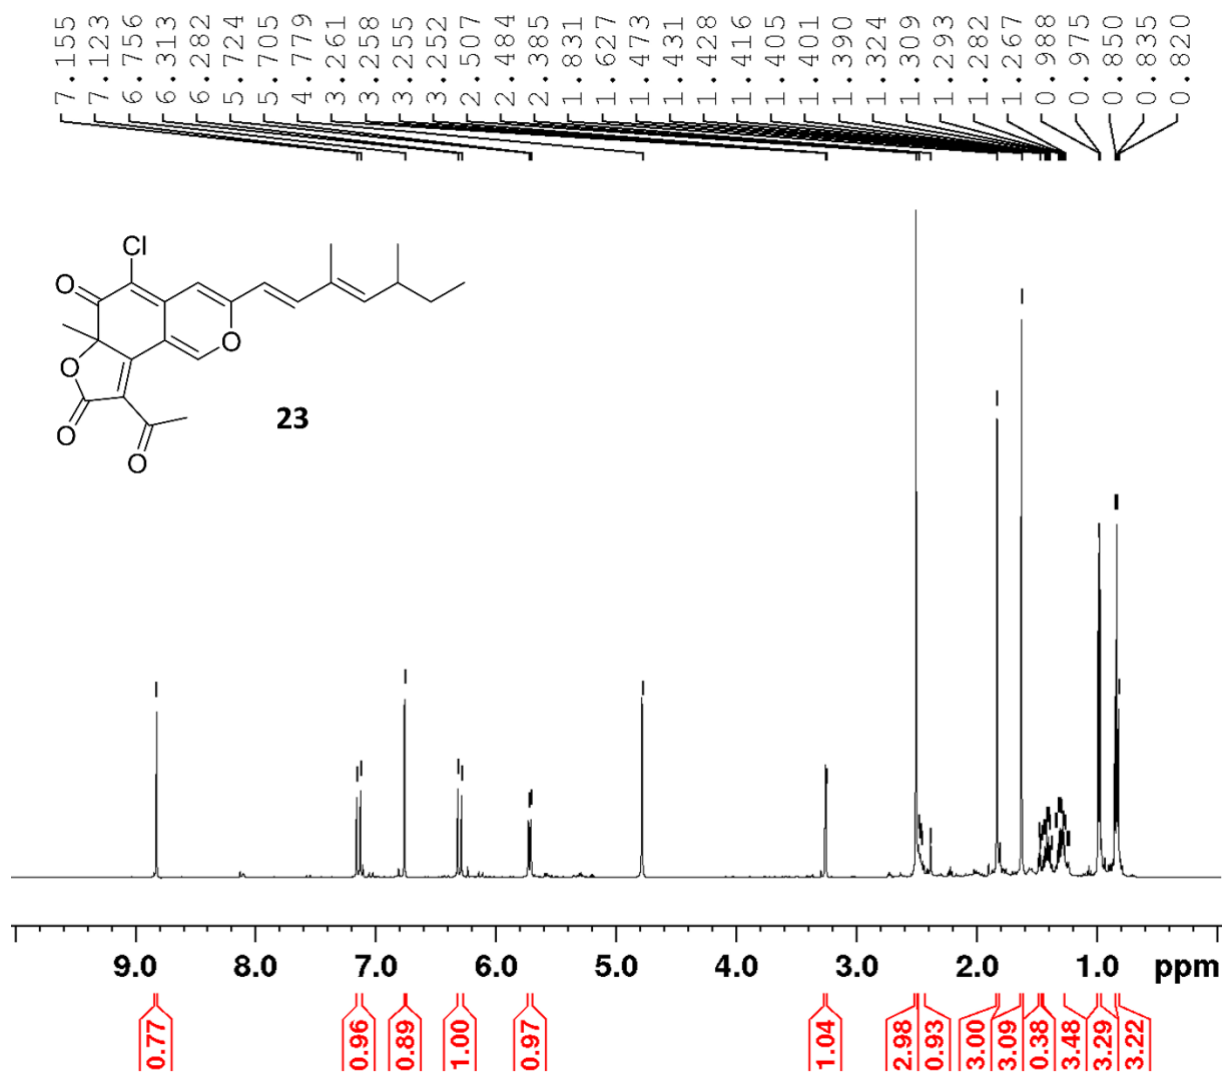

Figure S93: HRMS of compound **23**

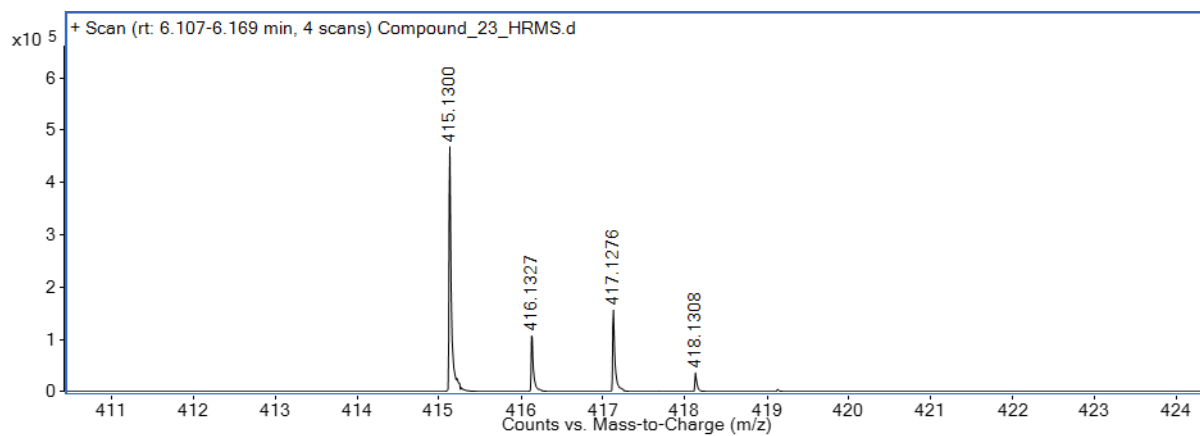

Figure S94:  $^1\text{H}$  NMR spectrum ( $\text{CDCl}_3$ ) of compound **75**

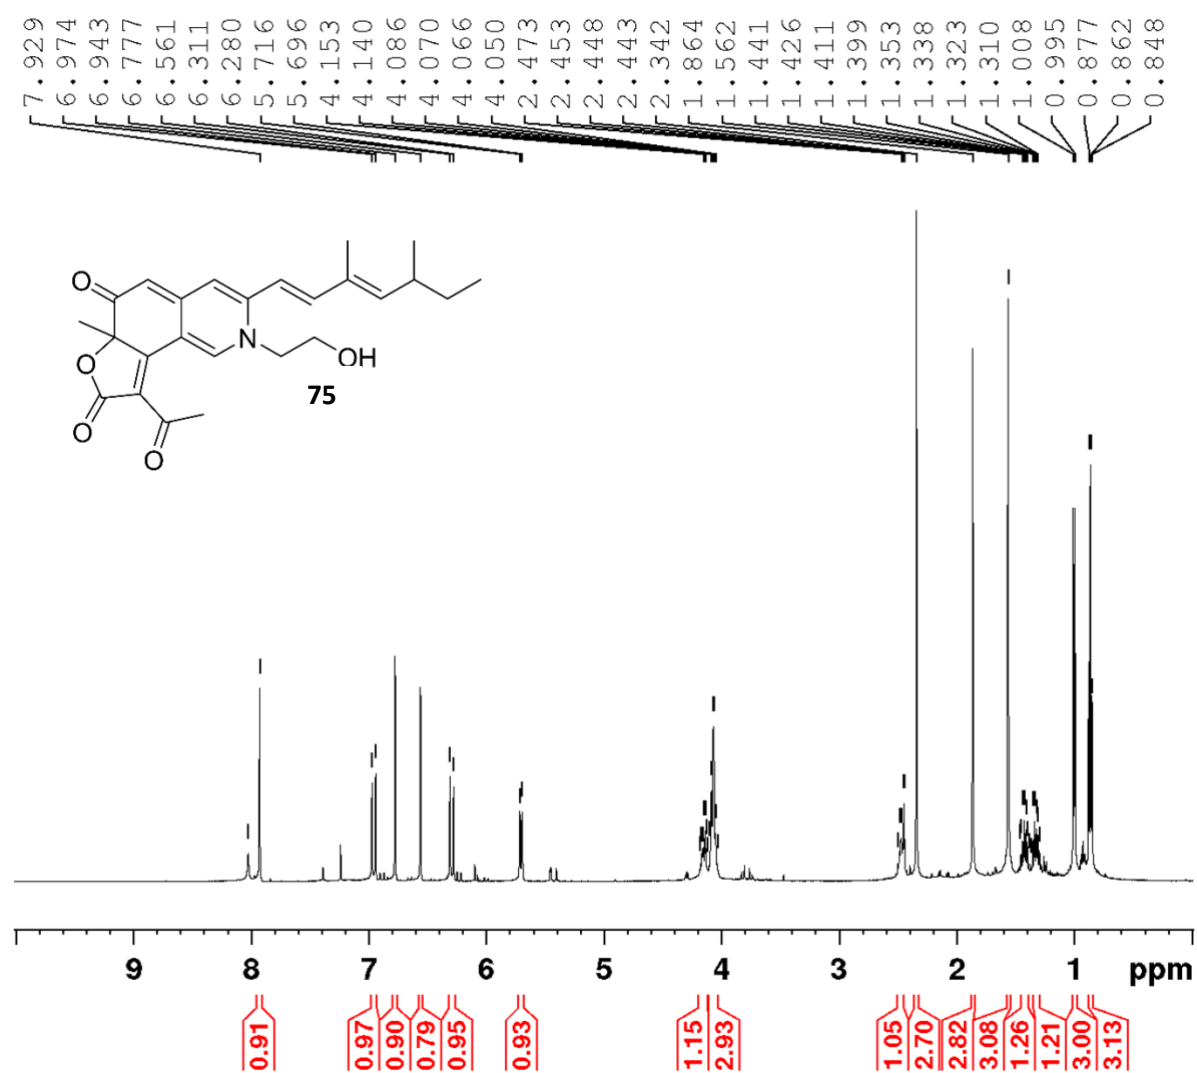

Figure S95:  $^{13}\text{C}$  NMR ( $\text{CDCl}_3$ ) spectrum of compound **75**

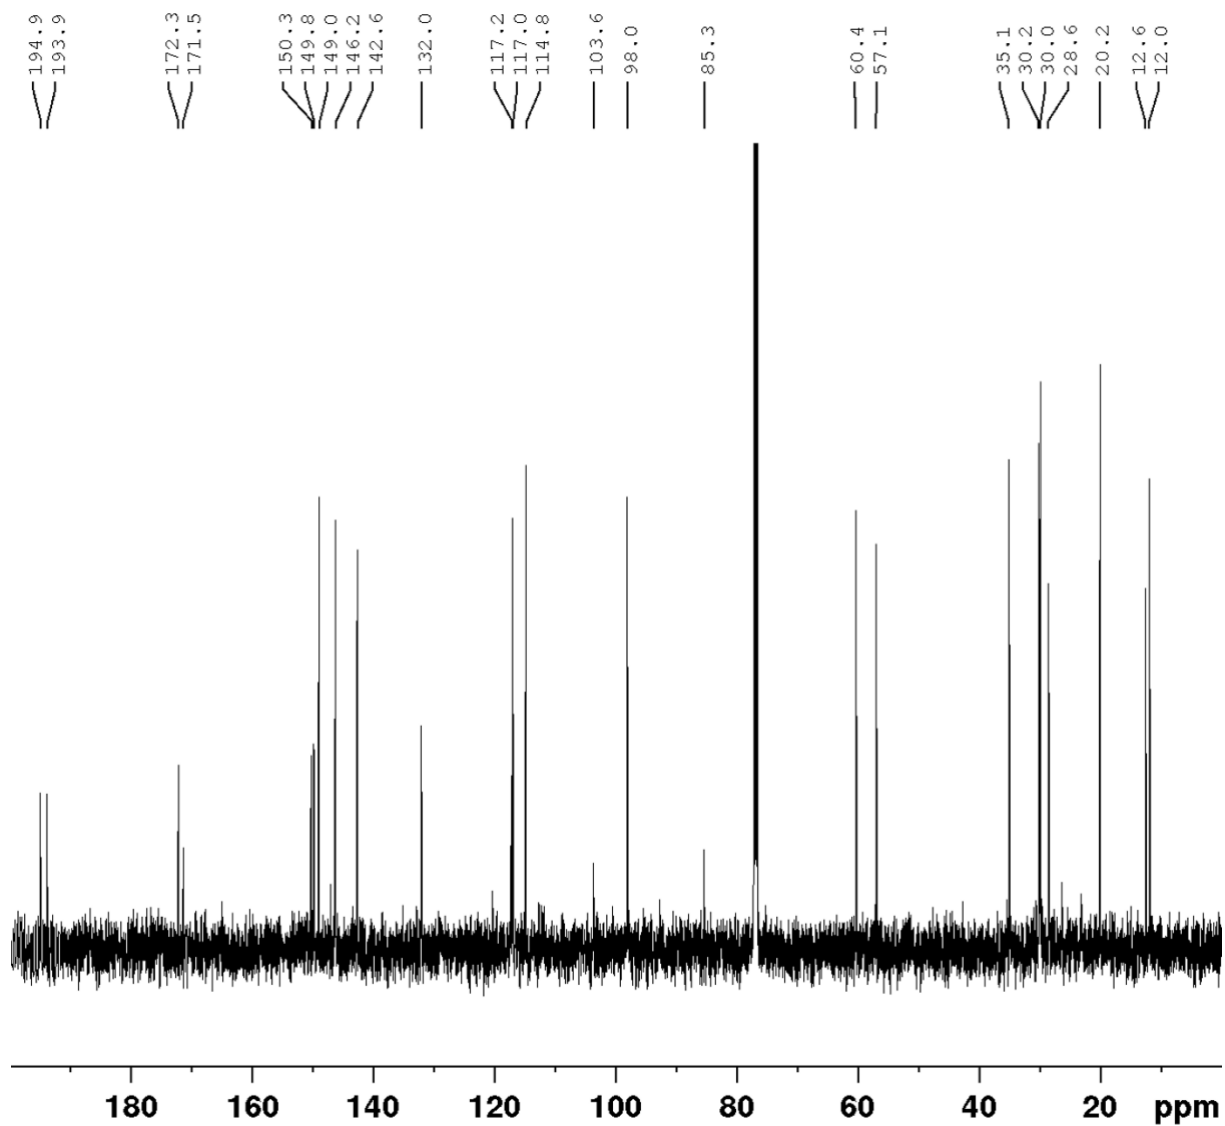



Figure S96: HRMS of compound **75**

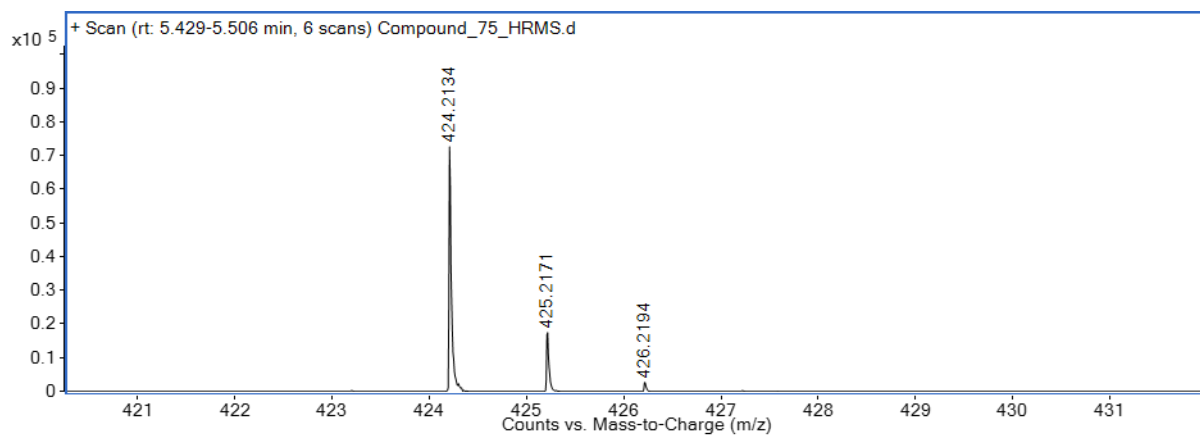

Figure S97:  $^1\text{H}$  NMR spectrum ( $\text{CDCl}_3$ ) of compound **63**

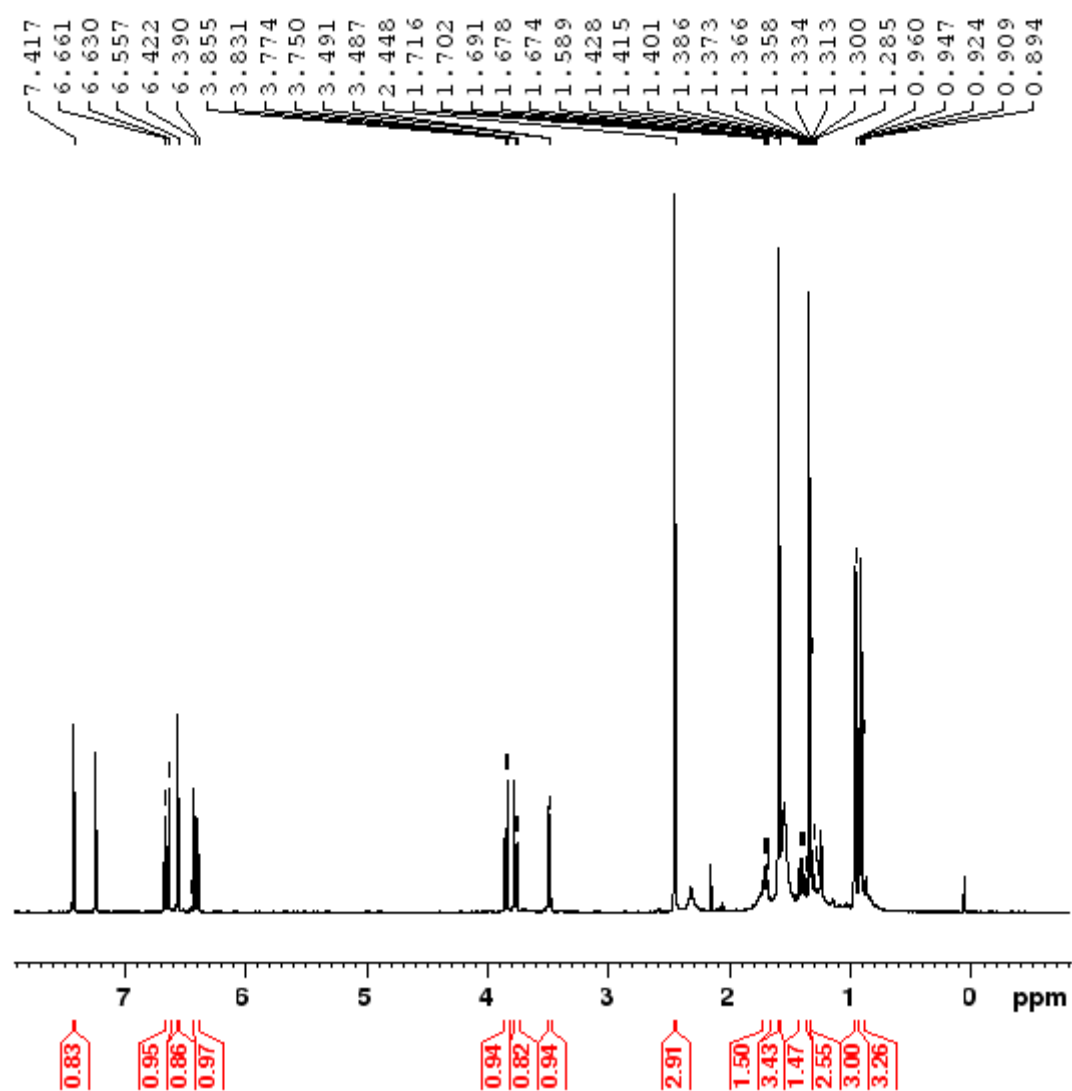

Figure S98:  $^{13}\text{C}$  NMR spectrum ( $\text{CDCl}_3$ ) of compound **63**

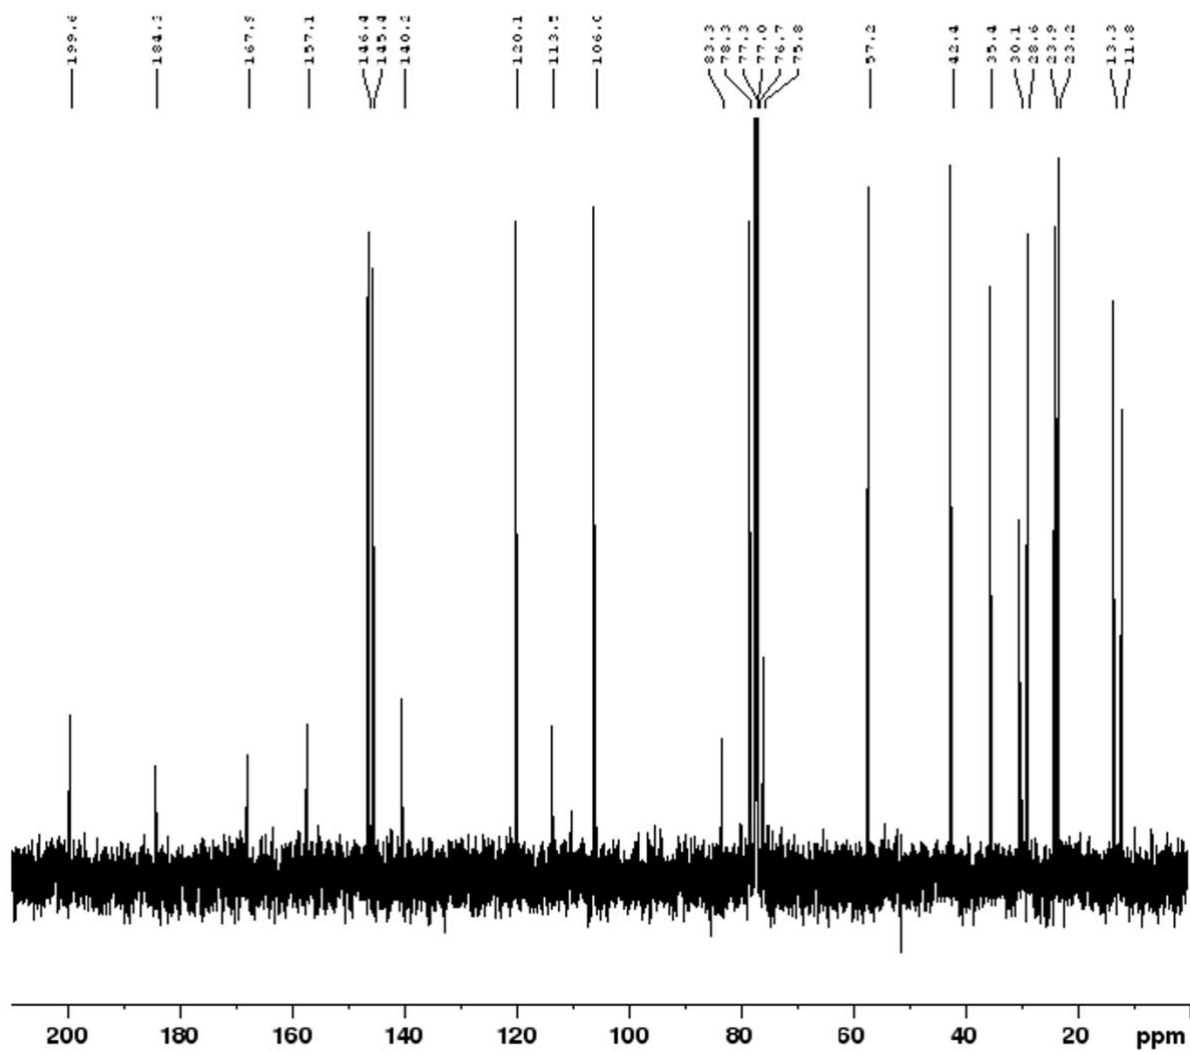

Figure S99: COSY NMR spectrum ( $\text{CDCl}_3$ ) of compound **63**

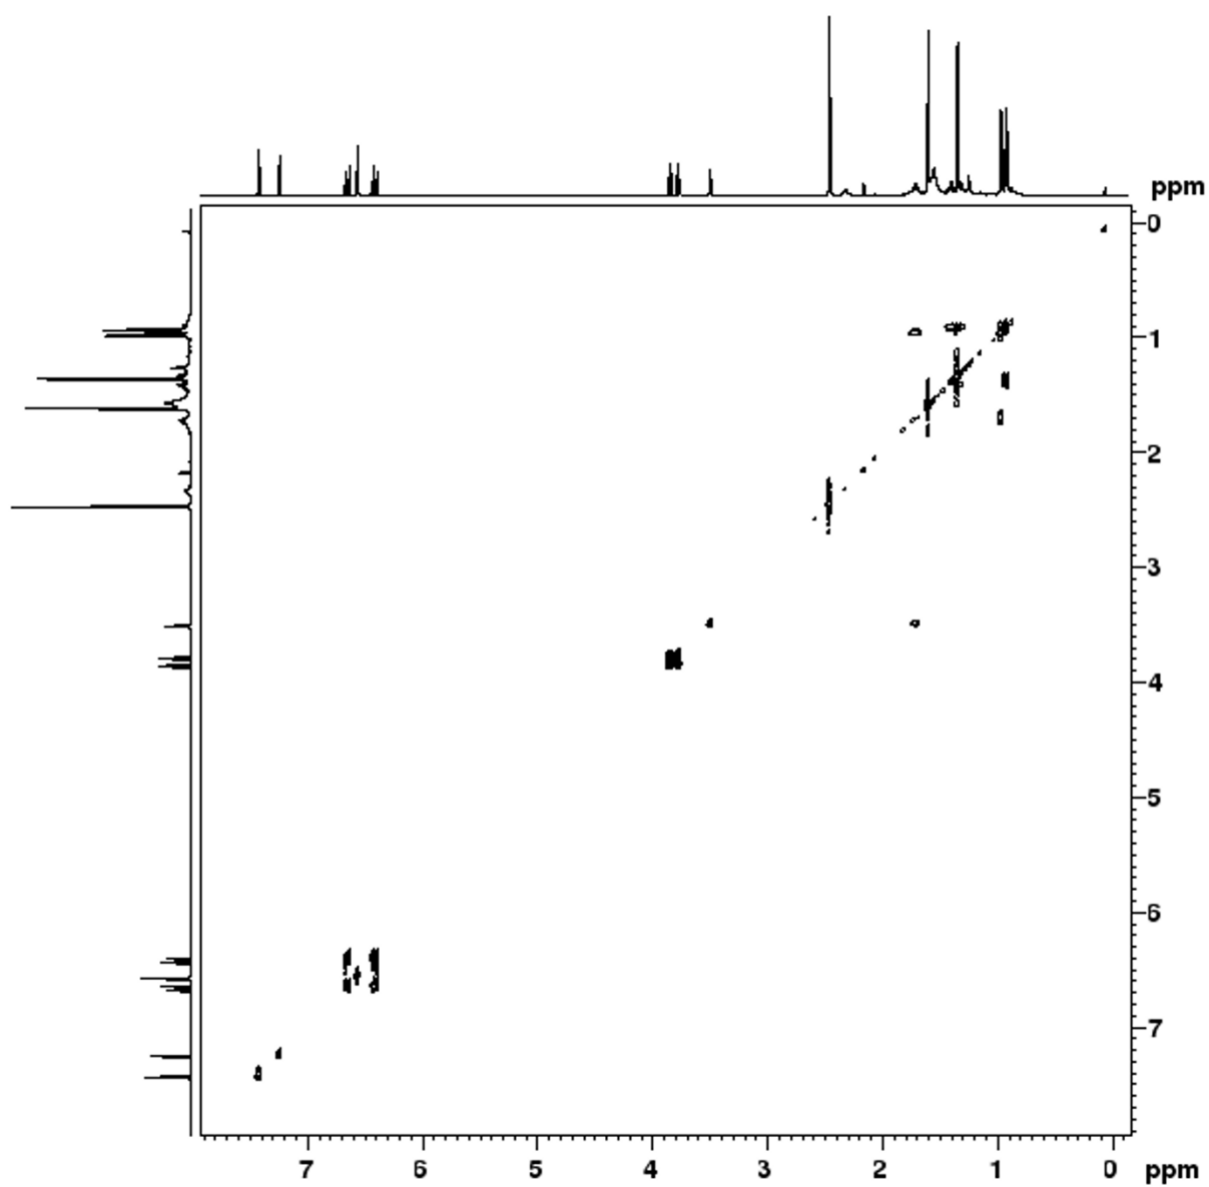

Figure S100: HSQC NMR spectrum (CDCl<sub>3</sub>) of compound **63**

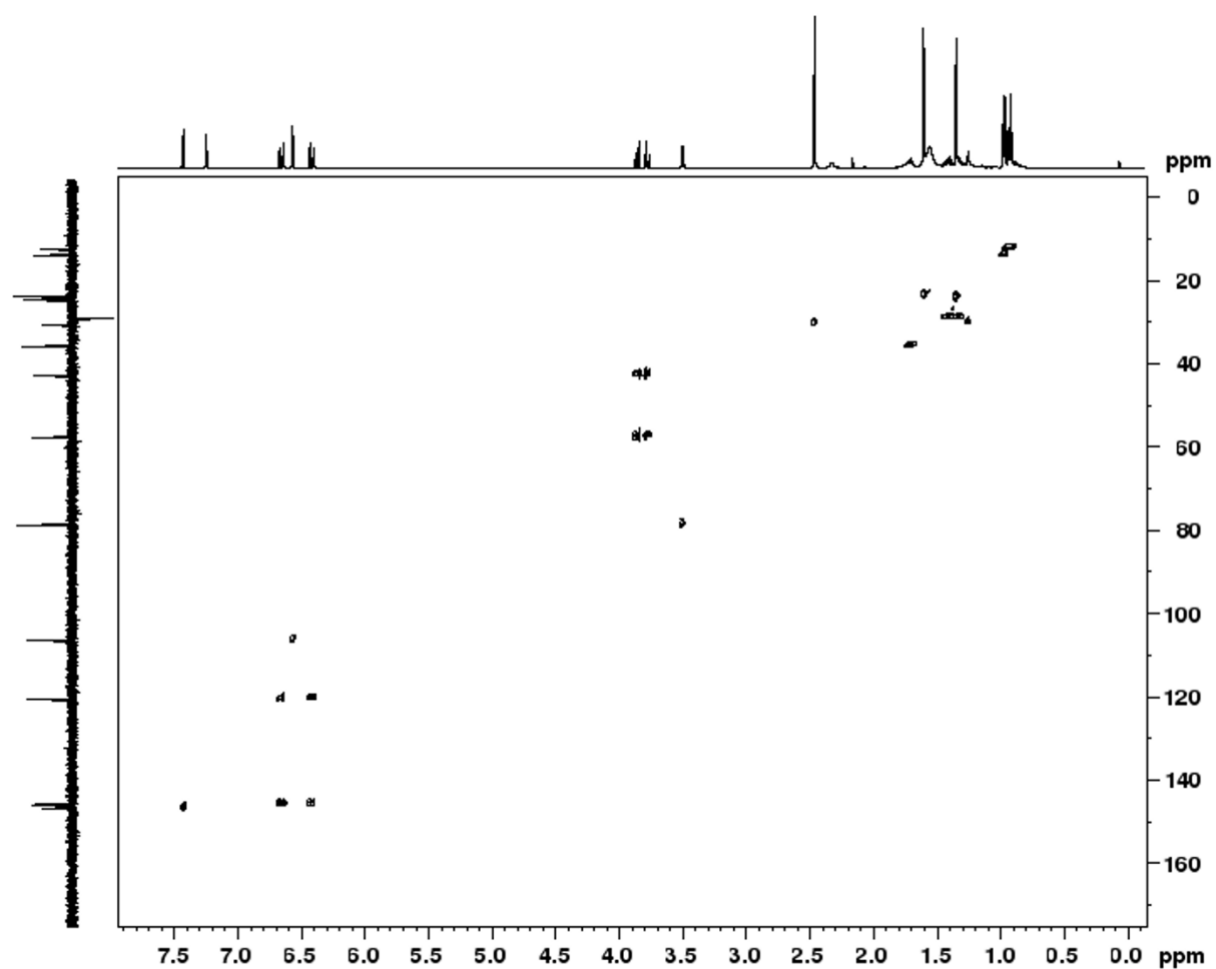

Figure S101: HMBC NMR spectrum (CDCl<sub>3</sub>) of compound **63**

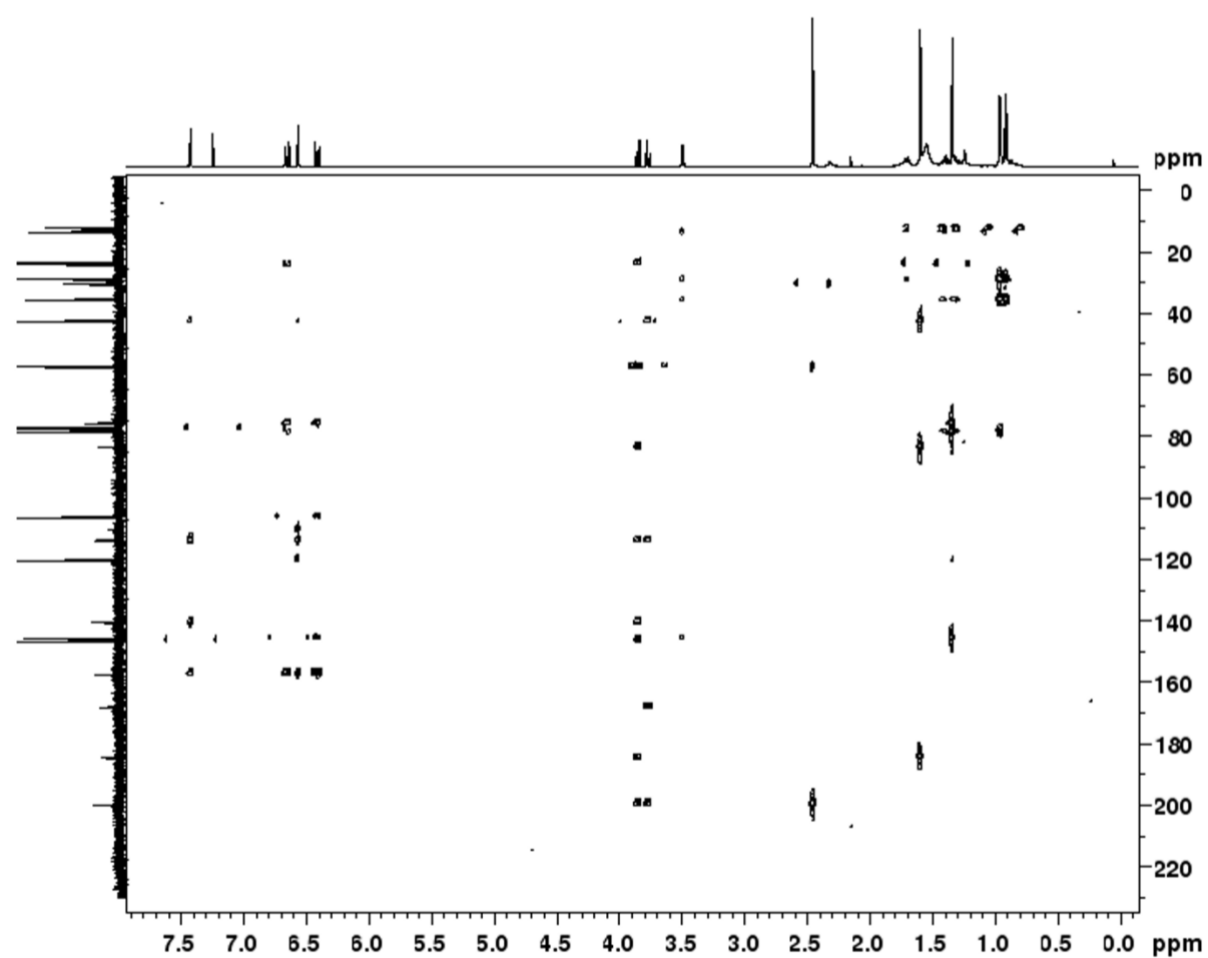

Figure S102: HRMS of compound **63**

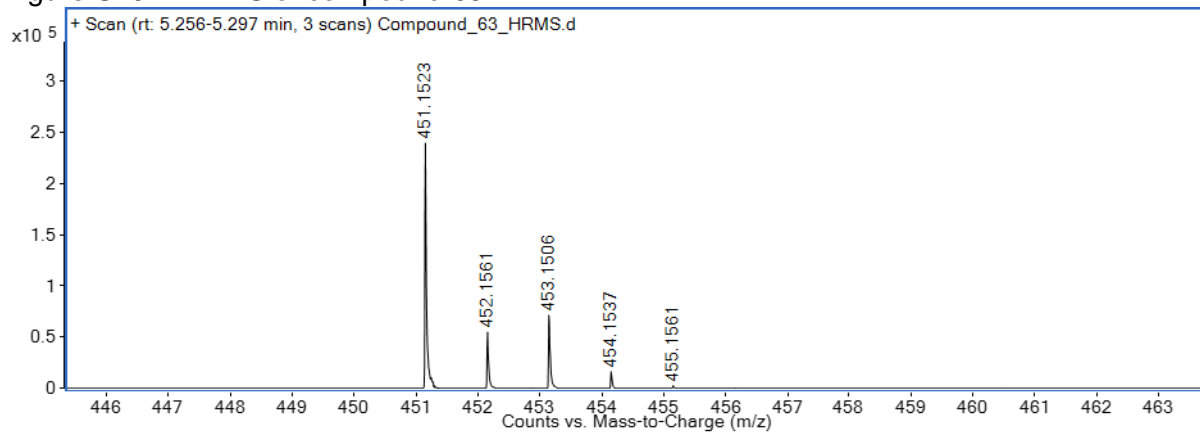

Figure S103:  $^1\text{H}$  NMR spectrum ( $\text{CDCl}_3$ ) of compound **74**

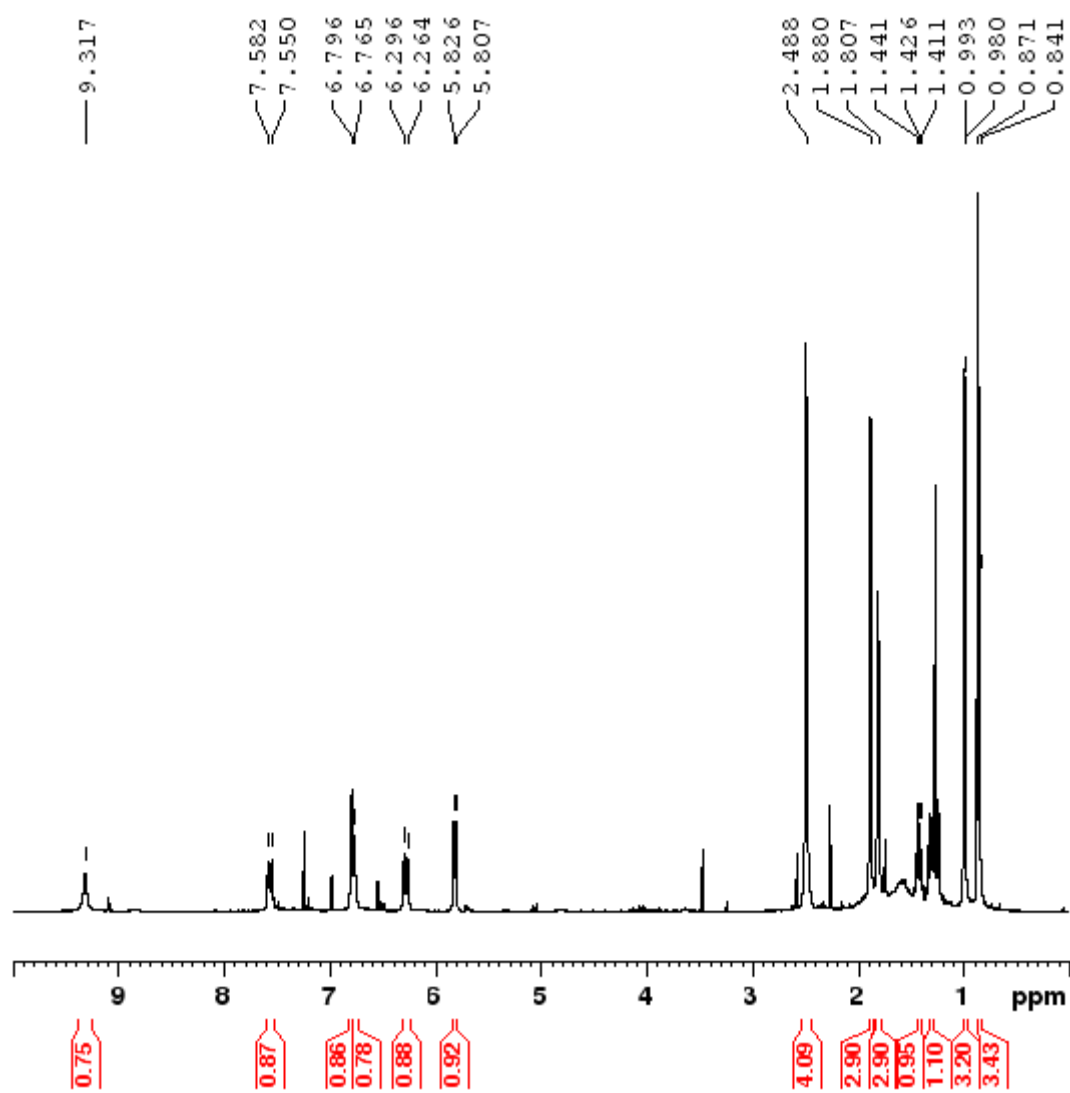



Figure S104:  $^{13}\text{C}$  NMR spectrum ( $\text{CDCl}_3$ ) of compound **74**

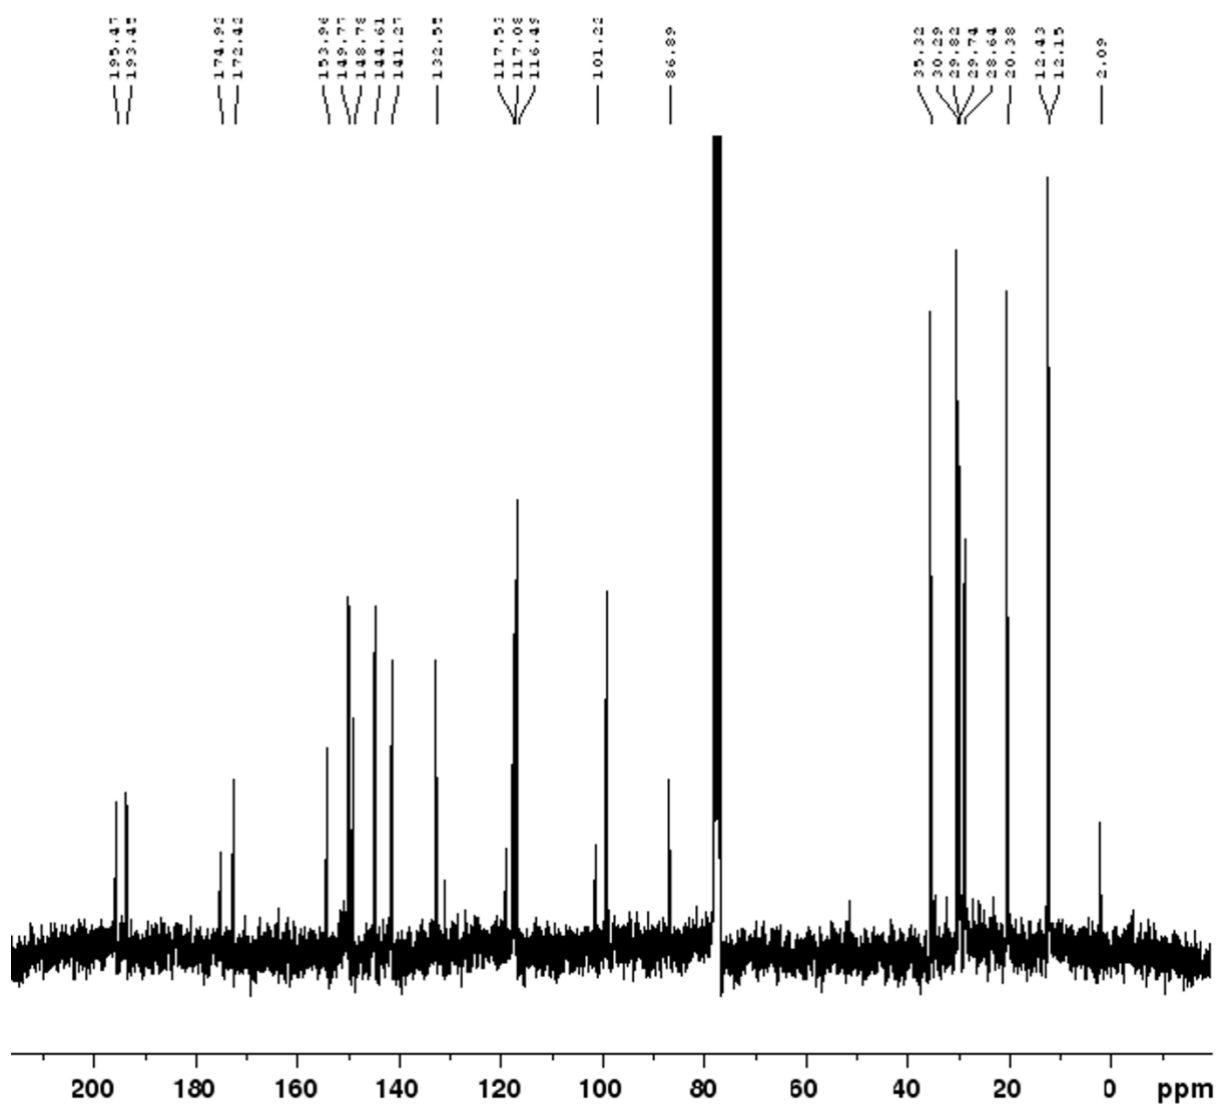

Figure S105: COSY NMR spectrum (CDCl<sub>3</sub>) of compound **74**

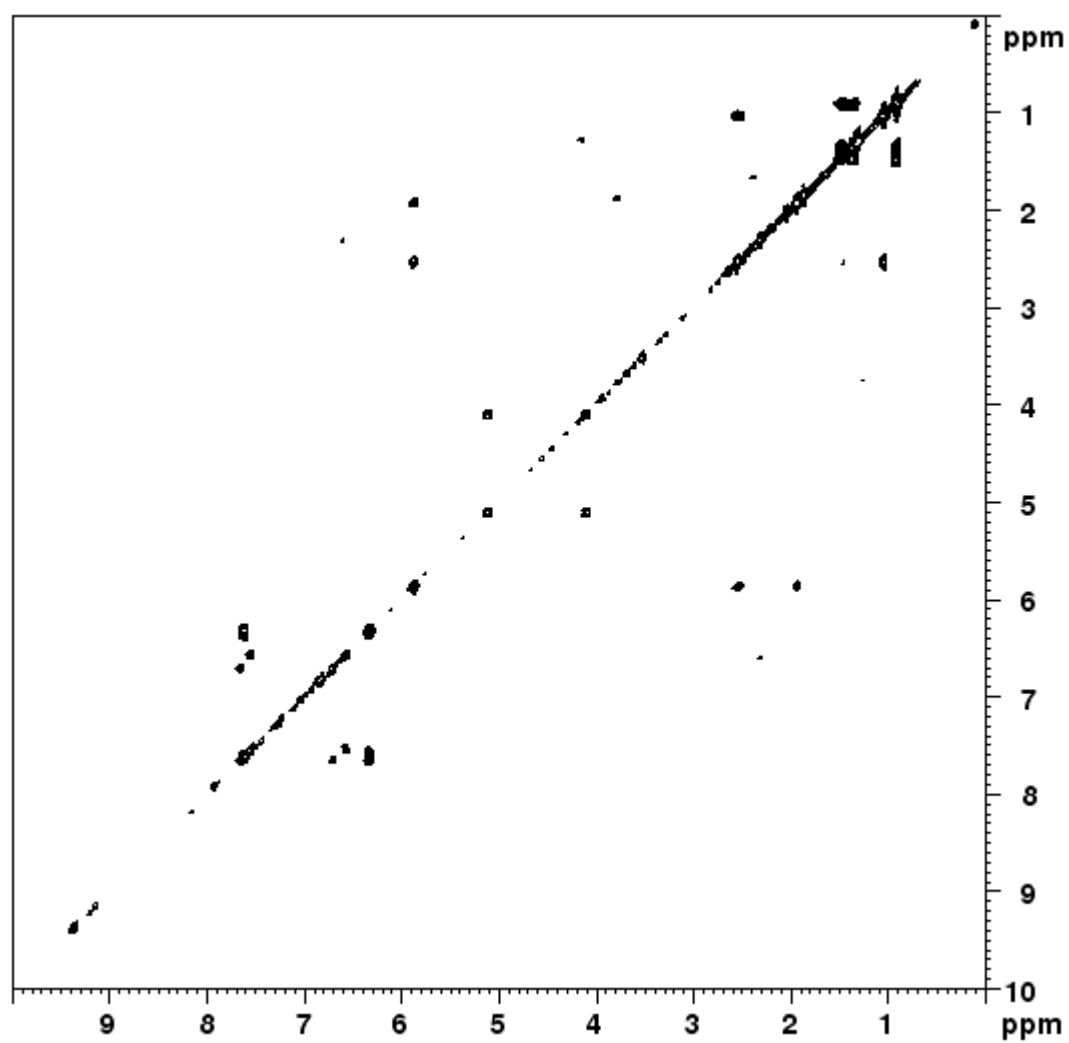

Figure S106: HSQC NMR spectrum (CDCl<sub>3</sub>) of compound **74**

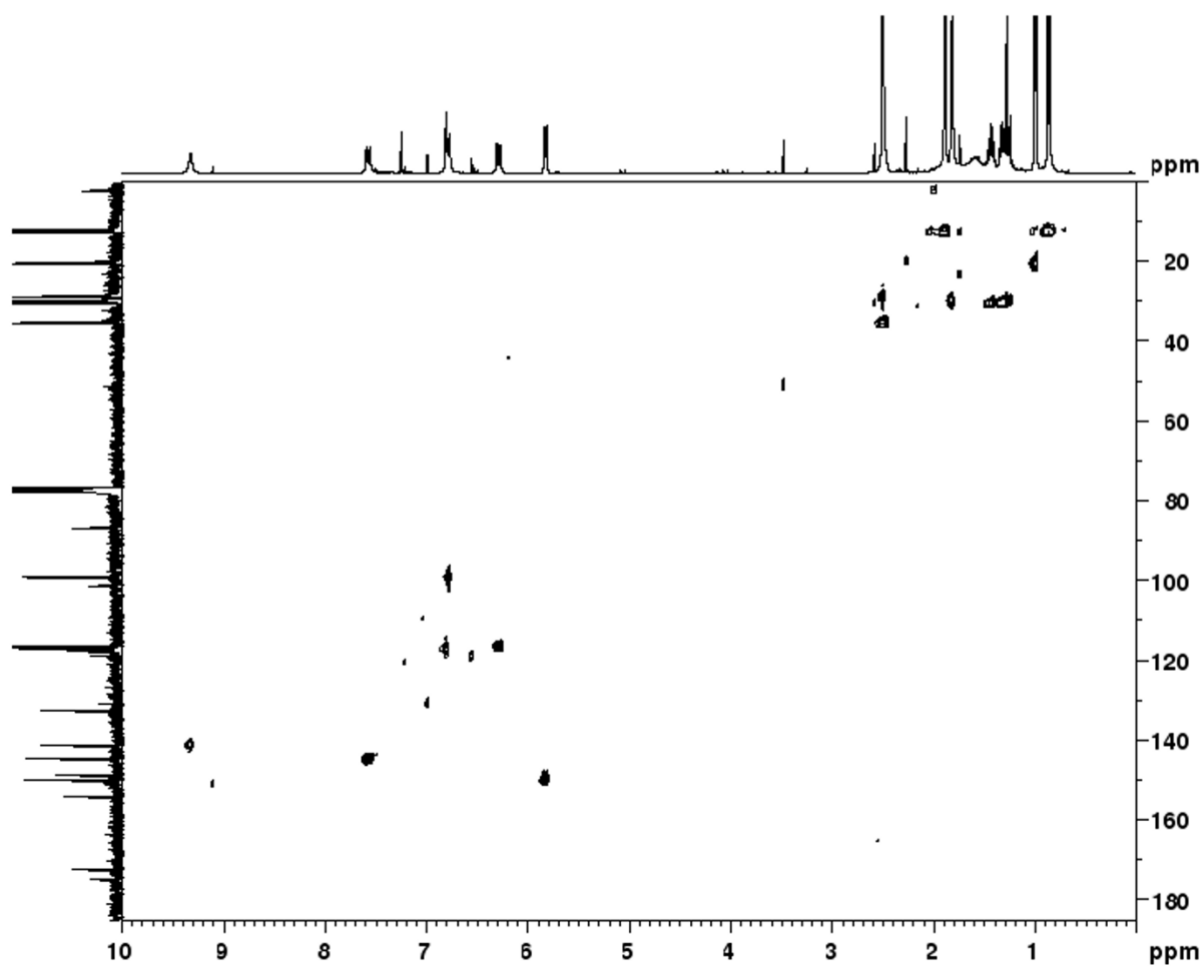

Figure S107: HMBC NMR spectrum (CDCl<sub>3</sub>) of compound **74**

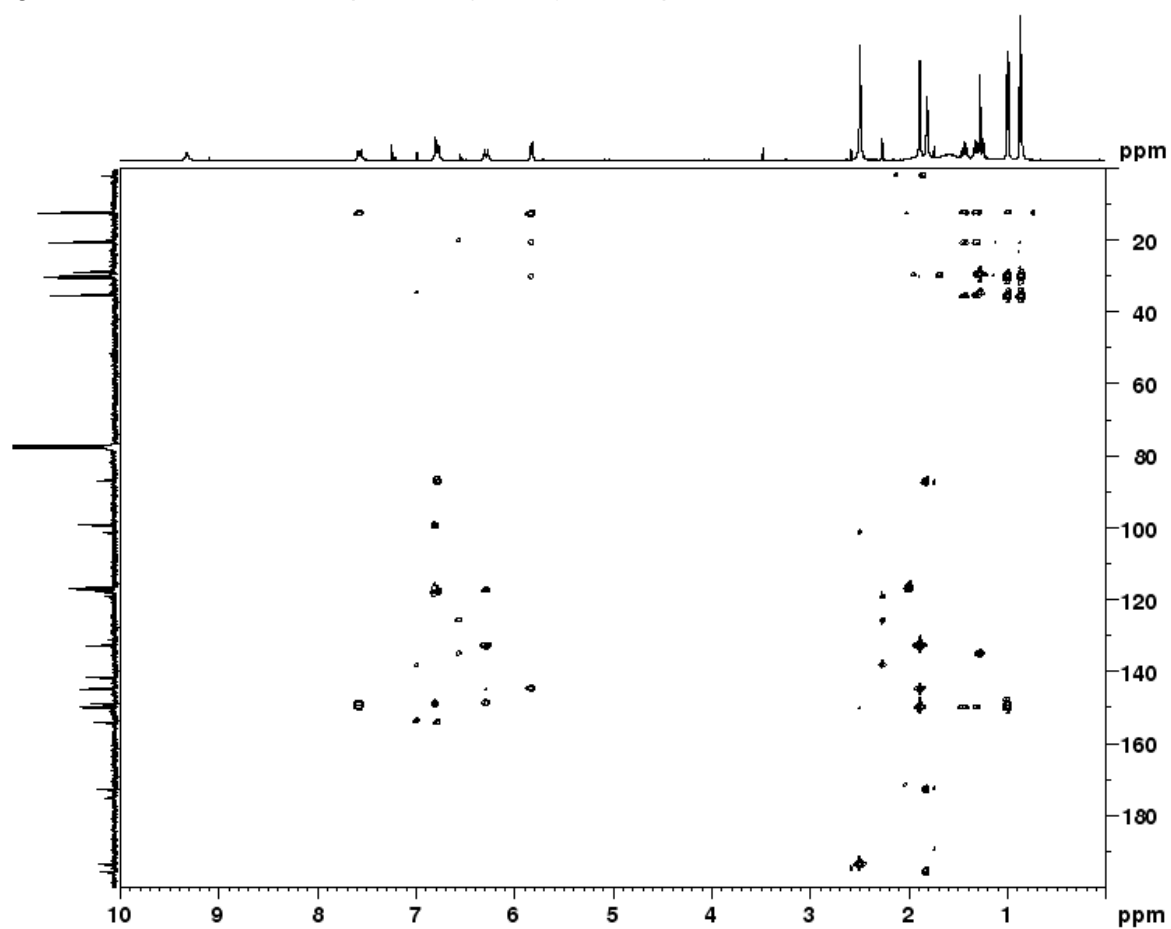

Figure S108: HRMS of compound **74**

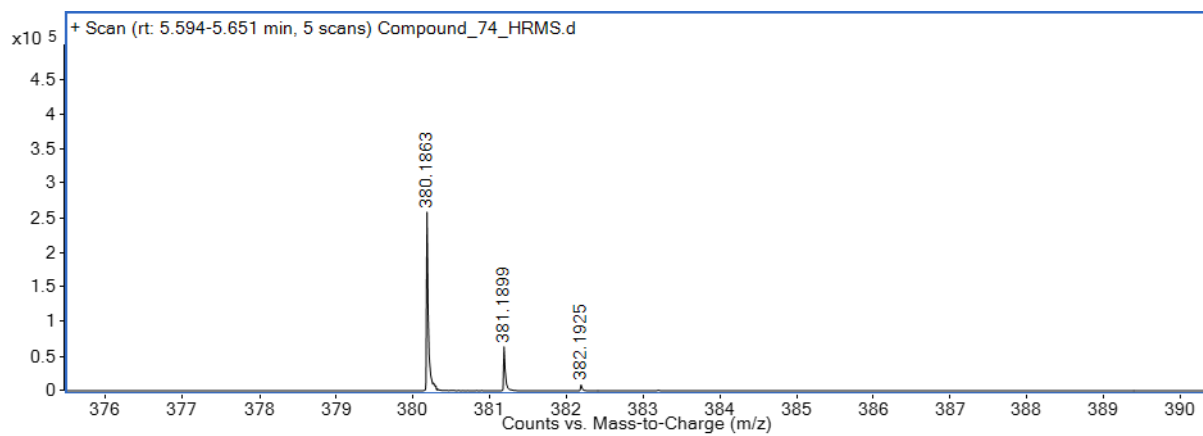

Figure S109: Compound **80** position within t-SNE molecular network

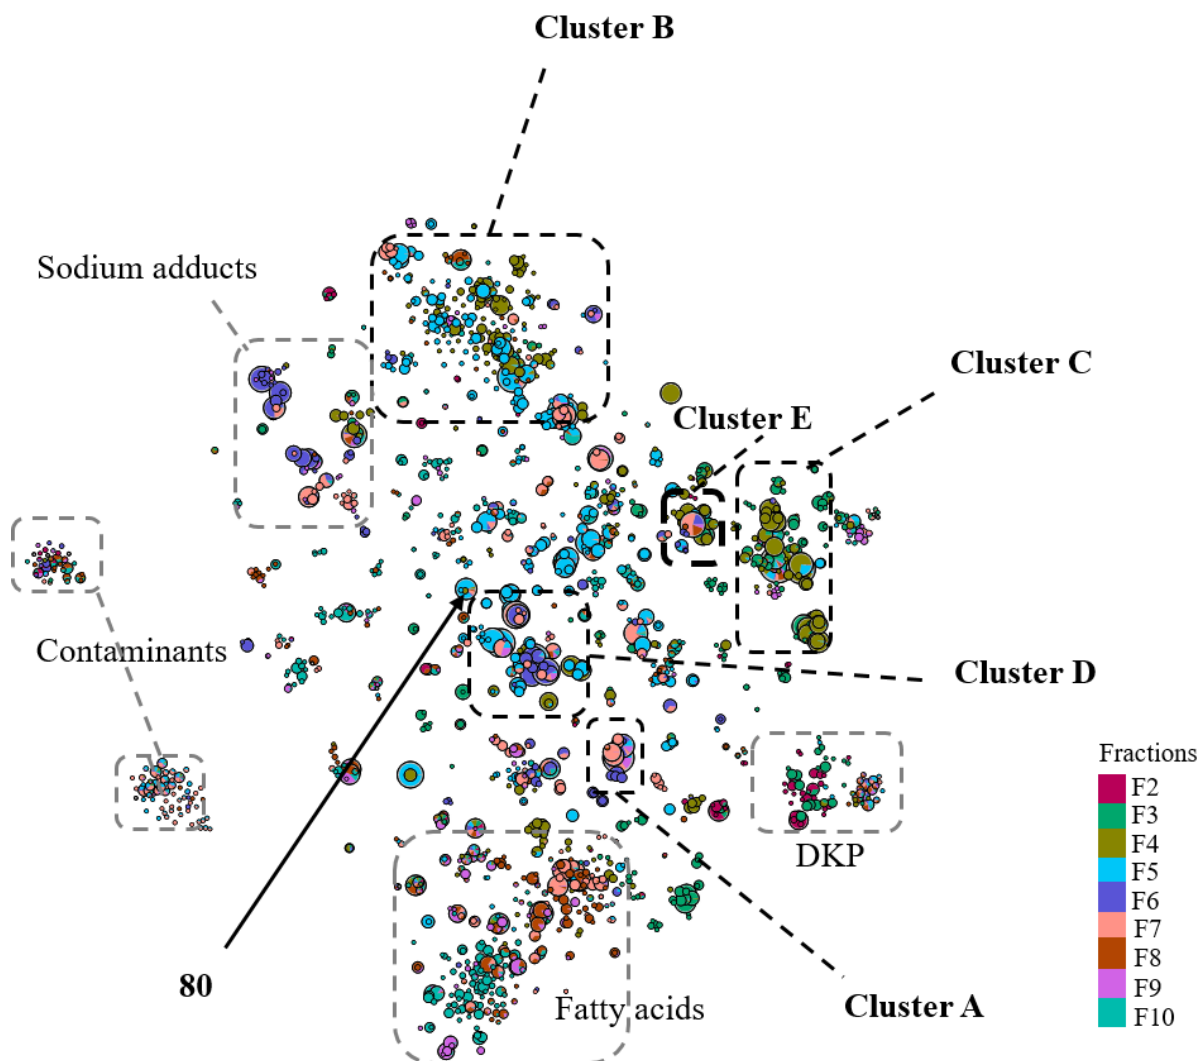

Figure S110: MS/MS information of compound **80** ( $m/z$  392.1628, 1.3 ppm, level 0) from molecular network. (a) MS/MS spectrum of compound **80**, (b) the mirror plot of MS/MS spectra from compound **80** against **5** with common neutral loss from CO and OH (c) common fragment and neutral loss with their contribution to cosine score.

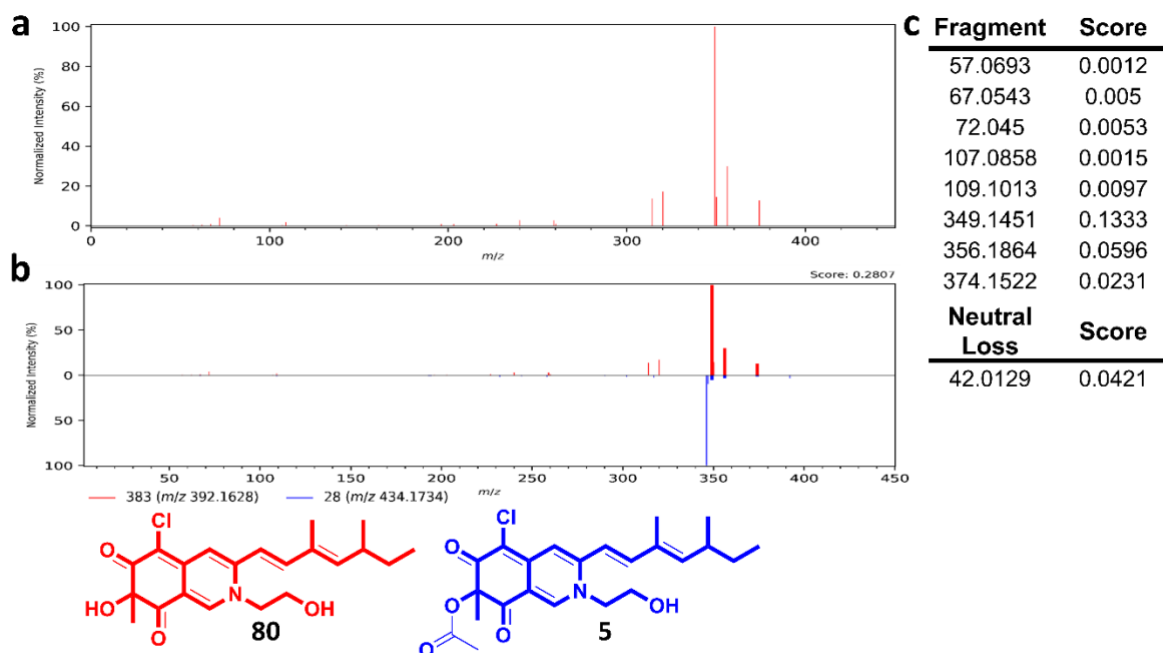

Figure S111:  $^1\text{H}$  NMR spectrum (DMF- $d_6$ ) of compound **80**

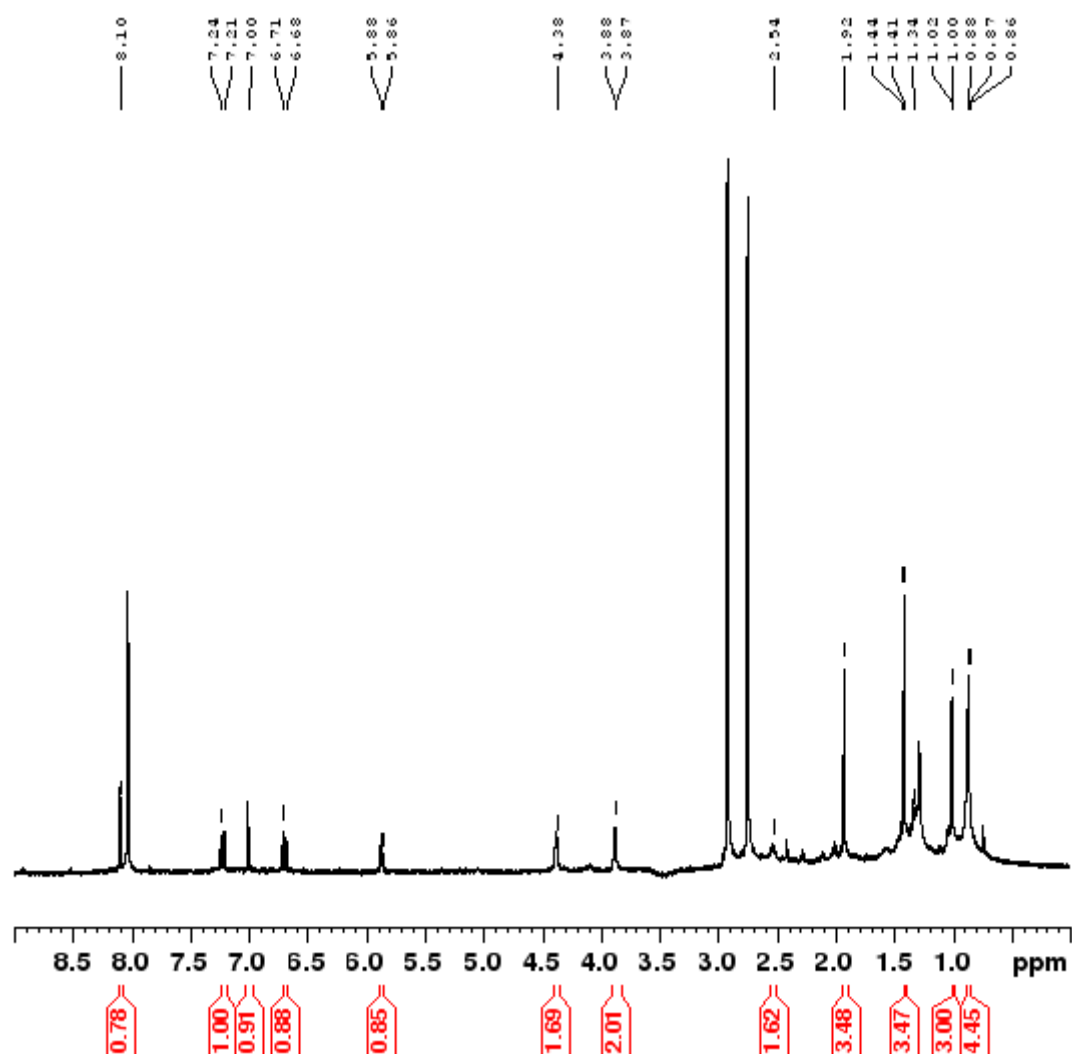



Figure S112:  $^{13}\text{C}$  NMR spectrum (DMF- $d_6$ ) of compound **80**

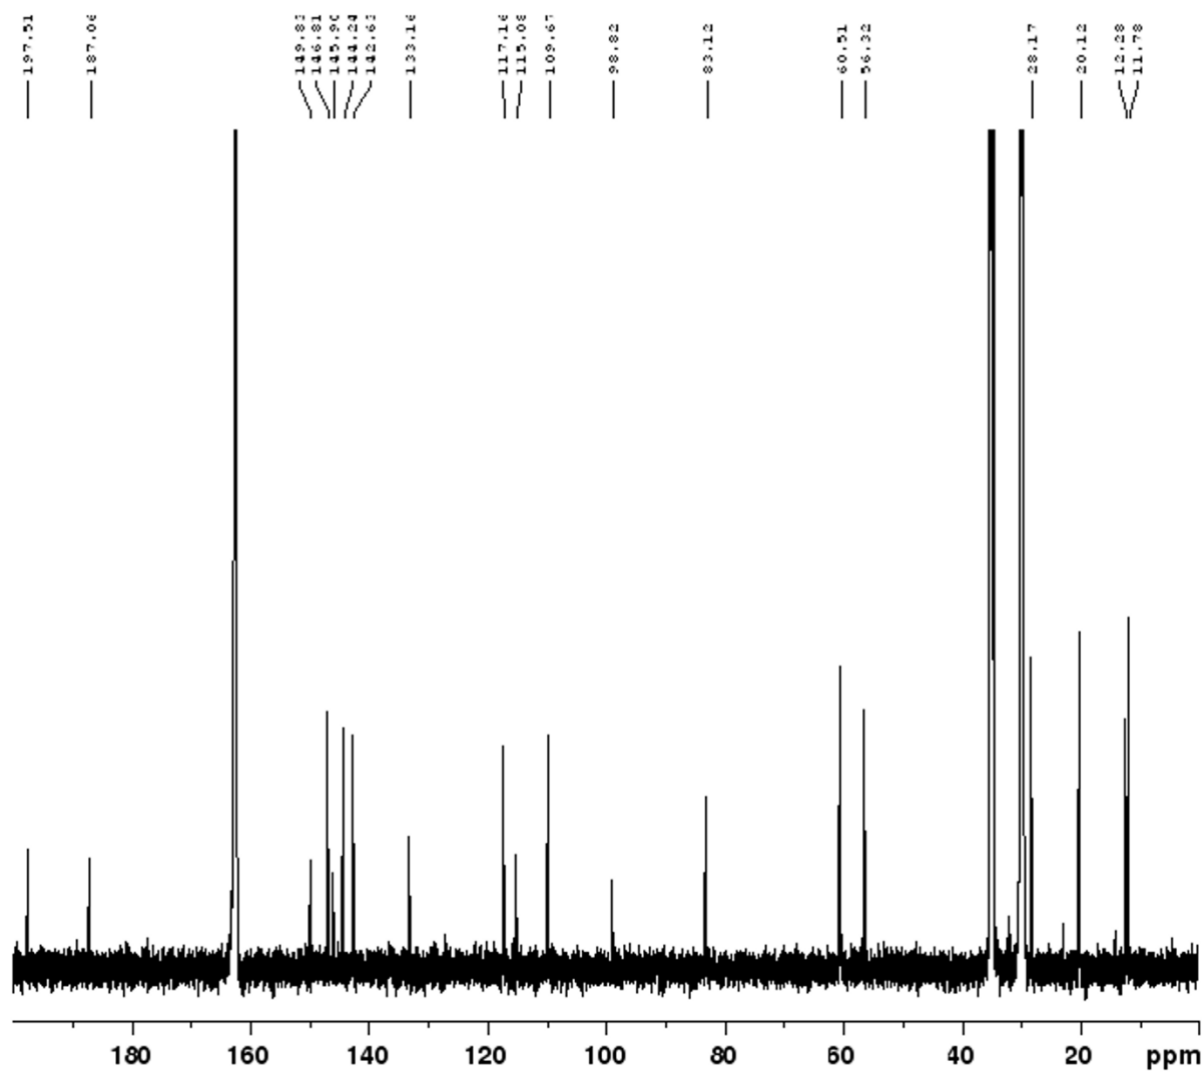

Figure S113: COSY NMR spectrum (DMF-*d*<sub>6</sub>) of compound **80**

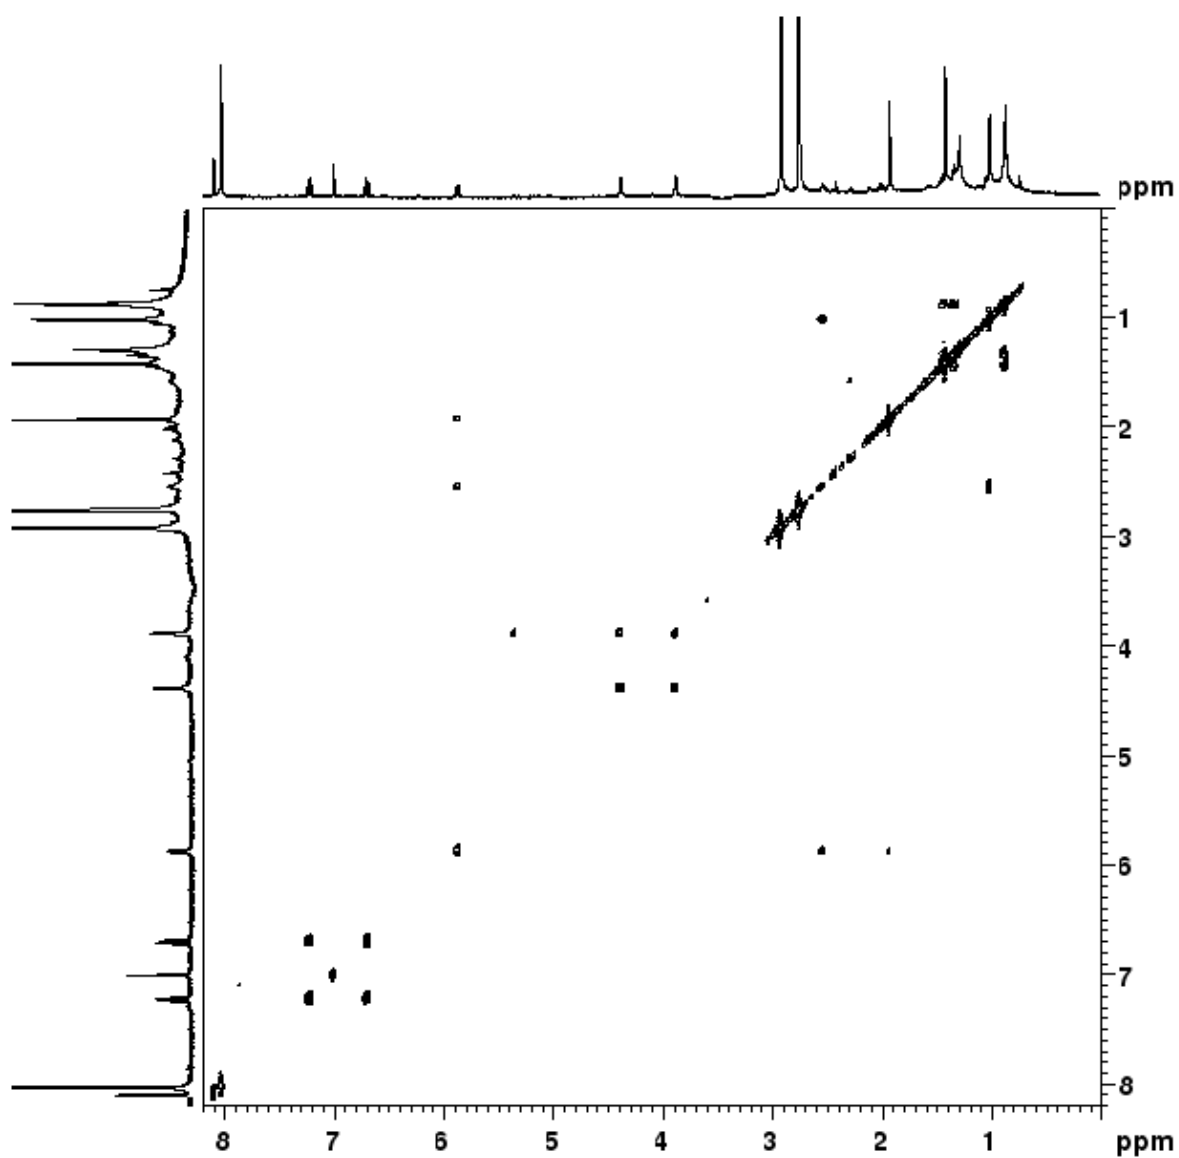

Figure S114: HSQC NMR spectrum (DMF-*d*<sub>6</sub>) of compound **80**

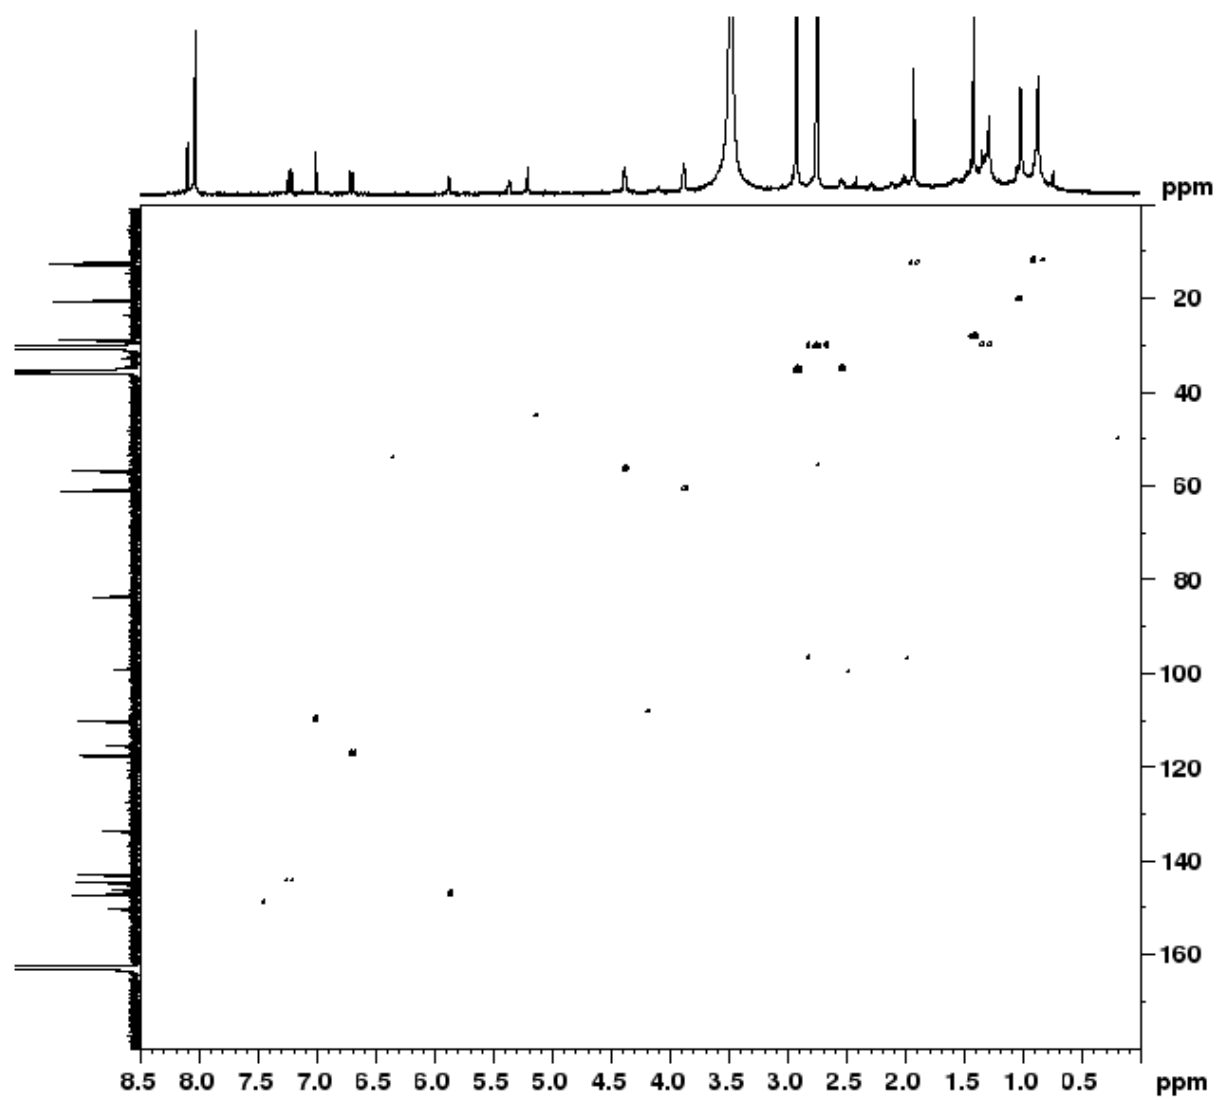

Figure S115: HMBC NMR spectrum (DMF-d6) of compound **80**

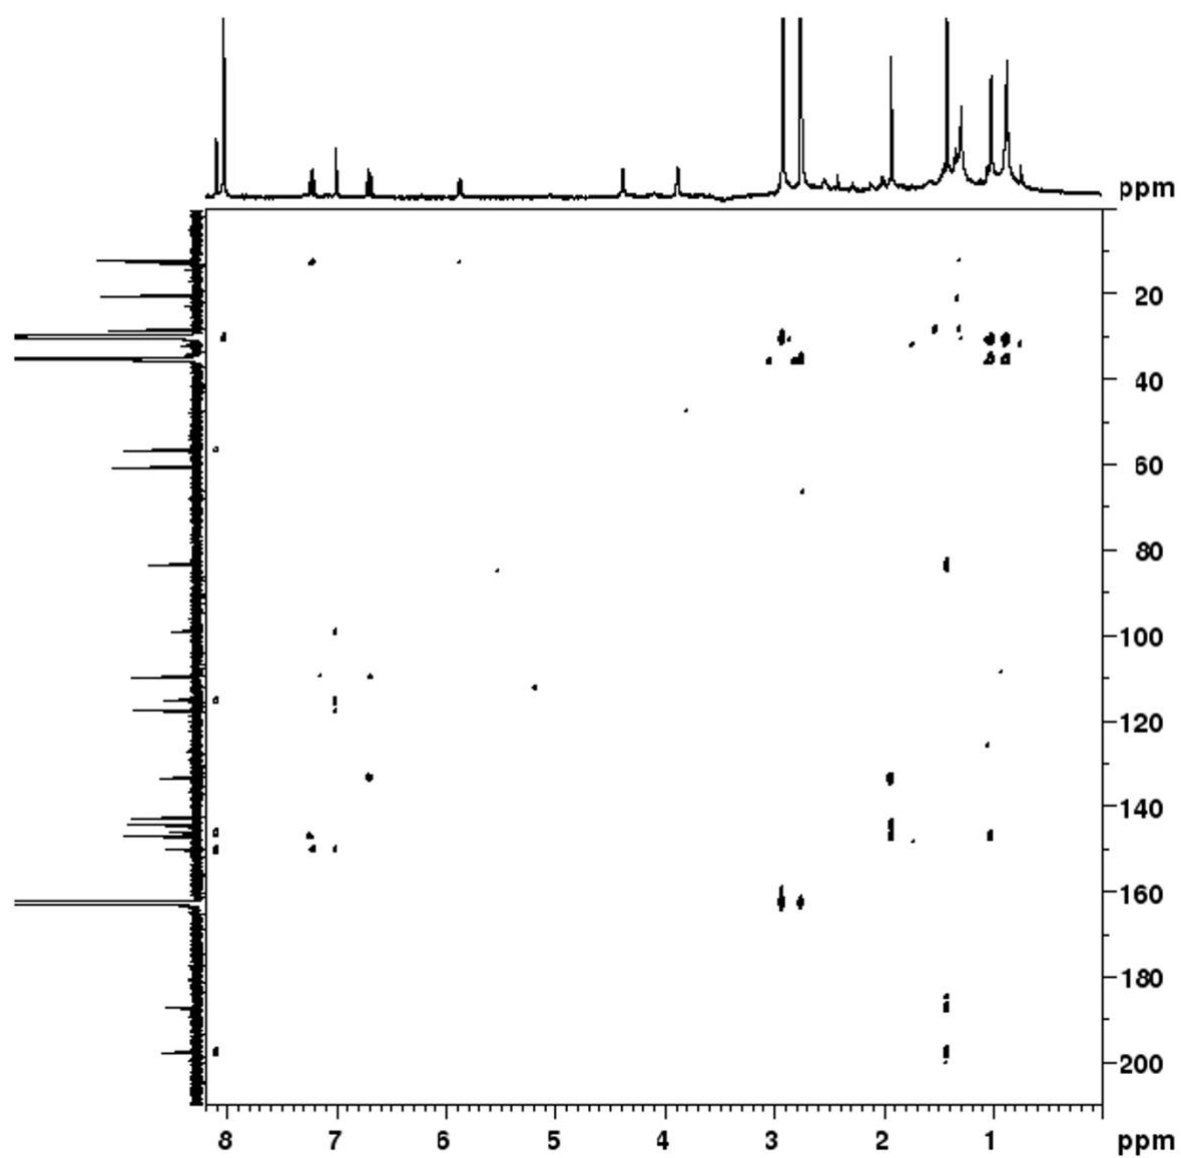

Figure S116: HRMS of compound **80**

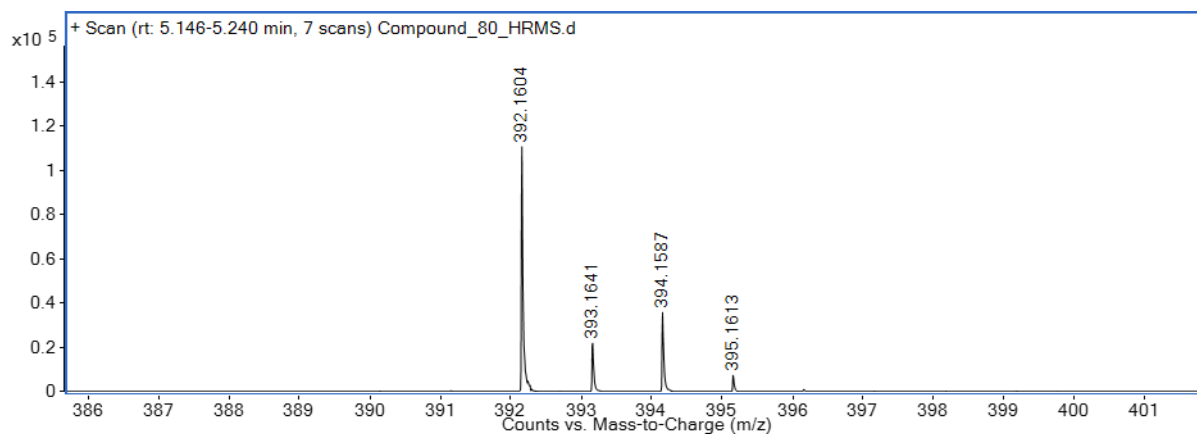

FigS117: Structural elucidation of isolated azaphilones, (a) COSY (in bod) and HMBC (arrow) correlation of compounds **63**, **74** and **80**

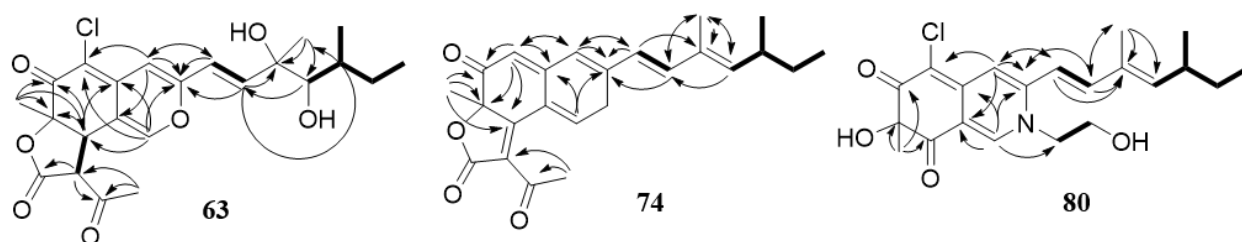

Figure S118: UV spectra in acetonitrile of isolated azaphilones **1**, **2**, **5**, **23**, **63**, **74**, **75** and **80**

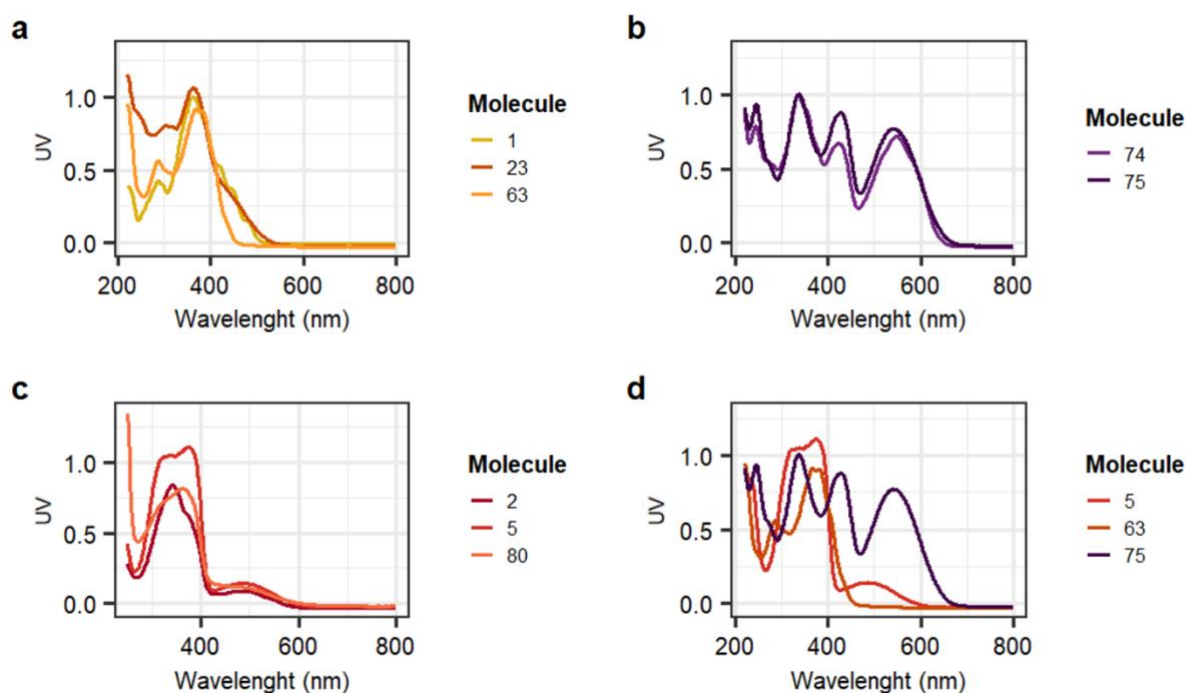

Figure S119: UV spectra in methanol of isolated azaphilones **1**, **2**, **5**, **23**, **63**, **74**, **75** and **80**

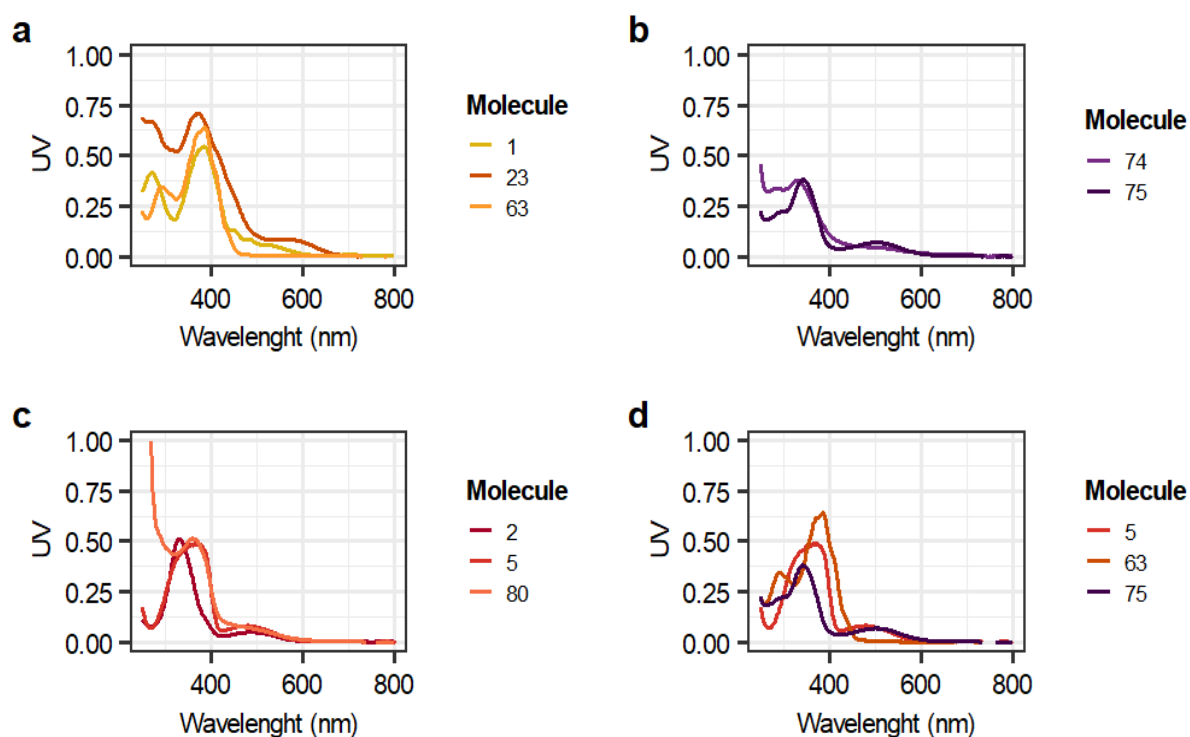

Figure S120: CD spectra of isolated azaphilones **2**, **5**, **23**, **63**, **74**, **75** and **80**

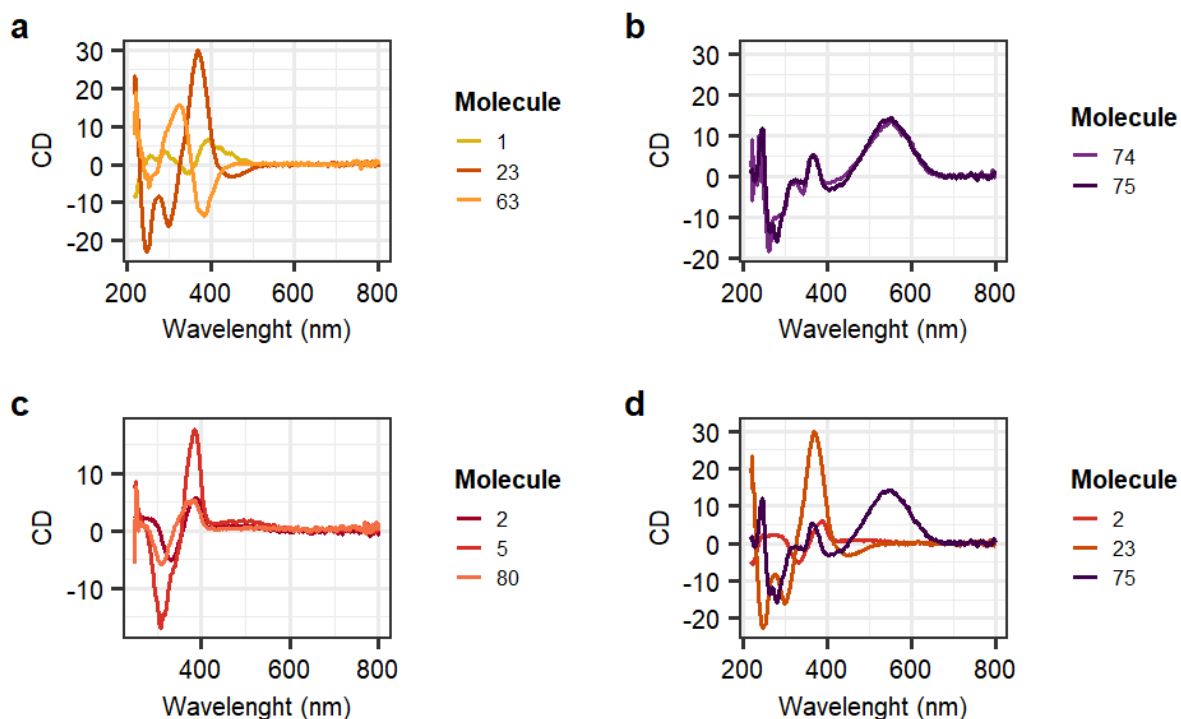

Figure S121: Absolute configuration of compound **1** and **5** based on (a) ORTEP drawing of compounds **1** and **5** with thermal ellipsoids drawn at the 50% probability level. Only the major disorder fragments are shown and for clarity and (b) compound **1** and **5** structure with asymmetric centers.

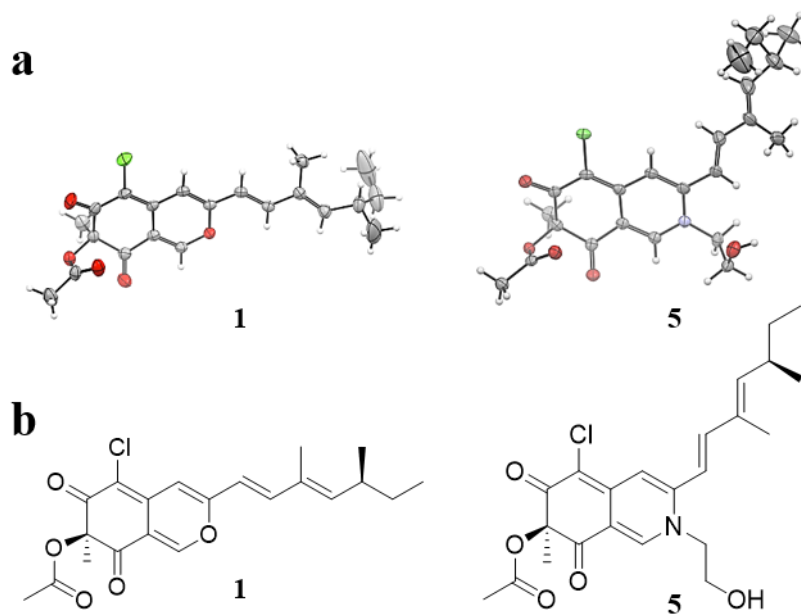

Table S3: Crystal data and structure refinement

| Identification code                                            |                 | Compound 1                                                        | Compound 5                                                        |
|----------------------------------------------------------------|-----------------|-------------------------------------------------------------------|-------------------------------------------------------------------|
| <i>A. Crystal Data</i>                                         |                 |                                                                   |                                                                   |
| Empirical Formula                                              |                 | C <sub>21</sub> H <sub>23</sub> ClO <sub>5</sub>                  | C <sub>23</sub> H <sub>27</sub> ClNO <sub>5</sub>                 |
| Formula Weight                                                 |                 | 390.84                                                            | 432.90                                                            |
| Crystal Color, Habit                                           |                 | [clear light orange, prism]                                       | [clear light orange, prism]                                       |
| Crystal Dimensions (mm <sup>3</sup> )                          |                 | 0.350 × 0.02 × 0.02                                               | 0.500 × 0.075 × 0.05                                              |
| Crystal System                                                 |                 | orthorhombic                                                      | orthorhombic                                                      |
| Space Group                                                    |                 | <i>P</i> 2 <sub>1</sub> 2 <sub>1</sub> 2 <sub>1</sub>             | <i>P</i> 2 <sub>1</sub> 2 <sub>1</sub> 2 <sub>1</sub>             |
| Unit cell dimensions                                           | <i>a</i> (Å)    | 7.1822 (3)                                                        | 6.6642 (2)                                                        |
|                                                                | <i>b</i> (Å)    | 16.6035 (6)                                                       | 8.5313 (2)                                                        |
|                                                                | <i>c</i> (Å)    | 34.6011 (13)                                                      | 39.7195 (11)                                                      |
|                                                                | $\alpha$ (°)    | 90                                                                | 90                                                                |
|                                                                | $\beta$ (°)     | 90                                                                | 90                                                                |
|                                                                | $\gamma$ (°)    | 90                                                                | 90                                                                |
| Volume (Å <sup>3</sup> )                                       |                 | 4126.2 (3)                                                        | 2258.22 (11)                                                      |
| Z value                                                        |                 | 8                                                                 | 4                                                                 |
| Calculated density<br>D <sub>calc.</sub> (g.cm <sup>-3</sup> ) |                 | 1.258                                                             | 1.273                                                             |
| Absorption coefficient $\mu$ (mm <sup>-1</sup> )               |                 | 0.213                                                             | 0.202                                                             |
| F (000)                                                        |                 | 1648.0                                                            | 916.0                                                             |
| <i>B. Intensity Measurements</i>                               |                 |                                                                   |                                                                   |
| Diffractometer                                                 |                 | Rigaku XtaLAB PRO                                                 |                                                                   |
| Radiation type                                                 |                 | Mo K $\alpha$                                                     |                                                                   |
| Wavelength (Å)                                                 |                 | 0.71073                                                           |                                                                   |
| Voltage, Current (kV, mA)                                      |                 | (50, 0.6)                                                         |                                                                   |
| <i>T</i> (K)                                                   |                 | 153 (10)                                                          | 175 (10)                                                          |
| 2 $\theta$ range for data collection (°)                       |                 | 6.614 to 51.362                                                   | 6.846 to 51.356                                                   |
| Limiting indices                                               |                 | -8 ≤ <i>h</i> ≤ 8,<br>-20 ≤ <i>k</i> ≤ 17,<br>-42 ≤ <i>l</i> ≤ 42 | -8 ≤ <i>h</i> ≤ 8,<br>-10 ≤ <i>k</i> ≤ 10,<br>-48 ≤ <i>l</i> ≤ 47 |
| Reflections collected/unique                                   |                 | 39852/7808                                                        | 19887/4177                                                        |
| Completeness to $\theta$ full (%)                              |                 | 99.7                                                              | 96.7                                                              |
| <i>C. Structure Solution and Refinement</i>                    |                 |                                                                   |                                                                   |
| R <sub>int</sub>                                               |                 | 0.0699                                                            | 0.0361                                                            |
| Absorption correction                                          |                 | Semi-empirical from equivalents                                   |                                                                   |
| Refinement method                                              |                 | Full-matrix least-squares on F <sup>2</sup>                       |                                                                   |
| Data/restraints/parameters                                     |                 | 7808/0/539                                                        | 4177/0/328                                                        |
| Goodness-of-fit on F <sup>2</sup>                              |                 | 1.033                                                             | 1.065                                                             |
| Final R indices<br>[ <i>I</i> > 2 $\sigma$ ( <i>I</i> )]       | R <sub>1</sub>  | 0.0424                                                            | 0.0336                                                            |
|                                                                | wR <sub>2</sub> | 0.0851                                                            | 0.0805                                                            |
| R indices<br>(all data)                                        | R <sub>1</sub>  | 0.0644                                                            | 0.0345                                                            |
|                                                                | wR <sub>2</sub> | 0.0910                                                            | 0.0810                                                            |
| Absolute structure parameters                                  |                 |                                                                   |                                                                   |
| Flack Parameter                                                |                 | 0.03 (3)                                                          | -0.007(19)                                                        |
| Hooft Parameter                                                |                 | 0.04 (3)                                                          | 0.002 (17)                                                        |
| Largest $\Delta$ peak and hole (e.Å <sup>-3</sup> )            |                 | 0.18/-0.16                                                        | 0.27/-0.22                                                        |
| CCDC Deposit Number                                            |                 | 2085749                                                           | 2085750                                                           |



Table S4: Fractional Atomic Coordinates ( $\times 10^4$ ) and Equivalent Isotropic Displacement Parameters ( $\text{\AA}^2 \times 10^3$ ) for compound **1**.  $U_{eq}$  is defined as 1/3 of the trace of the orthogonalised  $U_{ij}$ .

| Atom | x           | y          | z          | $U_{eq}$ |
|------|-------------|------------|------------|----------|
| Cl1  | 6025.5(11)  | 795.7(5)   | 5808.1(2)  | 35.8(2)  |
| Cl1' | 11014.2(15) | 4548.7(5)  | 6737.2(3)  | 51.8(3)  |
| O1'  | 10323(3)    | 1381.5(11) | 6918.9(6)  | 31.0(5)  |
| O4   | 7183(3)     | 3760.3(12) | 5436.7(6)  | 29.0(5)  |
| O1   | 5364(3)     | 2639.2(12) | 7061.4(6)  | 34.3(5)  |
| O5   | 9700(3)     | 3301.4(13) | 5746.8(6)  | 35.7(5)  |
| O4'  | 10687(3)    | 3898.6(12) | 8183.5(6)  | 35.7(5)  |
| O2   | 6970(3)     | 2143.4(14) | 5288.3(6)  | 40.6(6)  |
| O5'  | 13445(3)    | 3563.9(14) | 7925.4(7)  | 45.1(6)  |
| O3'  | 10225(4)    | 2304.3(14) | 8031.8(7)  | 50.2(6)  |
| O3   | 6721(3)     | 4213.6(14) | 6180.0(6)  | 45.8(6)  |
| O2'  | 10929(4)    | 4920.0(13) | 7570.3(7)  | 52.8(6)  |
| C4A' | 10490(4)    | 3064.4(17) | 7040.5(9)  | 26.1(7)  |
| C4A  | 5807(4)     | 2059.2(17) | 6295.1(9)  | 25.5(7)  |
| C8A' | 10255(4)    | 2491.2(17) | 7353.7(9)  | 27.4(7)  |
| C8A  | 5904(4)     | 2909.9(17) | 6394.6(8)  | 26.4(6)  |
| C3   | 5300(4)     | 1819.3(17) | 6983.1(9)  | 28.0(7)  |
| C9   | 5023(4)     | 1341.9(18) | 7325.4(9)  | 31.2(7)  |
| C4   | 5502(4)     | 1542.6(18) | 6621.0(9)  | 29.2(7)  |
| C19  | 9031(4)     | 3748.3(18) | 5510.4(8)  | 27.5(7)  |
| C6   | 6479(4)     | 2359.7(19) | 5607.1(9)  | 28.0(7)  |
| C5   | 6068(4)     | 1813.1(17) | 5923.5(8)  | 27.3(7)  |
| C1'  | 10181(4)    | 1698.9(18) | 7277.7(9)  | 29.6(7)  |
| C20  | 10047(4)    | 4340.4(19) | 5267.9(9)  | 35.1(7)  |
| C11' | 10969(4)    | 308.4(18)  | 5816.2(9)  | 31.6(7)  |
| C10' | 10760(4)    | 701.1(18)  | 6188.2(8)  | 28.7(7)  |
| C19' | 12563(4)    | 3812.4(19) | 8195.1(10) | 36.4(8)  |
| C1   | 5683(4)     | 3141.9(18) | 6762.7(9)  | 32.7(7)  |
| C4'  | 10611(4)    | 2709.8(17) | 6664.3(9)  | 28.5(7)  |
| C3'  | 10537(4)    | 1901.2(17) | 6612.1(9)  | 27.2(7)  |
| C8   | 6311(4)     | 3523.1(17) | 6099.6(9)  | 29.3(7)  |
| C5'  | 10619(4)    | 3873.5(17) | 7112.9(9)  | 33.0(7)  |
| C8'  | 10160(4)    | 2756.7(18) | 7759.1(9)  | 32.4(7)  |
| C9'  | 10695(4)    | 1504.8(18) | 6244.9(9)  | 29.2(7)  |
| C6'  | 10559(4)    | 4215(2)    | 7497.0(10) | 36.1(8)  |
| C10  | 4923(5)     | 1638.9(19) | 7683.7(9)  | 34.1(7)  |
| C7   | 6085(4)     | 3258.6(18) | 5683.6(8)  | 29.1(7)  |
| C11  | 4664(5)     | 1171.1(19) | 8030.4(9)  | 38.6(8)  |
| C12' | 11143(5)    | -499.4(19) | 5808.1(10) | 38.2(8)  |
| C7'  | 9862(4)     | 3664.6(18) | 7823.2(9)  | 30.9(7)  |
| C17' | 11034(5)    | 834(2)     | 5463.4(9)  | 40.4(8)  |
| C18  | 4062(4)     | 3421(2)    | 5567.4(10) | 43.9(9)  |
| C13' | 11486(5)    | -1035(2)   | 5466.1(11) | 49.6(10) |
| C18' | 7772(4)     | 3805(2)    | 7872.6(11) | 47.1(9)  |
| C20' | 13323(5)    | 4027(2)    | 8583.9(11) | 55.3(10) |
| C12  | 4819(8)     | 1529(2)    | 8373.2(11) | 70.4(13) |
| C14' | 9805(8)     | -1547(3)   | 5368.3(15) | 85.1(16) |
| C16' | 13198(8)    | -1559(4)   | 5552.8(18) | 116(2)   |
| C15' | 8200(8)     | -1074(6)   | 5217(2)    | 157(4)   |
| C17  | 4204(6)     | 293.3(19)  | 7981.5(10) | 49.8(10) |
| C13A | 5170(20)    | 1140(9)    | 8777(5)    | 53(4)    |
| C16A | 7216(19)    | 1248(9)    | 8937(5)    | 79(4)    |
| C14A | 3820(20)    | 1499(9)    | 9048(4)    | 66(4)    |
| C15A | 1816(18)    | 1353(8)    | 8936(3)    | 81(3)    |

| Atom | x        | y        | z       | U <sub>(eq)</sub> |
|------|----------|----------|---------|-------------------|
| C15B | 2260(20) | 1301(6)  | 9360(3) | 99(4)             |
| C13B | 4130(20) | 1187(10) | 8751(5) | 58(4)             |
| C16B | 6030(30) | 1031(11) | 8952(6) | 98(7)             |
| C14B | 2910(20) | 1712(9)  | 8989(4) | 61(4)             |

Table S5: Anisotropic Displacement Parameters ( $\times 10^4$ ) for compound **1**. The anisotropic displacement factor exponent takes the form:  $-2\pi^2[h^2a^{*2} \times U_{11} + 2hka^* \times b^* \times U_{12} + \dots]$ .

| Atom | U <sub>11</sub> | U <sub>22</sub> | U <sub>33</sub> | U <sub>23</sub> | U <sub>13</sub> | U <sub>12</sub> |
|------|-----------------|-----------------|-----------------|-----------------|-----------------|-----------------|
| Cl1  | 45.9(4)         | 29.5(4)         | 32.0(4)         | -6.1(3)         | -0.6(4)         | -2.4(4)         |
| Cl1' | 79.9(6)         | 27.6(4)         | 48.0(5)         | 9.5(4)          | 2.0(5)          | -3.3(4)         |
| O1'  | 41.8(12)        | 23.7(11)        | 27.3(12)        | 1.5(9)          | 0.1(9)          | -2.6(9)         |
| O4   | 24.9(10)        | 34.1(12)        | 28.0(12)        | 8.3(9)          | -1.4(9)         | 2.1(9)          |
| O1   | 52.1(13)        | 25.0(11)        | 25.8(12)        | 0.0(9)          | 6.1(10)         | 1.6(10)         |
| O5   | 28.2(11)        | 43.5(13)        | 35.3(13)        | 12.4(11)        | -3.7(10)        | 3.6(10)         |
| O4'  | 32.4(12)        | 37.7(12)        | 37.0(13)        | -9.5(10)        | -0.2(10)        | 1.4(9)          |
| O2   | 54.7(13)        | 42.6(14)        | 24.7(13)        | -3.0(11)        | 5.1(11)         | -3.4(11)        |
| O5'  | 32.8(12)        | 53.2(15)        | 49.3(16)        | -16.0(12)       | 0.3(11)         | 5.3(11)         |
| O3'  | 80.1(17)        | 38.5(13)        | 32.2(14)        | 0.5(12)         | -3.9(13)        | -8.6(13)        |
| O3   | 70.9(16)        | 28.8(13)        | 37.7(14)        | 2.2(11)         | 15.1(12)        | -1.4(12)        |
| O2'  | 76.9(17)        | 25.7(13)        | 55.8(16)        | -7.8(11)        | 2.1(14)         | 0.2(13)         |
| C4A' | 21.7(15)        | 24.5(15)        | 32.2(18)        | 3.4(13)         | -1.9(13)        | 1.5(12)         |
| C4A  | 20.0(14)        | 27.0(15)        | 29.6(17)        | 0.5(13)         | -0.8(13)        | 0.7(12)         |
| C8A' | 25.3(15)        | 26.9(16)        | 30.1(17)        | 2.3(13)         | -1.7(14)        | -1.1(12)        |
| C8A  | 25.0(14)        | 28.3(15)        | 25.9(17)        | -0.1(13)        | 2.2(13)         | 0.5(13)         |
| C3   | 29.2(16)        | 23.1(16)        | 31.7(18)        | 0.4(14)         | -1.0(14)        | 1.7(12)         |
| C9   | 35.2(15)        | 27.3(16)        | 31.1(19)        | 3.8(14)         | 3.0(15)         | -0.4(14)        |
| C4   | 31.7(16)        | 24.5(15)        | 31.6(18)        | -1.7(14)        | -2.1(13)        | -1.8(13)        |
| C19  | 25.7(15)        | 30.3(16)        | 26.6(17)        | -1.0(14)        | -0.5(14)        | 5.4(14)         |
| C6   | 22.8(15)        | 36.1(17)        | 25.0(18)        | -0.8(14)        | -1.7(13)        | 1.2(13)         |
| C5   | 25.3(15)        | 28.4(16)        | 28.2(17)        | -3.6(13)        | -1.8(14)        | -0.3(14)        |
| C1'  | 34.0(16)        | 28.3(16)        | 26.6(17)        | 3.2(14)         | -0.8(14)        | -1.1(14)        |
| C20  | 32.2(16)        | 38.6(19)        | 34.5(18)        | 9.4(15)         | 0.6(15)         | -1.1(15)        |
| C11' | 30.3(15)        | 35.4(18)        | 29.1(17)        | -2.5(14)        | -0.3(15)        | -0.2(14)        |
| C10' | 26.3(15)        | 33.2(17)        | 26.5(16)        | 3.8(13)         | 1.5(13)         | -2.2(13)        |
| C19' | 33.1(18)        | 34.0(18)        | 42(2)           | -11.0(16)       | -3.0(16)        | -0.3(14)        |
| C1   | 41.2(18)        | 21.9(15)        | 34.9(19)        | 2.6(14)         | 3.1(15)         | 3.0(13)         |
| C4'  | 28.7(16)        | 27.8(16)        | 29.0(18)        | 5.7(13)         | -2.1(13)        | 0.9(12)         |
| C3'  | 23.9(15)        | 28.3(16)        | 29.4(18)        | 5.2(14)         | -0.3(13)        | -0.5(12)        |
| C8   | 30.0(16)        | 24.1(17)        | 33.9(18)        | 1.9(13)         | 6.0(14)         | 5.6(13)         |
| C5'  | 37.4(18)        | 25.1(16)        | 36.7(19)        | 6.5(14)         | -1.6(15)        | 0.5(13)         |
| C8'  | 33.1(16)        | 30.0(17)        | 34.1(19)        | 2.0(15)         | -3.2(15)        | -4.1(14)        |
| C9'  | 29.1(16)        | 31.2(17)        | 27.1(17)        | 4.6(13)         | -1.7(13)        | 0.5(13)         |
| C6'  | 33.7(18)        | 28.0(17)        | 47(2)           | -2.7(16)        | -1.8(14)        | 8.2(14)         |
| C10  | 44.9(17)        | 25.1(16)        | 32.3(19)        | 3.1(14)         | 6.5(16)         | -1.1(14)        |
| C7   | 25.4(15)        | 34.1(16)        | 27.9(17)        | 5.9(13)         | -0.3(14)        | 3.8(14)         |
| C11  | 59(2)           | 26.7(16)        | 29.6(19)        | 1.4(14)         | 6.3(16)         | 0.8(15)         |
| C12' | 42.9(18)        | 39.0(18)        | 32.7(18)        | -2.0(15)        | 4.9(17)         | 0.3(16)         |
| C7'  | 29.7(15)        | 30.9(16)        | 32.1(18)        | -5.2(14)        | -2.2(14)        | 1.6(14)         |
| C17' | 43.5(17)        | 47.2(19)        | 30.4(18)        | 1.3(15)         | 5.1(16)         | 1.9(18)         |
| C18  | 24.9(16)        | 58(2)           | 49(2)           | 10.0(18)        | -4.6(16)        | 3.1(17)         |
| C13' | 62(2)           | 39(2)           | 48(2)           | -13.3(17)       | 12.0(19)        | 1.8(18)         |
| C18' | 34.5(18)        | 61(2)           | 46(2)           | -8.5(19)        | -0.1(16)        | 2.9(17)         |
| C20' | 52(2)           | 65(3)           | 49(2)           | -18(2)          | -9.4(18)        | -2.8(19)        |
| C12  | 145(4)          | 31(2)           | 35(2)           | 2.4(17)         | 12(3)           | -15(2)          |
| C14' | 96(4)           | 80(3)           | 79(3)           | -39(3)          | 21(3)           | -34(3)          |

| Atom | U <sub>11</sub> | U <sub>22</sub> | U <sub>33</sub> | U <sub>23</sub> | U <sub>13</sub> | U <sub>12</sub> |
|------|-----------------|-----------------|-----------------|-----------------|-----------------|-----------------|
| C16' | 119(5)          | 120(5)          | 108(5)          | -58(4)          | -16(4)          | 70(4)           |
| C15' | 64(3)           | 259(10)         | 147(6)          | -138(7)         | -17(4)          | 12(5)           |
| C17  | 83(3)           | 31.6(18)        | 34(2)           | 4.6(15)         | 5(2)            | -12.4(18)       |
| C13A | 102(13)         | 33(6)           | 25(6)           | -6(5)           | -3(10)          | 1(9)            |
| C16A | 105(10)         | 76(8)           | 56(8)           | -10(6)          | -21(8)          | -4(8)           |
| C14A | 109(11)         | 50(8)           | 40(7)           | 6(5)            | 0(8)            | 4(7)            |
| C15A | 104(9)          | 80(8)           | 60(7)           | 2(6)            | 5(6)            | 6(7)            |
| C15B | 174(11)         | 73(7)           | 50(6)           | 19(5)           | 50(7)           | -1(7)           |
| C13B | 107(11)         | 39(6)           | 29(7)           | -1(4)           | 2(9)            | -6(9)           |
| C16B | 150(20)         | 93(12)          | 54(9)           | 13(9)           | 21(14)          | 44(12)          |
| C14B | 94(12)          | 49(8)           | 38(7)           | 10(5)           | 19(8)           | 0(7)            |

Table S6: Bond Lengths in Å for compound **1**.

| Atom Atom | Length/Å | Atom Atom | Length/Å  |
|-----------|----------|-----------|-----------|
| Cl1 C5    | 1.736(3) | C6 C5     | 1.452(4)  |
| Cl1' C5'  | 1.740(3) | C6 C7     | 1.542(4)  |
| O1' C1'   | 1.353(4) | C11' C10' | 1.451(4)  |
| O1' C3'   | 1.377(3) | C11' C12' | 1.347(4)  |
| O4 C19    | 1.352(4) | C11' C17' | 1.501(4)  |
| O4 C7     | 1.430(4) | C10' C9'  | 1.350(4)  |
| O1 C3     | 1.389(3) | C19' C20' | 1.495(5)  |
| O1 C1     | 1.348(4) | C4' C3'   | 1.356(4)  |
| O5 C19    | 1.204(3) | C3' C9'   | 1.435(4)  |
| O4' C19'  | 1.356(4) | C8 C7     | 1.514(4)  |
| O4' C7'   | 1.434(4) | C5' C6'   | 1.445(5)  |
| O2 C6     | 1.212(4) | C8' C7'   | 1.539(4)  |
| O5' C19'  | 1.201(4) | C6' C7'   | 1.536(5)  |
| O3' C8'   | 1.207(4) | C10 C11   | 1.441(4)  |
| O3 C8     | 1.216(4) | C7 C18    | 1.531(4)  |
| O2' C6'   | 1.227(4) | C11 C12   | 1.331(5)  |
| C4A' C8A' | 1.452(4) | C11 C17   | 1.504(4)  |
| C4A' C4'  | 1.431(4) | C12' C13' | 1.501(5)  |
| C4A' C5'  | 1.370(4) | C7' C18'  | 1.528(4)  |
| C4A C8A   | 1.455(4) | C13' C14' | 1.515(6)  |
| C4A C4    | 1.434(4) | C13' C16' | 1.535(6)  |
| C4A C5    | 1.362(4) | C12 C13A  | 1.558(18) |
| C8A' C1'  | 1.343(4) | C12 C13B  | 1.510(17) |
| C8A' C8'  | 1.472(4) | C14' C15' | 1.490(9)  |
| C8A C1    | 1.340(4) | C13A C16A | 1.58(2)   |
| C8A C8    | 1.471(4) | C13A C14A | 1.47(2)   |
| C3 C9     | 1.439(4) | C14A C15A | 1.511(19) |
| C3 C4     | 1.343(4) | C15B C14B | 1.525(16) |
| C9 C10    | 1.336(4) | C13B C16B | 1.56(2)   |
| C19 C20   | 1.484(4) | C13B C14B | 1.48(2)   |

Table S7: Bond Angles in for compound 1.

| Atom Atom Atom | Angle/°  | Atom Atom Atom | Angle/°   |
|----------------|----------|----------------|-----------|
| C1' O1' C3'    | 118.2(2) | O3 C8 C7       | 121.1(3)  |
| C19 O4 C7      | 114.8(2) | C8A C8 C7      | 116.0(3)  |
| C1 O1 C3       | 117.6(2) | C4A' C5' C11'  | 120.4(3)  |
| C19' O4' C7'   | 114.1(2) | C4A' C5' C6'   | 123.4(3)  |
| C4' C4A' C8A'  | 114.6(2) | C6' C5' C11'   | 116.1(2)  |
| C5' C4A' C8A'  | 120.9(3) | O3' C8' C8A'   | 123.8(3)  |
| C5' C4A' C4'   | 124.4(3) | O3' C8' C7'    | 120.2(3)  |
| C4 C4A C8A     | 113.7(3) | C8A' C8' C7'   | 115.9(3)  |
| C5 C4A C8A     | 120.5(3) | C10' C9' C3'   | 125.8(3)  |
| C5 C4A C4      | 125.7(3) | O2' C6' C5'    | 123.9(3)  |
| C4A' C8A' C8'  | 121.4(3) | O2' C6' C7'    | 119.1(3)  |
| C1' C8A' C4A'  | 120.0(3) | C5' C6' C7'    | 116.9(3)  |
| C1' C8A' C8'   | 118.6(3) | C9 C10 C11     | 125.5(3)  |
| C4A C8A C8     | 121.1(3) | O4 C7 C6       | 111.1(2)  |
| C1 C8A C4A     | 119.9(3) | O4 C7 C8       | 109.9(2)  |
| C1 C8A C8      | 119.0(3) | O4 C7 C18      | 105.3(2)  |
| O1 C3 C9       | 112.6(3) | C8 C7 C6       | 115.1(2)  |
| C4 C3 O1       | 120.9(3) | C8 C7 C18      | 107.5(3)  |
| C4 C3 C9       | 126.5(3) | C18 C7 C6      | 107.4(3)  |
| C10 C9 C3      | 124.6(3) | C10 C11 C17    | 117.2(3)  |
| C3 C4 C4A      | 123.1(3) | C12 C11 C10    | 119.4(3)  |
| O4 C19 C20     | 111.5(3) | C12 C11 C17    | 123.5(3)  |
| O5 C19 O4      | 121.9(3) | C11' C12' C13' | 128.5(3)  |
| O5 C19 C20     | 126.6(3) | O4' C7' C8'    | 109.5(2)  |
| O2 C6 C5       | 124.0(3) | O4' C7' C6'    | 110.1(2)  |
| O2 C6 C7       | 119.8(3) | O4' C7' C18'   | 105.5(3)  |
| C5 C6 C7       | 116.0(3) | C6' C7' C8'    | 115.6(3)  |
| C4A C5 C11     | 120.4(2) | C18' C7' C8'   | 107.6(3)  |
| C4A C5 C6      | 123.5(3) | C18' C7' C6'   | 108.2(3)  |
| C6 C5 C11      | 116.0(2) | C12' C13' C14' | 112.2(3)  |
| C8A' C1' O1'   | 123.9(3) | C12' C13' C16' | 108.2(3)  |
| C10' C11' C17' | 117.6(3) | C14' C13' C16' | 111.4(4)  |
| C12' C11' C10' | 118.4(3) | C11 C12 C13A   | 128.8(6)  |
| C12' C11' C17' | 124.0(3) | C11 C12 C13B   | 125.2(7)  |
| C9' C10' C11'  | 125.2(3) | C15' C14' C13' | 113.5(5)  |
| O4' C19' C20'  | 111.4(3) | C12 C13A C16A  | 114.6(10) |
| O5' C19' O4'   | 122.5(3) | C14A C13A C12  | 107.4(12) |
| O5' C19' C20'  | 126.1(3) | C14A C13A C16A | 109.9(13) |
| C8A C1 O1      | 124.8(3) | C13A C14A C15A | 113.3(13) |
| C3' C4' C4A'   | 121.7(3) | C12 C13B C16B  | 99.3(11)  |
| O1' C3' C9'    | 113.8(2) | C14B C13B C12  | 117.0(12) |
| C4' C3' O1'    | 121.5(3) | C14B C13B C16B | 111.6(14) |
| C4' C3' C9'    | 124.7(3) | C13B C14B C15B | 112.7(12) |
| O3 C8 C8A      | 122.8(3) |                |           |

Table S8: Torsion Angles in ° for compound 1.

| A    | B    | C   | D    | Angle/°   | A    | B    | C    | D    | Angle/°    |
|------|------|-----|------|-----------|------|------|------|------|------------|
| Cl1' | C5'  | C6' | O2'  | -6.7(4)   | C5   | C4A  | C4   | C3   | 178.3(3)   |
| Cl1' | C5'  | C6' | C7'  | 169.1(2)  | C5   | C6   | C7   | O4   | 156.4(2)   |
| O1'  | C3'  | C9' | C10' | -4.2(4)   | C5   | C6   | C7   | C8   | 30.7(4)    |
| O1   | C3   | C9  | C10  | -2.9(4)   | C5   | C6   | C7   | C18  | -88.9(3)   |
| O1   | C3   | C4  | C4A  | 0.5(4)    | C1'  | O1'  | C3'  | C4'  | 0.1(4)     |
| O2   | C6   | C5  | Cl1  | -8.0(4)   | C1'  | O1'  | C3'  | C9'  | 179.3(2)   |
| O2   | C6   | C5  | C4A  | 169.1(3)  | C1'  | C8A' | C8'  | O3'  | 8.5(5)     |
| O2   | C6   | C7  | O4   | -28.7(4)  | C1'  | C8A' | C8'  | C7'  | -168.4(3)  |
| O2   | C6   | C7  | C8   | -154.4(3) | C11' | C10' | C9'  | C3'  | -178.3(3)  |
| O2   | C6   | C7  | C18  | 85.9(3)   | C11' | C12' | C13' | C14' | -110.5(5)  |
| O3'  | C8'  | C7' | O4'  | 31.6(4)   | C11' | C12' | C13' | C16' | 126.2(5)   |
| O3'  | C8'  | C7' | C6'  | 156.5(3)  | C10' | C11' | C12' | C13' | -176.1(3)  |
| O3'  | C8'  | C7' | C18' | -82.6(4)  | C19' | O4'  | C7'  | C8'  | 64.3(3)    |
| O3   | C8   | C7  | O4   | 26.3(4)   | C19' | O4'  | C7'  | C6'  | -63.7(3)   |
| O3   | C8   | C7  | C6   | 152.6(3)  | C19' | O4'  | C7'  | C18' | 179.8(3)   |
| O3   | C8   | C7  | C18  | -87.8(3)  | C1   | O1   | C3   | C9   | 177.8(2)   |
| O2'  | C6'  | C7' | O4'  | -32.2(4)  | C1   | O1   | C3   | C4   | -1.6(4)    |
| O2'  | C6'  | C7' | C8'  | -156.8(3) | C1   | C8A  | C8   | O3   | 10.8(4)    |
| O2'  | C6'  | C7' | C18' | 82.6(4)   | C1   | C8A  | C8   | C7   | -165.8(3)  |
| C4A' | C8A' | C1' | O1'  | 0.3(4)    | C4'  | C4A' | C8A' | C1'  | 0.5(4)     |
| C4A' | C8A' | C8' | O3'  | -169.3(3) | C4'  | C4A' | C8A' | C8'  | 178.3(2)   |
| C4A' | C8A' | C8' | C7'  | 13.8(4)   | C4'  | C4A' | C5'  | Cl1' | -1.7(4)    |
| C4A' | C4'  | C3' | O1'  | 0.7(4)    | C4'  | C4A' | C5'  | C6'  | -177.7(3)  |
| C4A' | C4'  | C3' | C9'  | -178.4(2) | C4'  | C3'  | C9'  | C10' | 174.9(3)   |
| C4A' | C5'  | C6' | O2'  | 169.5(3)  | C3'  | O1'  | C1'  | C8A' | -0.6(4)    |
| C4A' | C5'  | C6' | C7'  | -14.7(4)  | C8   | C8A  | C1   | O1   | -177.8(3)  |
| C4A  | C8A  | C1  | O1   | -0.1(5)   | C5'  | C4A' | C8A' | C1'  | -178.2(3)  |
| C4A  | C8A  | C8  | O3   | -166.9(3) | C5'  | C4A' | C8A' | C8'  | -0.4(4)    |
| C4A  | C8A  | C8  | C7   | 16.5(4)   | C5'  | C4A' | C4'  | C3'  | 177.7(3)   |
| C8A' | C4A' | C4' | C3'  | -1.0(4)   | C5'  | C6'  | C7'  | O4'  | 151.8(2)   |
| C8A' | C4A' | C5' | Cl1' | 176.9(2)  | C5'  | C6'  | C7'  | C8'  | 27.1(4)    |
| C8A' | C4A' | C5' | C6'  | 0.8(4)    | C5'  | C6'  | C7'  | C18' | -93.4(3)   |
| C8A' | C8'  | C7' | O4'  | -151.4(2) | C8'  | C8A' | C1'  | O1'  | -177.5(3)  |
| C8A' | C8'  | C7' | C6'  | -26.5(4)  | C10  | C11  | C12  | C13A | -160.8(9)  |
| C8A' | C8'  | C7' | C18' | 94.4(3)   | C10  | C11  | C12  | C13B | 163.7(8)   |
| C8A  | C4A  | C4  | C3   | 0.8(4)    | C7   | O4   | C19  | O5   | 5.4(4)     |
| C8A  | C4A  | C5  | Cl1  | 177.9(2)  | C7   | O4   | C19  | C20  | -174.6(2)  |
| C8A  | C4A  | C5  | C6   | 0.9(4)    | C7   | C6   | C5   | Cl1  | 166.7(2)   |
| C8A  | C8   | C7  | O4   | -157.0(2) | C7   | C6   | C5   | C4A  | -16.2(4)   |
| C8A  | C8   | C7  | C6   | -30.7(4)  | C11  | C12  | C13A | C16A | 104.7(12)  |
| C8A  | C8   | C7  | C18  | 88.9(3)   | C11  | C12  | C13A | C14A | -132.9(10) |
| C3   | O1   | C1  | C8A  | 1.4(4)    | C11  | C12  | C13B | C16B | 112.2(11)  |
| C3   | C9   | C10 | C11  | -179.4(3) | C11  | C12  | C13B | C14B | -127.7(13) |
| C9   | C3   | C4  | C4A  | -178.8(3) | C12' | C11' | C10' | C9'  | 175.4(3)   |
| C9   | C10  | C11 | C12  | 171.7(4)  | C12' | C13' | C14' | C15' | 68.3(5)    |

| A   | B   | C   | D   | Angle/°                  | A    | B    | C    | D    | Angle/°                   |
|-----|-----|-----|-----|--------------------------|------|------|------|------|---------------------------|
| C9  | C10 | C11 | C17 | -9.0(5)                  | C7'  | O4'  | C19' | O5'  | 0.2(4)                    |
| C4  | C4A | C8A | C1  | -1.1(4)                  | C7'  | O4'  | C19' | C20' | -177.1(3)                 |
| C4  | C4A | C8A | C8  | 176.6(2)                 | C17' | C11' | C10' | C9'  | -2.9(4)                   |
| C4  | C4A | C5  | C11 | 0.7(4)                   | C17' | C11' | C12' | C13' | 2.1(6)                    |
| C4  | C4A | C5  | C6  | <sup>-</sup><br>176.3(3) | C12  | C13A | C14A | C15A | 60.2(15)                  |
| C4  | C3  | C9  | C10 | 176.4(3)                 | C12  | C13B | C14B | C15B | 178.8(12)                 |
| C19 | O4  | C7  | C6  | -68.3(3)                 | C16' | C13' | C14' | C15' | -170.2(5)                 |
| C19 | O4  | C7  | C8  | 60.3(3)                  | C17  | C11  | C12  | C13A | 20.0(11)                  |
| C19 | O4  | C7  | C18 | 175.8(2)                 | C17  | C11  | C12  | C13B | -15.5(10)                 |
| C5  | C4A | C8A | C1  | <sup>-</sup><br>178.6(3) | C16A | C13A | C14A | C15A | <sup>-</sup><br>174.5(12) |
| C5  | C4A | C8A | C8  | -0.9(4)                  | C16B | C13B | C14B | C15B | -67.9(18)                 |

Table S9: Hydrogen Bonds for compound **1**.

| D   | H   | A                | d(D-H)/Å | d(H-A)/Å | d(D-A)/Å | D-H-A/° |
|-----|-----|------------------|----------|----------|----------|---------|
| C1' | H1' | O2' <sup>1</sup> | 0.95     | 2.46     | 3.104(4) | 124.8   |

<sup>1</sup>2-X,-1/2+Y,3/2-Z

Table S10: Hydrogen Fractional Atomic Coordinates ( $\times 10^4$ ) and Equivalent Isotropic Displacement Parameters ( $\text{\AA}^2 \times 10^3$ ) for compound **1**.  $U_{eq}$  is defined as 1/3 of the trace of the orthogonalised  $U_{ij}$ .

| Atom | x        | y        | z        | $U_{eq}$ |
|------|----------|----------|----------|----------|
| H9   | 4903.61  | 775.76   | 7294.51  | 37       |
| H4   | 5440.06  | 977.86   | 6578.65  | 35       |
| H1'  | 10020.05 | 1339.53  | 7488.74  | 36       |
| H20A | 10787.05 | 4054.11  | 5073.52  | 53       |
| H20B | 10873.98 | 4663.17  | 5431.54  | 53       |
| H20C | 9151.88  | 4694.73  | 5138.43  | 53       |
| H10' | 10660    | 365.63   | 6409.65  | 34       |
| H1   | 5755.84  | 3701.8   | 6817.15  | 39       |
| H4'  | 10746.31 | 3050.09  | 6445.36  | 34       |
| H9'  | 10759.46 | 1837.79  | 6022.04  | 35       |
| H10  | 5030.41  | 2206.03  | 7712.28  | 41       |
| H12' | 11035.14 | -764.3   | 6050.39  | 46       |
| H17D | 9907.72  | 1166.39  | 5452.5   | 61       |
| H17E | 11102.63 | 495.31   | 5231.82  | 61       |
| H17F | 12132.81 | 1182.58  | 5475.6   | 61       |
| H18A | 3225.41  | 3129.38  | 5742.07  | 66       |
| H18B | 3858.72  | 3236.37  | 5301.62  | 66       |
| H18C | 3808.41  | 3999.39  | 5584.02  | 66       |
| H13' | 11776.45 | -687.54  | 5237.98  | 60       |
| H18D | 7120.37  | 3640.07  | 7636.55  | 71       |
| H18E | 7540.35  | 4377.22  | 7921.49  | 71       |
| H18F | 7314.6   | 3486.04  | 8091.33  | 71       |
| H20D | 12725.5  | 4521.08  | 8676.38  | 83       |
| H20E | 14670.15 | 4112.46  | 8564.43  | 83       |
| H20F | 13072.84 | 3587.37  | 8765.67  | 83       |
| H14E | 10169.93 | -1952.53 | 5172.53  | 102      |
| H14F | 9406.4   | -1840.72 | 5603.27  | 102      |
| H16G | 14292.41 | -1213.04 | 5585.31  | 174      |
| H16H | 13408.73 | -1931.84 | 5337.72  | 174      |
| H16I | 12984.59 | -1865.59 | 5790.66  | 174      |
| H15G | 7868.86  | -653.18  | 5403.86  | 235      |
| H15H | 7132.43  | -1432.15 | 5178.42  | 235      |
| H15I | 8543.55  | -824.52  | 4970.8   | 235      |
| H17A | 3050.28  | 239.44   | 7832.6   | 75       |
| H17B | 4041.46  | 44.58    | 8236.13  | 75       |
| H17C | 5221.33  | 23.84    | 7843.91  | 75       |
| H13A | 4898.3   | 550.8    | 8756.88  | 64       |
| H16A | 8098.1   | 986.03   | 8761.84  | 118      |
| H16B | 7307.04  | 1002.08  | 9194.15  | 118      |
| H16C | 7510.01  | 1823.31  | 8955.72  | 118      |
| H12  | 5150(50) | 2120(30) | 8383(11) | 63(11)   |
| H14A | 4042.43  | 2086.57  | 9062.35  | 79       |
| H14B | 4037.58  | 1272     | 9308.94  | 79       |
| H15A | 1570.16  | 772.73   | 8930.67  | 122      |
| H15B | 1583.88  | 1581.41  | 8679.03  | 122      |
| H15C | 992.21   | 1611.19  | 9124.7   | 122      |
| H15D | 1489.38  | 833.22   | 9294.54  | 149      |
| H15E | 1525.23  | 1681.93  | 9513.63  | 149      |
| H15F | 3343.99  | 1125.18  | 9509.22  | 149      |
| H13B | 3487.51  | 662.19   | 8702.89  | 70       |
| H16D | 6696.34  | 1542.49  | 8984.37  | 148      |
| H16E | 6780.17  | 665.61   | 8793.16  | 148      |

| Atom | x       | y       | z       | U <sub>(eq)</sub> |
|------|---------|---------|---------|-------------------|
| H16F | 5820.57 | 786.73  | 9206.52 | 148               |
| H14C | 1807    | 1868.58 | 8834.84 | 73                |
| H14D | 3595.71 | 2208.96 | 9056.88 | 73                |

Table S11: Fractional Atomic Coordinates ( $\times 10^4$ ) and Equivalent Isotropic Displacement Parameters ( $\text{\AA}^2 \times 10^3$ ) for compound **5**.  $U_{eq}$  is defined as 1/3 of the trace of the orthogonalised  $U_{ij}$ .

| Atom | x          | y          | z          | U <sub>(eq)</sub> |
|------|------------|------------|------------|-------------------|
| Cl1  | -1240.2(9) | 3123.3(7)  | 6019.6(2)  | 31.13(15)         |
| O4   | -143(2)    | -58.5(18)  | 7093.4(4)  | 23.6(3)           |
| O2   | -2162(3)   | 634(2)     | 6520.5(5)  | 31.5(4)           |
| O3   | 3498(3)    | 1320(2)    | 7198.9(5)  | 32.6(4)           |
| O5   | -992(3)    | 2435.3(19) | 7197.5(5)  | 29.4(4)           |
| O1'  | 6140(3)    | 8011(2)    | 6876.8(5)  | 36.5(4)           |
| N1   | 5664(3)    | 4860(2)    | 6585.4(5)  | 25.5(4)           |
| C6   | -491(3)    | 1251(3)    | 6551.1(6)  | 23.2(5)           |
| C5   | 269(4)     | 2488(3)    | 6351.9(6)  | 23.8(5)           |
| C8   | 2667(3)    | 1575(3)    | 6933.2(6)  | 23.8(5)           |
| C4A  | 2057(3)    | 3279(3)    | 6422.3(6)  | 22.9(4)           |
| C3   | 4524(4)    | 5365(3)    | 6314.0(6)  | 28.4(5)           |
| C1   | 5015(3)    | 3638(3)    | 6772.0(6)  | 23.4(5)           |
| C8A  | 3279(3)    | 2848(3)    | 6704.1(6)  | 22.4(5)           |
| C19  | -1099(4)   | 1067(3)    | 7273.0(6)  | 22.9(5)           |
| C4   | 2773(4)    | 4596(3)    | 6237.9(6)  | 27.9(5)           |
| C1'  | 7612(4)    | 5567(3)    | 6685.7(7)  | 29.4(5)           |
| C20  | -2249(4)   | 384(3)     | 7559.2(7)  | 31.3(5)           |
| C2'  | 7384(4)    | 6741(3)    | 6967.5(6)  | 28.7(5)           |
| C7   | 963(3)     | 525(3)     | 6808.5(6)  | 23.7(5)           |
| C10  | 4565(4)    | 7115(3)    | 5820.2(8)  | 37.3(6)           |
| C9   | 5211(5)    | 6719(4)    | 6120.0(7)  | 41.5(7)           |
| C18  | 1909(4)    | -911(3)    | 6639.9(7)  | 32.8(6)           |
| C11  | 5079(5)    | 8465(3)    | 5617.6(7)  | 43.9(8)           |
| C13  | 4384(6)    | 10001(4)   | 5074.4(9)  | 52.0(8)           |
| C12  | 4199(5)    | 8693(4)    | 5323.0(10) | 56.6(9)           |
| C15A | 717(17)    | 10843(13)  | 5226(3)    | 100(4)            |
| C14A | 2073(11)   | 10371(8)   | 4936(2)    | 56.0(17)          |
| C17A | 5817(14)   | 9883(8)    | 5786.4(16) | 59(2)             |
| C17B | 7337(11)   | 9071(8)    | 5707.9(16) | 45.7(15)          |
| C14B | 3234(11)   | 11476(9)   | 5150.9(19) | 56.2(18)          |
| C15B | 3620(16)   | 12396(11)  | 5471(2)    | 77(2)             |
| C16B | 4207(17)   | 9286(10)   | 4758(2)    | 61(2)             |
| C16A | 5535(17)   | 9604(12)   | 4749(2)    | 65(2)             |



Table S12: Anisotropic Displacement Parameters ( $\times 10^4$ ) for compound **5**. The anisotropic displacement factor exponent takes the form:  $-2\pi^2[h^2a^{*2} \times U_{11} + 2hka^* \times b^* \times U_{12} + \dots]$ .

| Atom | U <sub>11</sub> | U <sub>22</sub> | U <sub>33</sub> | U <sub>23</sub> | U <sub>13</sub> | U <sub>12</sub> |
|------|-----------------|-----------------|-----------------|-----------------|-----------------|-----------------|
| Cl1  | 36.1(3)         | 36.2(3)         | 21.1(3)         | 4.5(2)          | -6.3(2)         | -2.1(3)         |
| O4   | 26.2(8)         | 21.0(7)         | 23.6(8)         | 3.0(6)          | -0.5(6)         | -0.7(7)         |
| O2   | 28.3(9)         | 37.1(9)         | 29.1(10)        | 5.2(7)          | -4.5(7)         | -5.6(8)         |
| O3   | 31.6(9)         | 35.9(9)         | 30.3(9)         | 8.1(7)          | -7.9(8)         | -4.0(7)         |
| O5   | 33.0(9)         | 24.5(8)         | 30.7(9)         | 0.4(7)          | 0.7(8)          | 1.5(7)          |
| O1'  | 28.8(9)         | 30.3(9)         | 50.5(12)        | -2.4(8)         | -3.2(8)         | 1.4(8)          |
| N1   | 26.7(10)        | 26.4(10)        | 23.3(10)        | -3.3(8)         | 3.2(8)          | -3.5(8)         |
| C6   | 24.3(11)        | 25.1(11)        | 20.3(11)        | -1.9(9)         | -0.6(9)         | 1.0(9)          |
| C5   | 27.8(12)        | 26.9(11)        | 16.6(11)        | -0.7(9)         | -2.2(9)         | 3.9(9)          |
| C8   | 21.3(11)        | 22.8(11)        | 27.2(12)        | 0.2(9)          | -0.1(9)         | 2.8(9)          |
| C4A  | 26.9(11)        | 23.7(10)        | 18.1(10)        | -2.3(9)         | 3.2(8)          | 2.0(9)          |
| C3   | 37.1(13)        | 29.3(12)        | 18.7(12)        | -2.9(9)         | 5.1(9)          | -4.8(10)        |
| C1   | 24.0(11)        | 24.2(11)        | 22.2(11)        | -0.7(9)         | 2.0(9)          | 3.1(9)          |
| C8A  | 23.7(11)        | 22.4(11)        | 21.1(11)        | -2.1(8)         | 2.0(8)          | 3.0(8)          |
| C19  | 20.5(10)        | 25.8(11)        | 22.3(11)        | 0.9(9)          | -4.9(9)         | 0.0(9)          |
| C4   | 34.6(12)        | 31.4(12)        | 17.7(11)        | 2.5(9)          | -0.6(10)        | -3.1(10)        |
| C1'  | 23.9(11)        | 29.6(12)        | 34.7(14)        | -1.5(10)        | 4.9(10)         | -4.6(10)        |
| C20  | 30.4(12)        | 36.6(13)        | 26.9(13)        | 2.7(10)         | 1.6(10)         | -1.5(11)        |
| C2'  | 26.0(12)        | 28.5(12)        | 31.5(13)        | -0.7(11)        | -3.1(10)        | -4.3(10)        |
| C7   | 25.5(11)        | 23.0(10)        | 22.5(11)        | 2.1(9)          | 1.6(9)          | 0.4(9)          |
| C10  | 39.0(14)        | 33.1(13)        | 39.7(16)        | 9.5(12)         | -2.2(12)        | -9.2(12)        |
| C9   | 58.6(17)        | 44.9(15)        | 21.0(12)        | 0.5(11)         | -0.1(12)        | -26.7(15)       |
| C18  | 33.2(13)        | 28.2(12)        | 37.0(15)        | -4.3(10)        | 2.1(11)         | 4.2(10)         |
| C11  | 76(2)           | 33.5(14)        | 22.5(13)        | -0.5(11)        | 8.3(13)         | -19.4(14)       |
| C13  | 69(2)           | 42.3(16)        | 45.1(19)        | 16.8(14)        | 8.3(16)         | -2.2(16)        |
| C12  | 52.4(19)        | 51.9(18)        | 65(2)           | 32.2(16)        | -12.1(16)       | -15.3(15)       |
| C15A | 89(7)           | 77(6)           | 135(10)         | 31(6)           | 43(7)           | 35(5)           |
| C14A | 62(4)           | 44(3)           | 62(4)           | 11(3)           | -11(3)          | 2(3)            |
| C17A | 102(6)          | 42(3)           | 32(3)           | 8(3)            | -12(3)          | -38(4)          |
| C17B | 53(4)           | 47(3)           | 37(3)           | 14(3)           | -4(3)           | -19(3)          |
| C14B | 55(4)           | 63(4)           | 51(4)           | 22(3)           | -3(3)           | -1(3)           |
| C15B | 90(6)           | 77(5)           | 65(5)           | 2(4)            | 10(5)           | 18(5)           |
| C16B | 88(6)           | 53(4)           | 43(4)           | 18(3)           | -18(4)          | -10(4)          |
| C16A | 87(6)           | 64(5)           | 43(4)           | 18(4)           | 12(4)           | 10(5)           |

Table S13: Bond Lengths in Å for compound **5**.

| Atom | Atom | Length/Å | Atom | Atom | Length/Å  |
|------|------|----------|------|------|-----------|
| Cl1  | C5   | 1.745(2) | C3   | C9   | 1.462(4)  |
| O4   | C19  | 1.355(3) | C1   | C8A  | 1.366(3)  |
| O4   | C7   | 1.440(3) | C19  | C20  | 1.490(3)  |
| O2   | C6   | 1.237(3) | C1'  | C2'  | 1.509(4)  |
| O3   | C8   | 1.212(3) | C7   | C18  | 1.532(3)  |
| O5   | C19  | 1.207(3) | C10  | C9   | 1.310(4)  |
| O1'  | C2'  | 1.412(3) | C10  | C11  | 1.447(4)  |
| N1   | C3   | 1.387(3) | C11  | C12  | 1.323(5)  |
| N1   | C1   | 1.350(3) | C11  | C17A | 1.468(7)  |
| N1   | C1'  | 1.486(3) | C11  | C17B | 1.631(7)  |
| C6   | C5   | 1.413(3) | C13  | C12  | 1.495(4)  |
| C6   | C7   | 1.539(3) | C13  | C14A | 1.665(8)  |
| C5   | C4A  | 1.398(3) | C13  | C14B | 1.505(8)  |
| C8   | C8A  | 1.474(3) | C13  | C16B | 1.403(9)  |
| C8   | C7   | 1.529(3) | C13  | C16A | 1.541(9)  |
| C4A  | C8A  | 1.432(3) | C15A | C14A | 1.518(13) |
| C4A  | C4   | 1.423(3) | C14B | C15B | 1.516(13) |
| C3   | C4   | 1.372(4) |      |      |           |

Table S14: Bond Angles in ° for compound **5**.

| Atom | Atom | Atom | Angle/°    | Atom | Atom | Atom | Angle/°    |
|------|------|------|------------|------|------|------|------------|
| C19  | O4   | C7   | 114.17(17) | C3   | C4   | C4A  | 123.3(2)   |
| C3   | N1   | C1'  | 124.1(2)   | N1   | C1'  | C2'  | 112.3(2)   |
| C1   | N1   | C3   | 119.4(2)   | O1'  | C2'  | C1'  | 112.3(2)   |
| C1   | N1   | C1'  | 116.5(2)   | O4   | C7   | C6   | 109.82(18) |
| O2   | C6   | C5   | 125.8(2)   | O4   | C7   | C8   | 109.15(19) |
| O2   | C6   | C7   | 117.4(2)   | O4   | C7   | C18  | 106.12(19) |
| C5   | C6   | C7   | 116.5(2)   | C8   | C7   | C6   | 116.59(19) |
| C6   | C5   | Cl1  | 116.66(18) | C8   | C7   | C18  | 107.74(19) |
| C4A  | C5   | Cl1  | 119.51(18) | C18  | C7   | C6   | 106.89(19) |
| C4A  | C5   | C6   | 123.7(2)   | C9   | C10  | C11  | 129.3(3)   |
| O3   | C8   | C8A  | 122.9(2)   | C10  | C9   | C3   | 125.4(3)   |
| O3   | C8   | C7   | 121.1(2)   | C10  | C11  | C17A | 118.8(3)   |
| C8A  | C8   | C7   | 115.9(2)   | C10  | C11  | C17B | 110.4(3)   |
| C5   | C4A  | C8A  | 121.1(2)   | C12  | C11  | C10  | 120.3(3)   |
| C5   | C4A  | C4   | 124.3(2)   | C12  | C11  | C17A | 115.6(4)   |
| C4   | C4A  | C8A  | 114.5(2)   | C12  | C11  | C17B | 123.8(3)   |
| N1   | C3   | C9   | 118.9(2)   | C12  | C13  | C14A | 106.4(4)   |
| C4   | C3   | N1   | 119.2(2)   | C12  | C13  | C14B | 116.7(4)   |
| C4   | C3   | C9   | 121.9(2)   | C12  | C13  | C16A | 115.6(4)   |
| N1   | C1   | C8A  | 123.0(2)   | C16B | C13  | C12  | 105.1(4)   |
| C4A  | C8A  | C8   | 121.0(2)   | C16B | C13  | C14B | 120.1(5)   |
| C1   | C8A  | C8   | 118.4(2)   | C16A | C13  | C14A | 103.0(5)   |
| C1   | C8A  | C4A  | 120.6(2)   | C11  | C12  | C13  | 131.1(3)   |
| O4   | C19  | C20  | 111.5(2)   | C15A | C14A | C13  | 110.5(7)   |
| O5   | C19  | O4   | 121.8(2)   | C13  | C14B | C15B | 121.0(6)   |
| O5   | C19  | C20  | 126.7(2)   |      |      |      |            |

Table S15: Torsion Angles in ° for compound **5**

| A   | B   | C   | D   | Angle/°     | A    | B   | C    | D    | Angle/°     |
|-----|-----|-----|-----|-------------|------|-----|------|------|-------------|
| Cl1 | C5  | C4A | C8A | 176.51(17)  | C8A  | C4A | C4   | C3   | 2.2(3)      |
| Cl1 | C5  | C4A | C4  | -0.4(3)     | C19  | O4  | C7   | C6   | -64.4(2)    |
| O2  | C6  | C5  | Cl1 | -3.7(3)     | C19  | O4  | C7   | C8   | 64.5(2)     |
| O2  | C6  | C5  | C4A | 171.6(2)    | C19  | O4  | C7   | C18  | -179.63(19) |
| O2  | C6  | C7  | O4  | -34.6(3)    | C4   | C4A | C8A  | C8   | 175.9(2)    |
| O2  | C6  | C7  | C8  | -159.4(2)   | C4   | C4A | C8A  | C1   | -2.3(3)     |
| O2  | C6  | C7  | C18 | 80.1(3)     | C4   | C3  | C9   | C10  | -16.9(5)    |
| O3  | C8  | C8A | C4A | -169.3(2)   | C1'  | N1  | C3   | C4   | 178.1(2)    |
| O3  | C8  | C8A | C1  | 8.9(3)      | C1'  | N1  | C3   | C9   | -2.8(4)     |
| O3  | C8  | C7  | O4  | 32.5(3)     | C1'  | N1  | C1   | C8A  | -178.3(2)   |
| O3  | C8  | C7  | C6  | 157.6(2)    | C7   | O4  | C19  | O5   | -0.8(3)     |
| O3  | C8  | C7  | C18 | -82.3(3)    | C7   | O4  | C19  | C20  | 178.75(19)  |
| N1  | C3  | C4  | C4A | -0.6(4)     | C7   | C6  | C5   | Cl1  | 170.99(16)  |
| N1  | C3  | C9  | C10 | 164.0(3)    | C7   | C6  | C5   | C4A  | -13.7(3)    |
| N1  | C1  | C8A | C8  | -177.3(2)   | C7   | C8  | C8A  | C4A  | 13.6(3)     |
| N1  | C1  | C8A | C4A | 0.9(3)      | C7   | C8  | C8A  | C1   | -168.2(2)   |
| N1  | C1' | C2' | O1' | -61.1(3)    | C10  | C11 | C12  | C13  | 177.1(4)    |
| C6  | C5  | C4A | C8A | 1.3(3)      | C9   | C3  | C4   | C4A  | -179.7(2)   |
| C6  | C5  | C4A | C4  | -175.5(2)   | C9   | C10 | C11  | C12  | -177.4(4)   |
| C5  | C6  | C7  | O4  | 150.2(2)    | C9   | C10 | C11  | C17A | -24.4(7)    |
| C5  | C6  | C7  | C8  | 25.5(3)     | C9   | C10 | C11  | C17B | 27.8(5)     |
| C5  | C6  | C7  | C18 | -95.1(2)    | C11  | C10 | C9   | C3   | 176.6(3)    |
| C5  | C4A | C8A | C8  | -1.3(3)     | C12  | C13 | C14A | C15A | 59.8(7)     |
| C5  | C4A | C8A | C1  | -179.4(2)   | C12  | C13 | C14B | C15B | 59.8(8)     |
| C5  | C4A | C4  | C3  | 179.2(2)    | C14A | C13 | C12  | C11  | -138.7(5)   |
| C3  | N1  | C1  | C8A | 0.8(3)      | C17A | C11 | C12  | C13  | 23.4(7)     |
| C3  | N1  | C1' | C2' | 97.6(3)     | C17B | C11 | C12  | C13  | -31.6(7)    |
| C1  | N1  | C3  | C4  | -1.0(3)     | C14B | C13 | C12  | C11  | -79.3(6)    |
| C1  | N1  | C3  | C9  | 178.2(2)    | C16B | C13 | C12  | C11  | 144.8(6)    |
| C1  | N1  | C1' | C2' | -83.3(3)    | C16B | C13 | C14B | C15B | -171.2(8)   |
| C8A | C8  | C7  | O4  | -150.35(18) | C16A | C13 | C12  | C11  | 107.6(7)    |
| C8A | C8  | C7  | C6  | -25.2(3)    | C16A | C13 | C14A | C15A | -178.2(7)   |
| C8A | C8  | C7  | C18 | 94.8(2)     |      |     |      |      |             |

Table S16: Hydrogen Bonds for compound **5**.

| D   | H    | A               | d(D-H)/Å | d(H-A)/Å | d(D-A)/Å | D-H-A/° |
|-----|------|-----------------|----------|----------|----------|---------|
| C1  | H1   | O5 <sup>1</sup> | 0.95     | 2.45     | 3.315(3) | 150.6   |
| C20 | H20A | O3 <sup>2</sup> | 0.98     | 2.66     | 3.274(3) | 121.3   |
| C20 | H20C | O5 <sup>3</sup> | 0.98     | 2.52     | 3.454(3) | 159.8   |

<sup>1</sup>1+X,+Y,+Z; <sup>2</sup>-1+X,+Y,+Z; <sup>3</sup>-X,-1/2+Y,3/2-Z

Table S17 Hydrogen fractional atomic coordinates ( $\times 10^4$ ) and equivalent isotropic displacement parameters ( $\text{\AA}^2 \times 10^3$ ) for compound **5**. Ueq is defined as 1/3 of the trace of the orthogonalised Uij.

| Atom | x         | y         | z        | U <sub>(eq)</sub> |
|------|-----------|-----------|----------|-------------------|
| H1'  | 6832      | 8705      | 6782     | 55                |
| H1   | 5801      | 3313      | 6959     | 28                |
| H4   | 2000      | 4960      | 6053     | 33                |
| H1'A | 8218      | 6093      | 6488     | 35                |
| H1'B | 8537      | 4724      | 6759     | 35                |
| H20A | -3417     | -185      | 7472     | 47                |
| H20B | -2701     | 1227      | 7709     | 47                |
| H20C | -1387     | -339      | 7685     | 47                |
| H10  | 3625      | 6414      | 5722     | 45                |
| H9   | 6208      | 7365      | 6220     | 50                |
| H18A | 2736      | -1475     | 6804     | 49                |
| H18B | 2750      | -572      | 6451     | 49                |
| H18C | 848       | -1605     | 6557     | 49                |
| H12  | 3294      | 7887      | 5258     | 68                |
| H15A | 528       | 9946      | 5377     | 150               |
| H15B | -587      | 11179     | 5138     | 150               |
| H15C | 1335      | 11708     | 5351     | 150               |
| H14A | 2117      | 11226     | 4768     | 67                |
| H14B | 1523      | 9425      | 4825     | 67                |
| H17A | 4916      | 10153     | 5973     | 88                |
| H17B | 5858      | 10751     | 5625     | 88                |
| H17C | 7169      | 9692      | 5874     | 88                |
| H17D | 7345      | 9532      | 5934     | 69                |
| H17E | 7754      | 9863      | 5543     | 69                |
| H17F | 8269      | 8184      | 5701     | 69                |
| H14C | 1791      | 11199     | 5149     | 67                |
| H14D | 3454      | 12202     | 4960     | 67                |
| H15D | 2747      | 13320     | 5476     | 116               |
| H15E | 5027      | 12730     | 5477     | 116               |
| H15F | 3337      | 11732     | 5667     | 116               |
| H16A | 5143      | 8402      | 4743     | 92                |
| H16B | 4524      | 10051     | 4581     | 92                |
| H16C | 2832      | 8906      | 4727     | 92                |
| H16D | 6979      | 9595      | 4795     | 97                |
| H16E | 5239      | 10396     | 4577     | 97                |
| H16F | 5117      | 8570      | 4667     | 97                |
| H2'A | 8750(40)  | 7080(30)  | 7020(7)  | 22(6)             |
| H2'B | 6660(50)  | 6230(40)  | 7157(9)  | 43(9)             |
| H13  | 5630(100) | 10500(80) | 5123(16) | 120(20)           |

[illegible]

## References:

1. Son, S.; Ko, S.-K.; Kim, J. W.; Lee, J. K.; Jang, M.; Ryoo, I.-J.; Hwang, G. J.; Kwon, M. C.; Shin, K.-S.; Futamura, Y.; Hong, Y.-S.; Oh, H.; Kim, B. Y.; Ueki, M.; Takahashi, S.; Osada, H.; Jang, J.-H.; Ahn, J. S. Structures and Biological Activities of Azaphilones Produced by *Penicillium* Sp. KCB11A109 from a Ginseng Field. *Phytochemistry* **2016**, 122, 154–164. <https://doi.org/10.1016/j.phytochem.2015.12.008>.
2. Hemtasin, C.; Kanokmedhakul, S.; Moosophon, P.; Soyong, K.; Kanokmedhakul, K. Bioactive Azaphilones from the Fungus *Penicillium* Multicolor CM01. *Phytochem. Lett.* **2016**, 16, 56–60. <https://doi.org/10.1016/j.phytol.2016.03.004>.
3. Chong, R.; King, R. R.; Whalley, W. B. The Chemistry of Fungi. Part L X P The Synthesis of (+)-Sclerotiorin, of (+)-4,6-Dimethylocta-Trans-2,Trans-4-Dienoic Acid, and of an Analogue of Rotiorin. *J. Chem. Soc.* **1971**, 3566–3571. <https://doi.org/10.1039/J39710003566>.
4. Gu, B.-B. Azaphilone and Isocoumarin Derivatives from the Sponge-Derived Fungus *Eupenicillium* Sp. 6A-9. *Tetrahedron Lett.* **2018**, 59 (36), 3345–3348. <https://doi.org/10.1016/j.tetlet.2018.06.057>
